# Supplementary material for: The Impact of Sectoral Aggregation on Elasticities of Substitution Using Translog Cost Function
Source: Research Square preprint supplement (doi:10.21203/rs.3.rs-965035/v1), 2021-10-19
Supplement: Supplementary file 1 [file d663b59c0aea08046b8990ca.xlsx]

## Sheet: Info
	SI3 – Elasticities of substitution at different resolution levels
	Sheet Name	Description
	Elas_XX	Elasticities values from the modelled cost functions at XX aggregation level
	dElas_XX	Uncertainty ranges of the elasticities from the modelled cost functions at XX aggregation level
	Notes
	Opt	Optimum Aggregation Level (87 Sectors)
	Ind. Code	EXIOBASEv2 Industry List (163)
	i01.a	Cultivation of paddy rice
	i01.b	Cultivation of wheat
	i01.c	Cultivation of cereal grains nec
	i01.d	Cultivation of vegetables, fruit, nuts
	i01.e	Cultivation of oil seeds
	i01.f	Cultivation of sugar cane, sugar beet
	i01.g	Cultivation of plant-based fibers
	i01.h	Cultivation of crops nec
	i01.i	Cattle farming
	i01.j	Pigs farming
	i01.k	Poultry farming
	i01.l	Meat animals nec
	i01.m	Animal products nec
	i01.n	Raw milk
	i01.o	Wool, silk-worm cocoons
	i02	Forestry, logging and related service activities
	i05	Fishing, operating of fish hatcheries and fish farms; service activities incidental to fishing
	i10	Mining of coal and lignite; extraction of peat
	i11.a	Extraction of crude petroleum and services related to crude oil extraction, excluding surveying
	i11.b	Extraction of natural gas and services related to natural gas extraction, excluding surveying
	i11.c	Extraction, liquefaction, and regasification of other petroleum and gaseous materials
	i12	Mining of uranium and thorium ores
	i13.1	Mining of iron ores
	i13.20.11	Mining of copper ores and concentrates
	i13.20.12	Mining of nickel ores and concentrates
	i13.20.13	Mining of aluminium ores and concentrates
	i13.20.14	Mining of precious metal ores and concentrates
	i13.20.15	Mining of lead, zinc and tin ores and concentrates
	i13.20.16	Mining of other non-ferrous metal ores and concentrates
	i14.1	Quarrying of stone
	i14.2	Quarrying of sand and clay
	i14.3	Mining of chemical and fertilizer minerals, production of salt, other mining and quarrying n.e.c.
	i15.a	Processing of meat cattle
	i15.b	Processing of meat pigs
	i15.c	Processing of meat poultry
	i15.d	Production of meat products nec
	i15.e	Processing vegetable oils and fats
	i15.f	Processing of dairy products
	i15.g	Processed rice
	i15.h	Sugar refining
	i15.i	Processing of Food products nec
	i15.j	Manufacture of beverages
	i15.k	Manufacture of fish products
	i16	Manufacture of tobacco products
	i17	Manufacture of textiles
	i18	Manufacture of wearing apparel; dressing and dyeing of fur
	i19	Tanning and dressing of leather; manufacture of luggage, handbags, saddlery, harness and footwear
	i20	Manufacture of wood and of products of wood and cork, except furniture; manufacture of articles of straw and plaiting materials
	i20.w	Re-processing of secondary wood material into new wood material
	i21.1	Pulp
	i21.w.1	Re-processing of secondary paper into new pulp
	i21.2	Paper
	i22	Publishing, printing and reproduction of recorded media
	i23.1	Manufacture of coke oven products
	i23.2	Petroleum Refinery
	i23.3	Processing of nuclear fuel
	i24.1	Plastics, basic
	i24.1.w	Re-processing of secondary plastic into new plastic
	i24.2	N-fertiliser
	i24.3	P- and other fertiliser
	i24.4	Chemicals nec
	i25	Manufacture of rubber and plastic products
	i26.a	Manufacture of glass and glass products
	i26.w.1	Re-processing of secondary glass into new glass
	i26.b	Manufacture of ceramic goods
	i26.c	Manufacture of bricks, tiles and construction products, in baked clay
	i26.d	Manufacture of cement, lime and plaster
	i26.d.w	Re-processing of ash into clinker
	i26.e	Manufacture of other non-metallic mineral products n.e.c.
	i27.a	Manufacture of basic iron and steel and of ferro-alloys and first products thereof
	i27.a.w	Re-processing of secondary steel into new steel
	i27.41	Precious metals production
	i27.41.w	Re-processing of secondary preciuos metals into new preciuos metals
	i27.42	Aluminium production
	i27.42.w	Re-processing of secondary aluminium into new aluminium
	i27.43	Lead, zinc and tin production
	i27.43.w	Re-processing of secondary lead into new lead
	i27.44	Copper production
	i27.44.w	Re-processing of secondary copper into new copper
	i27.45	Other non-ferrous metal production
	i27.45.w	Re-processing of secondary other non-ferrous metals into new other non-ferrous metals
	i27.5	Casting of metals
	i28	Manufacture of fabricated metal products, except machinery and equipment
	i29	Manufacture of machinery and equipment n.e.c.
	i30	Manufacture of office machinery and computers
	i31	Manufacture of electrical machinery and apparatus n.e.c.
	i32	Manufacture of radio, television and communication equipment and apparatus
	i33	Manufacture of medical, precision and optical instruments, watches and clocks
	i34	Manufacture of motor vehicles, trailers and semi-trailers
	i35	Manufacture of other transport equipment
	i36	Manufacture of furniture; manufacturing n.e.c.
	i37	Recycling of waste and scrap
	i37.w.1	Recycling of bottles by direct reuse
	i40.11.a	Production of electricity by coal
	i40.11.b	Production of electricity by gas
	i40.11.c	Production of electricity by nuclear
	i40.11.d	Production of electricity by hydro
	i40.11.e	Production of electricity by wind
	i40.11.f	Production of electricity by petroleum and other oil derivatives
	i40.11.g	Production of electricity by biomass and waste
	i40.11.h	Production of electricity by solar photovoltaic
	i40.11.i	Production of electricity by solar thermal
	i40.11.j	Production of electricity by tide, wave, ocean
	i40.11.k	Production of electricity by Geothermal
	i40.11.l	Production of electricity nec
	i40.12	Transmission of electricity
	i40.13	Distribution and trade of electricity
	i40.2	Manufacture of gas; distribution of gaseous fuels through mains
	i40.3	Steam and hot water supply
	i41	Collection, purification and distribution of water
	i45	Construction
	i45.w	Re-processing of secondary construction material into aggregates
	i50.a	Sale, maintenance, repair of motor vehicles, motor vehicles parts, motorcycles, motor cycles parts and accessoiries
	i50.b	Retail sale of automotive fuel
	i51	Wholesale trade and commission trade, except of motor vehicles and motorcycles
	i52	Retail trade, except of motor vehicles and motorcycles; repair of personal and household goods
	i55	Hotels and restaurants
	i60.1	Transport via railways
	i60.2	Other land transport
	i60.3	Transport via pipelines
	i61.1	Sea and coastal water transport
	i61.2	Inland water transport
	i62	Air transport
	i63	Supporting and auxiliary transport activities; activities of travel agencies
	i64	Post and telecommunications
	i65	Financial intermediation, except insurance and pension funding
	i66	Insurance and pension funding, except compulsory social security
	i67	Activities auxiliary to financial intermediation
	i70	Real estate activities
	i71	Renting of machinery and equipment without operator and of personal and household goods
	i72	Computer and related activities
	i73	Research and development
	i74	Other business activities
	i75	Public administration and defence; compulsory social security
	i80	Education
	i85	Health and social work
	i90.1.a	Incineration of waste: Food
	i90.1.b	Incineration of waste: Paper
	i90.1.c	Incineration of waste: Plastic
	i90.1.d	Incineration of waste: Metals and Inert materials
	i90.1.e	Incineration of waste: Textiles
	i90.1.f	Incineration of waste: Wood
	i90.1.g	Incineration of waste: Oil/Hazardous waste
	i90.3.a	Biogasification of food waste, incl. land application
	i90.3.b	Biogasification of paper, incl. land application
	i90.3.c	Biogasification of sewage slugde, incl. land application
	i90.4.a	Composting of food waste, incl. land application
	i90.4.b	Composting of paper and wood, incl. land application
	i90.5.a	Waste water treatment, food
	i90.5.b	Waste water treatment, other
	i90.6.a	Landfill of waste: Food
	i90.6.b	Landfill of waste: Paper
	i90.6.c	Landfill of waste: Plastic
	i90.6.d	Landfill of waste: Inert/metal/hazardous
	i90.6.e	Landfill of waste: Textiles
	i90.6.f	Landfill of waste: Wood
	i91	Activities of membership organisation n.e.c.
	i92	Recreational, cultural and sporting activities
	i93	Other service activities
	i95	Private households with employed persons

## Sheet: Elast_0D
Industry	e_KK	e_KL	e_KE	e_KM	e_KS	e_LK	e_LL	e_LE	e_LM	e_LS	e_EK	e_EL	e_EE	e_EM	e_ES	e_MK	e_ML	e_ME	e_MM	e_MS	e_SK	e_SL	e_SE	e_SM	e_SS
i01.a i01.b i01.c i01.d i01.e i01.f i01.g i01.h i01.i i01.j i01.k i01.l i01.m i01.n i01.o i02 i05	-0.829693	0.149336	0.0998938	0.287295	0.293168	0.16996	-0.789225	0.0526301	0.302449	0.264186	0.289727	0.134122	-1.27483	0.605178	0.245798	0.14652	0.13553	0.106414	-0.662971	0.274506	0.20359	0.1612	0.0588529	0.373788	-0.797432
i10 i11.a i11.b i11.c i12 i13.1 i13.20.11 i13.20.12 i13.20.13 i13.20.14 i13.20.15 i13.20.16 i14.1 i14.2 i14.3	-0.928971	0.248913	0.0172856	0.153454	0.509318	0.171025	-0.656226	0.039711	0.16983	0.27566	0.0650459	0.217488	-1.0635	0.153339	0.627623	0.166343	0.267935	0.0441714	-0.881015	0.402566	0.340086	0.267893	0.111368	0.247976	-0.967324
i15.a i15.b i15.c i15.d i15.e i15.f i15.g i15.h i15.i i15.j i15.k i16 i17 i18 i19 i20 i20.w i21.1 i21.w.1 i21.2 i22 i36 i37 i37.w.1	-0.962417	0.178991	0.094847	0.43232	0.256259	0.0465682	-0.858777	0.079463	0.563644	0.169102	0.157767	0.50804	-1.31231	-0.0267234	0.67323	0.0500811	0.250965	-0.00186109	-0.669477	0.370292	0.0476174	0.120775	0.075207	0.59397	-0.837569
i23.1 i23.2 i23.3 i24.1 i24.1.w i24.2 i24.3 i24.4 i25 i26.a i26.w.1 i26.b i26.c i26.d i26.d.w i26.e i27.a i27.a.w i27.41 i27.41.w i27.42 i27.42.w i27.43 i27.43.w i27.44 i27.44.w i27.45 i27.45.w i27.5 i28	-0.93636	0.166943	0.156379	0.406616	0.206422	0.0493385	-0.89379	0.257552	0.489333	0.0975655	0.0742226	0.413622	-1.20116	0.214783	0.498537	0.0683682	0.278391	0.0760872	-0.682525	0.259678	0.0564457	0.0902717	0.28722	0.422318	-0.856255
i29 i30 i31 i32 i33 i34 i35	-0.911667	0.256368	-0.0524399	0.517989	0.18975	0.0539835	-0.812759	0.00115307	0.593041	0.164581	-0.211292	0.0220637	-0.771698	0.271309	0.689617	0.0516448	0.280797	0.00671351	-0.617762	0.278606	0.0416175	0.171426	0.0375387	0.612883	-0.863465
i40.11.a i40.11.b i40.11.c i40.11.d i40.11.e i40.11.f i40.11.g i40.11.h i40.11.i i40.11.j i40.11.k i40.11.l i40.12 i40.13 i40.2 i40.3	-0.715314	0.143966	0.268934	0.0856949	0.216719	0.202164	-0.82253	0.371552	0.0643025	0.184512	0.236689	0.232866	-0.735473	0.0832522	0.182666	0.202553	0.108235	0.223587	-0.778389	0.244014	0.239445	0.145173	0.229315	0.114061	-0.727994
i41 i90.1.a i90.1.b i90.1.c i90.1.d i90.1.e i90.1.f i90.1.g i90.3.a i90.3.b i90.3.c i90.4.a i90.4.b i90.5.a i90.5.b i90.6.a i90.6.b i90.6.c i90.6.d i90.6.e i90.6.f	-0.777765	0.243646	0.0134463	0.106108	0.414566	0.179549	-0.718536	0.0159171	0.11111	0.41196	0.0664799	0.10679	-1.15147	-0.00071516	0.978915	0.151953	0.21592	-0.000207147	-0.894856	0.52719	0.157933	0.212966	0.0754285	0.140244	-0.586571
i45 i45.w	-0.940436	0.224354	0.112523	0.521651	0.0819083	0.0413009	-0.703901	0.0203214	0.448124	0.194155	0.292745	0.287195	-1.41789	0.400541	0.437408	0.0605703	0.282652	0.0178763	-0.586935	0.225837	0.020522	0.264249	0.0421239	0.48731	-0.814205
i50.a i50.b i51 i52	-0.86905	0.647215	0.0284485	0.0122543	0.181133	0.101763	-0.337999	0.0168199	0.0290058	0.19041	0.213815	0.804007	-1.20914	-0.0461688	0.237491	0.0386717	0.582165	-0.0193854	-0.769546	0.168094	0.101098	0.675918	0.0176366	0.0297299	-0.824383
i55 i64 i70 i71 i72 i73 i74 i91 i92 i93 i95	-0.807689	0.314868	0.0237764	0.0988025	0.370242	0.160806	-0.671963	0.0124025	0.100604	0.398151	0.247188	0.252475	-1.116	-0.0180431	0.634384	0.157788	0.314592	-0.00277162	-0.926918	0.45731	0.168161	0.354089	0.0277146	0.13006	-0.680024
i60.1 i60.2 i60.3 i61.1 i61.2 i62 i63	-0.983301	0.24749	0.256091	0.0188043	0.460915	0.095876	-0.760301	0.0576657	0.0303174	0.576442	0.512727	0.298028	-1.32597	0.040641	0.474577	0.105228	0.43794	0.113592	-0.903015	0.246254	0.137701	0.44455	0.070816	0.0131469	-0.666214
i65 i66 i67	-0.959894	0.301371	0.020962	0.0952013	0.54236	0.0750963	-0.66411	0.00750465	0.0241035	0.557406	0.189897	0.272834	-1.04148	0.015036	0.563715	0.213977	0.217414	0.00373053	-1.07187	0.636746	0.0837244	0.345318	0.00960592	0.0437327	-0.482381
i75 i80 i85	-0.931395	0.531051	0.0196515	0.0483328	0.33236	0.0872437	-0.465931	0.0234901	0.113621	0.241576	0.0741336	0.539394	-1.13904	-0.0926794	0.61819	0.0366822	0.524896	-0.0186456	-0.91329	0.370357	0.115077	0.509137	0.0567388	0.168961	-0.849914

## Sheet: Elast_1D
Industry	e_KK	e_KL	e_KE	e_KM	e_KS	e_LK	e_LL	e_LE	e_LM	e_LS	e_EK	e_EL	e_EE	e_EM	e_ES	e_MK	e_ML	e_ME	e_MM	e_MS	e_SK	e_SL	e_SE	e_SM	e_SS
i01.a i01.b i01.c i01.d i01.e i01.f i01.g i01.h i01.i i01.j i01.k i01.l i01.m i01.n i01.o	-0.828107	0.121825	0.108283	0.306101	0.291899	0.164325	-0.794701	0.0510077	0.306573	0.272795	0.334563	0.116839	-1.25293	0.487294	0.314236	0.163902	0.121699	0.0844487	-0.655091	0.285042	0.211181	0.146316	0.07358	0.385134	-0.81621
i02	-1.26657	0.329199	0.226648	0.529158	0.181561	0.138488	-0.709277	0.0536487	0.266998	0.250143	0.493237	0.277529	-1.25791	0.280715	0.206429	0.195519	0.234508	0.0476612	-0.755899	0.278211	0.0830547	0.272004	0.0433919	0.34444	-0.742891
i05	-0.866263	0.255273	0.291873	0.409998	-0.0908808	0.167772	-0.64424	0.131403	0.25101	0.0940549	0.373826	0.256075	-1.44295	0.670649	0.142405	0.210057	0.195673	0.268271	-0.751719	0.0777186	-0.0403266	0.0635018	0.0493366	0.0673116	-0.139823
i10 i11.a i11.b i11.c i12	-0.822478	0.28063	0.0651341	0.143536	0.333179	0.188834	-0.649993	0.112517	0.104726	0.243916	0.135608	0.348137	-0.875464	0.160733	0.230986	0.170081	0.184419	0.0914793	-0.988053	0.542074	0.158963	0.172947	0.0529332	0.218264	-0.603108
i13.1 i13.20.11 i13.20.12 i13.20.13 i13.20.14 i13.20.15 i13.20.16 i14.1 i14.2 i14.3	-0.952748	0.261095	0.00174864	0.141379	0.548525	0.150663	-0.679839	0.0410636	0.183928	0.304184	0.00586965	0.23887	-1.02333	0.204295	0.574298	0.119379	0.269141	0.0513909	-0.886274	0.446363	0.336176	0.323071	0.104856	0.32398	-1.08808
i15.a i15.b i15.c i15.d i15.e i15.f i15.g i15.h i15.i i15.j i15.k i16	-0.954526	0.094656	0.0708726	0.602873	0.186124	0.0312346	-0.91008	0.0635428	0.63662	0.178682	0.132392	0.359718	-1.23766	0.0100158	0.735531	0.0521123	0.166766	0.000463466	-0.534751	0.315409	0.0301239	0.0876398	0.0637272	0.590564	-0.772055
i17 i18 i19	-0.955902	0.309965	0.0824437	0.409834	0.153659	0.0622338	-0.822166	0.124662	0.421235	0.214035	0.0890625	0.670748	-1.31233	0.0761714	0.476344	0.0633504	0.324304	0.0108993	-0.686985	0.288431	0.0305053	0.211637	0.087539	0.370441	-0.700122
i20 i20.w	-1.00012	0.17075	0.234948	0.484882	0.109543	0.0347222	-0.814474	0.0941208	0.500395	0.185236	0.191421	0.377101	-1.17554	0.469171	0.137848	0.0516259	0.261998	0.0613118	-0.713614	0.338678	0.0212188	0.176447	0.0327731	0.616156	-0.846595
i21.1 i21.w.1 i21.2 i22	-0.954917	0.241373	0.0438565	0.347342	0.322345	0.063329	-0.734172	0.0141292	0.42022	0.236494	0.158562	0.194701	-1.00782	0.0669616	0.587595	0.0658174	0.303492	0.00350949	-0.657522	0.284703	0.0822344	0.229953	0.0414616	0.383303	-0.736952
i23.1 i23.2 i23.3	-0.562827	0.0797863	0.466125	0.0390857	-0.0221701	0.0617742	-0.645406	0.575366	0.0153926	-0.00712771	0.034762	0.0554203	-0.412023	0.0681669	0.253673	0.0258526	0.0131499	0.604586	-0.998331	0.354743	-0.00484846	-0.0020133	0.74389	0.117291	-0.854319
i24.1 i24.1.w i24.2 i24.3 i24.4	-0.940987	0.259606	0.135696	0.234195	0.31149	0.096014	-0.76549	0.156505	0.27139	0.241582	0.170087	0.530408	-1.27151	0.127468	0.44355	0.0926328	0.290242	0.040224	-0.755724	0.332626	0.103516	0.217074	0.117599	0.279469	-0.717659
i25 i26.a i26.w.1 i26.b i26.c i26.d i26.d.w i26.e	-0.899725	0.226152	0.0951146	0.391627	0.186832	0.0588032	-0.747589	0.0350492	0.458579	0.195157	0.174768	0.24768	-1.26772	0.274089	0.571182	0.0549301	0.247373	0.0209226	-0.558719	0.235494	0.0525351	0.211048	0.0874093	0.472106	-0.823099
i27.a i27.a.w i27.41 i27.41.w i27.42 i27.42.w i27.43 i27.43.w i27.44 i27.44.w i27.45 i27.45.w i27.5	-0.963267	0.270973	0.052477	0.532826	0.106991	0.0904338	-0.933237	0.0430093	0.639225	0.16057	0.0486283	0.11942	-0.991308	0.419322	0.403937	0.0513552	0.184606	0.043614	-0.545443	0.265868	0.021027	0.094556	0.0856691	0.542124	-0.743376
i28	-0.995916	0.248443	0.035911	0.480661	0.230901	0.0419323	-0.751707	0.00757357	0.554733	0.147468	0.114703	0.143327	-0.94505	0.385902	0.301117	0.0532249	0.363947	0.0133784	-0.627982	0.197431	0.0618106	0.233891	0.0252361	0.477284	-0.798221
i29	-0.913023	0.325108	-0.0805261	0.472284	0.196157	0.0586571	-0.755217	8.80206e-06	0.537017	0.159534	-0.305043	0.000184806	-0.640214	-0.0182716	0.963344	0.0487853	0.307456	-0.000498241	-0.615305	0.259562	0.042569	0.191889	0.0551882	0.54531	-0.834956
i30 i31 i32 i33	-0.897928	0.281942	-0.0412555	0.458078	0.199164	0.0609654	-0.779483	-0.00299197	0.493402	0.228108	-0.181643	-0.0609213	-0.685268	0.348984	0.578848	0.0598595	0.298175	0.0103577	-0.678255	0.309863	0.0438092	0.232043	0.0289189	0.521591	-0.826362
i34 i35	-0.911962	0.181705	-0.0567946	0.626639	0.160413	0.0420759	-0.837251	0.0110627	0.660793	0.123319	-0.198544	0.16701	-1.01014	0.411992	0.62968	0.0499642	0.227531	0.0093968	-0.504916	0.218025	0.0376383	0.124955	0.042263	0.641586	-0.846442
i36 i37 i37.w.1	-0.950149	0.237521	0.105837	0.238523	0.368268	0.0417681	-0.824484	0.142245	0.394624	0.245846	0.0858441	0.656101	-1.56269	-0.0260077	0.846751	0.0311616	0.293178	-0.00418905	-0.690879	0.370729	0.0545963	0.207263	0.154768	0.420694	-0.837321
i40.11.a i40.11.b i40.11.c i40.11.d i40.11.e i40.11.f i40.11.g i40.11.h i40.11.i i40.11.j i40.11.k i40.11.l i40.12 i40.13	-0.666357	0.146172	0.248665	0.0596024	0.211917	0.257736	-0.833649	0.376252	0.0496853	0.149975	0.262322	0.225105	-0.765065	0.101487	0.17615	0.18003	0.0851133	0.290587	-0.745223	0.189493	0.310062	0.124448	0.244313	0.0917893	-0.770612
i40.2 i40.3	-0.898011	0.179333	0.387705	0.191285	0.139688	0.0806068	-0.758281	0.269688	0.131423	0.276563	0.115803	0.179213	-0.725168	0.130638	0.299514	0.124862	0.190858	0.285495	-0.894577	0.293362	0.0392875	0.173052	0.282027	0.1264	-0.620767
i41	-0.750597	0.297735	0.0483	0.115211	0.28935	0.353758	-0.877084	0.0571512	0.20275	0.263425	0.30102	0.299776	-1.19506	0.486219	0.108049	0.203335	0.301164	0.13769	-0.823666	0.181478	0.343942	0.263537	0.0206079	0.122227	-0.750314
i45 i45.w	-0.940436	0.224354	0.112523	0.521651	0.0819083	0.0413009	-0.703901	0.0203214	0.448124	0.194155	0.292745	0.287195	-1.41789	0.400541	0.437408	0.0605703	0.282652	0.0178763	-0.586935	0.225837	0.020522	0.264249	0.0421239	0.48731	-0.814205
i50.a i50.b	-0.847182	0.536508	-0.00741231	0.113351	0.204735	0.0886646	-0.419031	0.010855	0.0798719	0.239639	-0.037489	0.332206	-0.734788	0.111985	0.328086	0.133829	0.570615	0.0261418	-1.01279	0.282201	0.0925671	0.655612	0.0293293	0.108068	-0.885576
i51 i52	-0.857876	0.664063	0.0330372	-0.0166937	0.17747	0.101994	-0.303042	0.0165223	0.0115607	0.172965	0.286329	0.932324	-1.42431	0.0868654	0.118795	-0.0951875	0.429187	0.0571492	-0.653875	0.262727	0.108148	0.686252	0.00835268	0.0280783	-0.83083
i55	-0.852997	0.43678	-0.0290873	0.234187	0.211117	0.0779793	-0.514125	0.00947536	0.192554	0.234117	-0.112104	0.204549	-0.791691	0.04093	0.658317	0.0939817	0.432828	0.0042619	-0.708741	0.17767	0.0896462	0.556831	0.0725311	0.187993	-0.907002
i60.1 i60.2 i60.3	-1.04017	0.298503	0.394138	0.0365158	0.31101	0.103191	-0.610865	0.0904591	0.0375467	0.379668	0.515065	0.341958	-1.23345	-0.0676597	0.444086	0.210427	0.625893	-0.298358	-0.66122	0.123258	0.117234	0.413991	0.128095	0.00806259	-0.667383
i61.1 i61.2	-0.900141	0.303313	0.0671376	-0.0138389	0.54353	0.244131	-0.905412	-0.00334819	0.0350792	0.629551	0.401232	-0.0248604	-0.991084	-0.181381	0.796093	-0.0598115	0.188365	-0.131173	-0.824119	0.826739	0.152714	0.219763	0.0374274	0.0537454	-0.46365
i62	-1.01173	0.183022	0.288847	-0.0296878	0.569554	0.0893892	-0.826656	0.127336	0.0539285	0.556002	0.325497	0.293799	-1.29976	0.0974059	0.583062	-0.0781175	0.290542	0.227445	-0.595083	0.155214	0.120439	0.240728	0.109412	0.0124736	-0.483053
i63	-0.863938	0.2784	0.0700581	0.0545015	0.460978	0.100091	-0.680878	0.014003	0.00998053	0.556803	0.407212	0.22639	-1.1763	-0.1845	0.7272	0.258602	0.131719	-0.150611	-0.882963	0.643253	0.12256	0.41176	0.033263	0.0360436	-0.603626
i64	-0.806485	0.460652	0.000848318	-0.0241941	0.369179	0.275916	-0.646701	0.00607518	0.0339606	0.330749	0.020217	0.24172	-0.665954	-0.200043	0.60406	-0.137522	0.322281	-0.0477122	-0.903592	0.766546	0.207176	0.309883	0.0142241	0.0756795	-0.606963
i65 i66 i67	-0.959894	0.301371	0.020962	0.0952013	0.54236	0.0750963	-0.66411	0.00750465	0.0241035	0.557406	0.189897	0.272834	-1.04148	0.015036	0.563715	0.213977	0.217414	0.00373053	-1.07187	0.636746	0.0837244	0.345318	0.00960592	0.0437327	-0.482381
i70 i71 i72 i73 i74	-0.751601	0.26599	0.0221472	0.0874539	0.376009	0.188248	-0.717436	0.00979824	0.104602	0.414788	0.34992	0.218743	-1.31171	-0.193001	0.936053	0.186476	0.315149	-0.0260467	-0.774264	0.298685	0.198712	0.309732	0.0313094	0.0740279	-0.613781
i75 i80 i85	-0.931395	0.531051	0.0196515	0.0483328	0.33236	0.0872437	-0.465931	0.0234901	0.113621	0.241576	0.0741336	0.539394	-1.13904	-0.0926794	0.61819	0.0366822	0.524896	-0.0186456	-0.91329	0.370357	0.115077	0.509137	0.0567388	0.168961	-0.849914
i90.1.a i90.1.b i90.1.c i90.1.d i90.1.e i90.1.f i90.1.g i90.3.a i90.3.b i90.3.c i90.4.a i90.4.b i90.5.a i90.5.b i90.6.a i90.6.b i90.6.c i90.6.d i90.6.e i90.6.f	-0.885312	0.306718	0.00466119	0.146685	0.427248	0.173914	-0.728856	-0.0126033	0.101761	0.465784	0.0190887	-0.0910263	-0.854272	-0.041638	0.967847	0.186428	0.228092	-0.0129221	-0.91387	0.512272	0.110697	0.212836	0.0612328	0.104432	-0.489198
i91 i92 i93 i95	-0.952904	0.284186	0.0634146	0.125761	0.479543	0.0628473	-0.692258	0.0320491	0.114564	0.482798	0.168759	0.385665	-1.08077	0.207355	0.318992	0.0934445	0.38492	0.0578951	-0.973147	0.436887	0.0814889	0.370982	0.0203691	0.0999157	-0.572755

## Sheet: Elast_2D
Industry	e_KK	e_KL	e_KE	e_KM	e_KS	e_LK	e_LL	e_LE	e_LM	e_LS	e_EK	e_EL	e_EE	e_EM	e_ES	e_MK	e_ML	e_ME	e_MM	e_MS	e_SK	e_SL	e_SE	e_SM	e_SS
i01.a i01.b i01.c i01.d i01.e i01.f i01.g i01.h	-0.763127	0.197453	0.113065	0.166427	0.286181	0.241126	-0.730978	0.0597994	0.0990243	0.331028	0.290475	0.125805	-1.11896	0.296371	0.406307	0.137764	0.0671237	0.0954927	-0.661187	0.360806	0.198102	0.187644	0.109477	0.301723	-0.796946
i01.i i01.j i01.k i01.l i01.m i01.n i01.o	-0.868168	0.0915901	0.110023	0.420026	0.246529	0.137136	-0.829248	0.0132437	0.4976	0.181269	0.398795	0.0320606	-1.36345	0.605899	0.326694	0.1564	0.123748	0.0622439	-0.574686	0.232294	0.178489	0.0876521	0.065256	0.45167	-0.783066
i02	-1.26657	0.329199	0.226648	0.529158	0.181561	0.138488	-0.709277	0.0536487	0.266998	0.250143	0.493237	0.277529	-1.25791	0.280715	0.206429	0.195519	0.234508	0.0476612	-0.755899	0.278211	0.0830547	0.272004	0.0433919	0.34444	-0.742891
i05	-0.866263	0.255273	0.291873	0.409998	-0.0908808	0.167772	-0.64424	0.131403	0.25101	0.0940549	0.373826	0.256075	-1.44295	0.670649	0.142405	0.210057	0.195673	0.268271	-0.751719	0.0777186	-0.0403266	0.0635018	0.0493366	0.0673116	-0.139823
i10 i11.a i11.b i11.c i12	-0.822478	0.28063	0.0651341	0.143536	0.333179	0.188834	-0.649993	0.112517	0.104726	0.243916	0.135608	0.348137	-0.875464	0.160733	0.230986	0.170081	0.184419	0.0914793	-0.988053	0.542074	0.158963	0.172947	0.0529332	0.218264	-0.603108
i13.1 i13.20.11 i13.20.12 i13.20.13 i13.20.14 i13.20.15 i13.20.16	-0.901254	0.244166	-0.0970036	0.256236	0.497855	0.215666	-0.721694	0.00140409	0.166277	0.338346	-0.423761	0.00694433	-1.09841	0.550507	0.964717	0.281864	0.207078	0.138621	-0.832474	0.204911	0.241069	0.185483	0.106932	0.0901998	-0.623684
i14.1 i14.2 i14.3	-0.936199	0.353812	0.00457371	0.168963	0.40885	0.145079	-0.632012	0.0468848	0.191002	0.249046	0.0114655	0.286631	-0.984563	0.219142	0.467324	0.120111	0.331127	0.0621428	-0.896657	0.383276	0.211468	0.314143	0.0964216	0.278871	-0.900904
i15.a i15.b i15.c i15.d i15.e i15.f i15.g i15.h i15.i i15.j i15.k	-0.981179	0.0958706	0.0793783	0.610884	0.195046	0.0299802	-0.913992	0.0640495	0.655848	0.164114	0.138701	0.357887	-1.23568	0.0427593	0.696331	0.0493187	0.16932	0.00197563	-0.53032	0.309706	0.0302803	0.0814743	0.0618672	0.595551	-0.769173
i16	-0.644418	0.185825	0.00450814	0.315681	0.138404	0.166795	-0.880165	0.00604799	0.211392	0.49593	0.0419317	0.0626725	-1.06179	0.085889	0.871292	0.173961	0.129781	0.00508857	-0.643604	0.334773	0.051447	0.205377	0.0348201	0.225818	-0.517463
i17 i18	-0.956521	0.322925	0.0838982	0.384364	0.165335	0.0675302	-0.822931	0.130401	0.414551	0.210449	0.0903806	0.671747	-1.27219	0.0849455	0.425112	0.0649954	0.335213	0.0133339	-0.70141	0.287868	0.0351551	0.213981	0.0839084	0.361974	-0.695019
i19	-1.05166	0.255031	-0.0265901	0.431458	0.391766	0.0395653	-0.773926	0.0312575	0.406403	0.2967	-0.0523799	0.396897	-1.56289	0.0450991	1.17328	0.0397219	0.241172	0.00210772	-0.631834	0.348833	0.0422093	0.206052	0.0641706	0.408232	-0.720664
i20 i20.w	-1.00012	0.17075	0.234948	0.484882	0.109543	0.0347222	-0.814474	0.0941208	0.500395	0.185236	0.191421	0.377101	-1.17554	0.469171	0.137848	0.0516259	0.261998	0.0613118	-0.713614	0.338678	0.0212188	0.176447	0.0327731	0.616156	-0.846595
i21.1 i21.w.1 i21.2	-0.888045	0.116357	0.11735	0.551101	0.103236	0.0442516	-0.782749	0.00639348	0.523086	0.209018	0.288325	0.0413049	-1.0619	0.192644	0.539632	0.0857522	0.214019	0.0122003	-0.505171	0.1932	0.0365986	0.194841	0.0778628	0.440173	-0.749475
i22	-0.985566	0.326562	0.000708275	0.205317	0.452979	0.0664452	-0.687383	0.00759507	0.337158	0.276184	0.00383789	0.202267	-0.817333	0.332357	0.278871	0.0458669	0.370179	0.0137022	-0.808351	0.378604	0.0947461	0.283912	0.0107646	0.354481	-0.743904
i23.1 i23.2 i23.3	-0.562827	0.0797863	0.466125	0.0390857	-0.0221701	0.0617742	-0.645406	0.575366	0.0153926	-0.00712771	0.034762	0.0554203	-0.412023	0.0681669	0.253673	0.0258526	0.0131499	0.604586	-0.998331	0.354743	-0.00484846	-0.0020133	0.74389	0.117291	-0.854319
i24.1 i24.1.w i24.2 i24.3 i24.4	-0.940987	0.259606	0.135696	0.234195	0.31149	0.096014	-0.76549	0.156505	0.27139	0.241582	0.170087	0.530408	-1.27151	0.127468	0.44355	0.0926328	0.290242	0.040224	-0.755724	0.332626	0.103516	0.217074	0.117599	0.279469	-0.717659
i25	-0.870368	0.213419	0.0386149	0.487242	0.131093	0.0501864	-0.758662	0.0164752	0.522628	0.169372	0.100878	0.183028	-1.21206	0.45933	0.468826	0.0517184	0.235907	0.0186631	-0.483413	0.177124	0.0408597	0.224494	0.0559354	0.520108	-0.841398
i26.a i26.w.1 i26.b i26.c i26.d i26.d.w i26.e	-0.98778	0.221022	0.133307	0.364358	0.269093	0.0645391	-0.741951	0.0591761	0.376427	0.241809	0.192623	0.292828	-1.35671	0.196324	0.674938	0.0753493	0.26659	0.0280977	-0.657119	0.287082	0.0690838	0.212598	0.119918	0.356394	-0.757994
i27.a i27.a.w	-0.994303	0.333943	0.0608511	0.488934	0.110575	0.135955	-0.978729	0.13652	0.582003	0.124251	0.055826	0.307639	-1.06623	0.40161	0.301154	0.0735743	0.215119	0.0658738	-0.578521	0.223954	0.0367802	0.101515	0.109188	0.495038	-0.742521
i27.41 i27.41.w i27.42 i27.42.w i27.43 i27.43.w i27.44 i27.44.w i27.45 i27.45.w i27.5	-0.949626	0.294048	-0.0437462	0.564648	0.134676	0.0776331	-0.930908	0.0287137	0.68568	0.138881	-0.0394896	0.0981756	-1.12126	0.435697	0.626875	0.0355493	0.163511	0.0303875	-0.495314	0.265867	0.0189878	0.0741652	0.0979094	0.595384	-0.786446
i28	-0.995916	0.248443	0.035911	0.480661	0.230901	0.0419323	-0.751707	0.00757357	0.554733	0.147468	0.114703	0.143327	-0.94505	0.385902	0.301117	0.0532249	0.363947	0.0133784	-0.627982	0.197431	0.0618106	0.233891	0.0252361	0.477284	-0.798221
i29	-0.913023	0.325108	-0.0805261	0.472284	0.196157	0.0586571	-0.755217	8.80206e-06	0.537017	0.159534	-0.305043	0.000184806	-0.640214	-0.0182716	0.963344	0.0487853	0.307456	-0.000498241	-0.615305	0.259562	0.042569	0.191889	0.0551882	0.54531	-0.834956
i30 i32 i33	-0.906876	0.31867	-0.0388977	0.359921	0.267183	0.0687237	-0.738003	-0.00387447	0.403418	0.269735	-0.235105	-0.108589	-0.936106	0.01355	1.26625	0.0535816	0.278483	0.00033374	-0.658319	0.32592	0.0549648	0.257305	0.043098	0.45038	-0.805747
i31	-0.892288	0.243835	-0.0573622	0.516973	0.188842	0.0510608	-0.81665	0.0191032	0.579661	0.166826	-0.173288	0.275586	-0.920418	0.398078	0.420042	0.0586996	0.314304	0.0149621	-0.629712	0.241746	0.046908	0.197888	0.034538	0.528859	-0.808192
i34 i35	-0.911962	0.181705	-0.0567946	0.626639	0.160413	0.0420759	-0.837251	0.0110627	0.660793	0.123319	-0.198544	0.16701	-1.01014	0.411992	0.62968	0.0499642	0.227531	0.0093968	-0.504916	0.218025	0.0376383	0.124955	0.042263	0.641586	-0.846442
i36 i37 i37.w.1	-0.950149	0.237521	0.105837	0.238523	0.368268	0.0417681	-0.824484	0.142245	0.394624	0.245846	0.0858441	0.656101	-1.56269	-0.0260077	0.846751	0.0311616	0.293178	-0.00418905	-0.690879	0.370729	0.0545963	0.207263	0.154768	0.420694	-0.837321
i40.11.a i40.11.b i40.11.f	-0.671824	0.192608	0.128744	0.0938128	0.256659	0.136641	-0.812165	0.298453	0.0881453	0.288926	0.0504774	0.164946	-0.620317	0.110617	0.294276	0.0956399	0.126669	0.287627	-0.799807	0.289871	0.118283	0.187694	0.345901	0.131037	-0.782915
i40.11.c i40.11.d i40.11.g i40.11.i i40.11.j i40.11.k i40.11.l	-0.635854	0.154185	0.186598	0.107878	0.187193	0.320782	-0.871824	0.307764	0.0750669	0.168211	0.368531	0.292156	-0.66634	-0.0191305	0.0247839	0.398884	0.133411	-0.0358158	-0.657334	0.160854	0.355111	0.153376	0.0238055	0.0825266	-0.614819
i40.11.e i40.11.h	-0.400533	0.0901798	0.040679	0.0916574	0.178017	0.542297	-1.02754	0.0876209	0.0890834	0.308539	0.307999	0.110321	-1.15983	-0.193879	0.935391	0.52995	0.0856518	-0.148053	-1.10991	0.642357	0.226891	0.0653941	0.15746	0.141601	-0.591346
i40.12 i40.13	-0.63308	0.125394	0.283868	0.0459654	0.177853	0.312232	-0.840747	0.379666	0.0334552	0.115393	0.322252	0.173093	-0.75312	0.10303	0.154745	0.174041	0.0508726	0.343643	-0.631577	0.0630196	0.350856	0.0914214	0.268909	0.032834	-0.744021
i40.2 i40.3	-0.898011	0.179333	0.387705	0.191285	0.139688	0.0806068	-0.758281	0.269688	0.131423	0.276563	0.115803	0.179213	-0.725168	0.130638	0.299514	0.124862	0.190858	0.285495	-0.894577	0.293362	0.0392875	0.173052	0.282027	0.1264	-0.620767
i41	-0.750597	0.297735	0.0483	0.115211	0.28935	0.353758	-0.877084	0.0571512	0.20275	0.263425	0.30102	0.299776	-1.19506	0.486219	0.108049	0.203335	0.301164	0.13769	-0.823666	0.181478	0.343942	0.263537	0.0206079	0.122227	-0.750314
i45 i45.w	-0.940436	0.224354	0.112523	0.521651	0.0819083	0.0413009	-0.703901	0.0203214	0.448124	0.194155	0.292745	0.287195	-1.41789	0.400541	0.437408	0.0605703	0.282652	0.0178763	-0.586935	0.225837	0.020522	0.264249	0.0421239	0.48731	-0.814205
i50.a i50.b	-0.847182	0.536508	-0.00741231	0.113351	0.204735	0.0886646	-0.419031	0.010855	0.0798719	0.239639	-0.037489	0.332206	-0.734788	0.111985	0.328086	0.133829	0.570615	0.0261418	-1.01279	0.282201	0.0925671	0.655612	0.0293293	0.108068	-0.885576
i51 i52	-0.857876	0.664063	0.0330372	-0.0166937	0.17747	0.101994	-0.303042	0.0165223	0.0115607	0.172965	0.286329	0.932324	-1.42431	0.0868654	0.118795	-0.0951875	0.429187	0.0571492	-0.653875	0.262727	0.108148	0.686252	0.00835268	0.0280783	-0.83083
i55	-0.852997	0.43678	-0.0290873	0.234187	0.211117	0.0779793	-0.514125	0.00947536	0.192554	0.234117	-0.112104	0.204549	-0.791691	0.04093	0.658317	0.0939817	0.432828	0.0042619	-0.708741	0.17767	0.0896462	0.556831	0.0725311	0.187993	-0.907002
i60.1 i60.2 i60.3	-1.04017	0.298503	0.394138	0.0365158	0.31101	0.103191	-0.610865	0.0904591	0.0375467	0.379668	0.515065	0.341958	-1.23345	-0.0676597	0.444086	0.210427	0.625893	-0.298358	-0.66122	0.123258	0.117234	0.413991	0.128095	0.00806259	-0.667383
i61.1 i61.2	-0.900141	0.303313	0.0671376	-0.0138389	0.54353	0.244131	-0.905412	-0.00334819	0.0350792	0.629551	0.401232	-0.0248604	-0.991084	-0.181381	0.796093	-0.0598115	0.188365	-0.131173	-0.824119	0.826739	0.152714	0.219763	0.0374274	0.0537454	-0.46365
i62	-1.01173	0.183022	0.288847	-0.0296878	0.569554	0.0893892	-0.826656	0.127336	0.0539285	0.556002	0.325497	0.293799	-1.29976	0.0974059	0.583062	-0.0781175	0.290542	0.227445	-0.595083	0.155214	0.120439	0.240728	0.109412	0.0124736	-0.483053
i63	-0.863938	0.2784	0.0700581	0.0545015	0.460978	0.100091	-0.680878	0.014003	0.00998053	0.556803	0.407212	0.22639	-1.1763	-0.1845	0.7272	0.258602	0.131719	-0.150611	-0.882963	0.643253	0.12256	0.41176	0.033263	0.0360436	-0.603626
i64	-0.806485	0.460652	0.000848318	-0.0241941	0.369179	0.275916	-0.646701	0.00607518	0.0339606	0.330749	0.020217	0.24172	-0.665954	-0.200043	0.60406	-0.137522	0.322281	-0.0477122	-0.903592	0.766546	0.207176	0.309883	0.0142241	0.0756795	-0.606963
i65	-0.900831	0.357195	0.0254546	0.0801498	0.438031	0.0937067	-0.626092	0.00591799	0.0232456	0.503221	0.313209	0.277574	-1.09693	-0.0156331	0.521784	0.236024	0.260933	-0.00374135	-1.1251	0.631881	0.0871438	0.381615	0.00843633	0.0426888	-0.519884
i66	-0.930354	0.223374	-0.00655015	-0.0187334	0.732264	0.0519141	-0.711266	0.0045195	0.0274053	0.627427	-0.0357116	0.106022	-0.82861	0.624988	0.133312	-0.028133	0.177085	0.172153	-0.833066	0.511962	0.0683281	0.251908	0.00228161	0.0318104	-0.354328
i67	-0.945304	0.390773	0.00852409	-0.0272036	0.57321	0.0853297	-0.657373	0.00658375	0.0224086	0.543051	0.0754253	0.266788	-1.19339	0.0940179	0.757157	-0.0566747	0.213797	0.0221363	-0.835053	0.655794	0.0751484	0.32604	0.0112182	0.0412678	-0.453674
i70	-0.499978	0.0704702	0.0207958	0.134936	0.273775	0.461788	-0.890689	0.00513856	0.0933501	0.330413	0.688329	0.0259552	-1.51019	0.205531	0.590371	0.421008	0.0444468	0.0193741	-0.785475	0.300646	0.461968	0.085082	0.030097	0.162597	-0.739744
i71 i72 i73 i74	-0.900214	0.360237	0.0292701	0.084993	0.425714	0.0746805	-0.626502	0.0116949	0.086599	0.453527	0.204729	0.394578	-1.31294	-0.499257	1.21289	0.105118	0.51664	-0.08828	-1.16144	0.627961	0.0788338	0.405115	0.0321114	0.0940226	-0.610083
i75	-0.895491	0.411319	0.0275784	0.087683	0.36891	0.119018	-0.551785	0.0248807	0.108736	0.299151	0.160532	0.500521	-1.07968	0.15469	0.263936	0.106123	0.454813	0.0321637	-0.953817	0.360717	0.169818	0.475904	0.0208722	0.137194	-0.803788
i80	-0.874794	0.680182	0.0468617	-0.0185422	0.166292	0.078106	-0.362897	0.0236439	0.0661118	0.195035	0.150843	0.662777	-1.31281	-0.0663264	0.565516	-0.0207173	0.643269	-0.0230225	-0.810286	0.210756	0.0646414	0.660226	0.0682932	0.0733241	-0.866485
i85	-0.968278	0.548573	0.0241094	0.0517505	0.343845	0.0543811	-0.461412	0.020415	0.152011	0.234605	0.0551875	0.471402	-1.10591	-0.115135	0.694456	0.0180406	0.534563	-0.0175344	-0.972144	0.437075	0.0702812	0.483727	0.0620107	0.256269	-0.872288
i90.1.a i90.1.b i90.1.c i90.1.d i90.1.e i90.1.f i90.1.g	-0.876092	0.300371	0.00677541	0.147594	0.421351	0.176065	-0.729305	-0.0203793	0.070127	0.503492	0.0280376	-0.143873	-0.906636	-0.10202	1.12449	0.186627	0.151278	-0.0311734	-0.890794	0.584062	0.107648	0.219452	0.0694246	0.118009	-0.514534
i90.3.a i90.3.b i90.3.c	-0.960605	0.26309	0.0483821	0.108205	0.540927	0.155223	-0.684204	-0.0462644	0.117051	0.458195	0.42045	-0.681436	-0.593417	-0.402611	1.25701	0.135457	0.248356	-0.0579973	-0.889211	0.563395	0.137242	0.197037	0.0366994	0.114185	-0.485163
i90.4.a i90.4.b	-0.861358	0.260722	0.0941012	0.0786959	0.427838	0.133159	-0.730225	0.0132532	0.111133	0.472679	0.167662	0.0462348	-1.10909	0.0849433	0.810248	0.0963852	0.266507	0.0583911	-0.949326	0.528042	0.0945838	0.204602	0.100534	0.095312	-0.495032
i90.5.a i90.5.b	-0.908262	0.295879	0.0642811	0.150469	0.397632	0.169707	-0.733997	0.000710212	0.124025	0.439556	0.156976	0.00302379	-0.978626	0.0166766	0.80195	0.184379	0.264964	0.00836802	-0.945697	0.487986	0.101515	0.195649	0.0838393	0.10167	-0.482674
i90.6.a i90.6.b i90.6.c i90.6.d i90.6.e i90.6.f	-0.903675	0.27548	0.00314916	0.123298	0.501748	0.157	-0.758454	-0.0060344	0.109687	0.497802	0.0175079	-0.0588661	-0.852428	0.169353	0.724433	0.150409	0.234781	0.0371595	-0.975039	0.552689	0.119259	0.207612	0.0309716	0.107689	-0.465532
i91 i92 i93 i95	-0.952904	0.284186	0.0634146	0.125761	0.479543	0.0628473	-0.692258	0.0320491	0.114564	0.482798	0.168759	0.385665	-1.08077	0.207355	0.318992	0.0934445	0.38492	0.0578951	-0.973147	0.436887	0.0814889	0.370982	0.0203691	0.0999157	-0.572755

## Sheet: Elast_3D
Industry	e_KK	e_KL	e_KE	e_KM	e_KS	e_LK	e_LL	e_LE	e_LM	e_LS	e_EK	e_EL	e_EE	e_EM	e_ES	e_MK	e_ML	e_ME	e_MM	e_MS	e_SK	e_SL	e_SE	e_SM	e_SS
i01.a i01.b i01.c	-0.728936	0.184933	0.106053	0.178859	0.259091	0.263882	-0.76399	0.06384	0.169944	0.266324	0.229464	0.0968031	-1.08931	0.267011	0.496032	0.156713	0.104353	0.108127	-0.73106	0.361868	0.179949	0.129632	0.159226	0.286848	-0.755655
i01.d i01.e	-0.759566	0.207115	0.112108	0.162051	0.278293	0.234904	-0.660542	0.0639896	0.0749884	0.28666	0.348714	0.175494	-1.1216	0.372673	0.224724	0.139292	0.0568311	0.102984	-0.671697	0.372591	0.221265	0.200954	0.0574414	0.344643	-0.824303
i01.f i01.g i01.h	-0.855527	0.0950207	0.107348	0.314726	0.338432	0.117353	-0.843004	0.113391	0.228792	0.383468	0.267919	0.229145	-1.17016	0.200303	0.472791	0.30101	0.177178	0.0767586	-1.1034	0.548451	0.178615	0.16387	0.0999787	0.302648	-0.745111
i01.i i01.n	-0.878255	0.0923471	0.0857903	0.441005	0.259113	0.129113	-0.849624	-0.00701689	0.513689	0.213838	0.330657	-0.0193436	-1.28151	0.623315	0.346882	0.141674	0.118032	0.0519535	-0.531533	0.219873	0.170391	0.100576	0.0591835	0.450074	-0.780225
i01.j i01.k i01.l	-0.83893	0.0971865	0.109004	0.395203	0.237537	0.15202	-0.763687	0.0106182	0.443833	0.157215	0.393331	0.0244947	-1.28325	0.526662	0.338763	0.176793	0.126931	0.065292	-0.619124	0.250108	0.196511	0.0831486	0.0776668	0.462529	-0.819855
i01.m i01.o	-0.694783	0.0787212	0.125866	0.224993	0.265202	0.234433	-0.827833	0.115424	0.236975	0.241001	0.517746	0.159432	-3.08161	0.311419	2.09301	0.32349	0.114411	0.108851	-0.846907	0.300155	0.151877	0.0463456	0.291394	0.119555	-0.609172
i02	-1.26657	0.329199	0.226648	0.529158	0.181561	0.138488	-0.709277	0.0536487	0.266998	0.250143	0.493237	0.277529	-1.25791	0.280715	0.206429	0.195519	0.234508	0.0476612	-0.755899	0.278211	0.0830547	0.272004	0.0433919	0.34444	-0.742891
i05	-0.866263	0.255273	0.291873	0.409998	-0.0908808	0.167772	-0.64424	0.131403	0.25101	0.0940549	0.373826	0.256075	-1.44295	0.670649	0.142405	0.210057	0.195673	0.268271	-0.751719	0.0777186	-0.0403266	0.0635018	0.0493366	0.0673116	-0.139823
i10	-0.78893	0.225367	0.0519462	0.257214	0.254403	0.096192	-0.700565	0.170482	0.243464	0.190427	0.0496191	0.381527	-0.828754	0.202345	0.195263	0.132759	0.294411	0.109337	-0.80445	0.267943	0.0787261	0.138063	0.063259	0.160647	-0.440696
i11.a i11.b i11.c	-0.628454	0.235367	0.131897	-0.0515892	0.312779	0.233595	-0.712446	0.044916	0.102071	0.331864	0.3242	0.11124	-1.37902	0.394704	0.548878	-0.129325	0.257816	0.402549	-1.16666	0.635623	0.138394	0.147953	0.098805	0.11219	-0.497342
i12	-0.814956	0.0541401	0.00693981	0.0607533	0.693122	0.0267884	-0.710592	0.123163	0.295714	0.264928	0.0119794	0.429675	-1.03301	0.161219	0.430141	0.0429947	0.422949	0.0660955	-0.410689	-0.121351	0.22738	0.175647	0.0817456	-0.0562522	-0.428521
i13.1	NA	NA	NA	NA	NA	NA	NA	NA	NA	NA	NA	NA	NA	NA	NA	NA	NA	NA	NA	NA	NA	NA	NA	NA	NA
i13.20.11 i13.20.12 i13.20.13 i13.20.14 i13.20.15 i13.20.16	-0.891201	0.24321	-0.101643	0.240323	0.50931	0.221253	-0.707252	0.00878567	0.158732	0.318482	-0.474836	0.0451165	-1.25898	0.781859	0.906841	0.272057	0.197524	0.189463	-0.815735	0.156692	0.257796	0.177203	0.0982558	0.0700611	-0.603317
i14.1	-0.964699	0.384225	-0.0179358	0.123875	0.474535	0.107791	-0.587214	0.0299378	0.188269	0.261217	-0.0627083	0.373102	-1.08219	0.330519	0.441283	0.0691106	0.374407	0.0527418	-0.84752	0.351261	0.180222	0.353627	0.0479351	0.239115	-0.820899
i14.2	-0.870507	0.312588	0.0197388	0.150241	0.38794	0.145519	-0.656785	0.0696331	0.182458	0.259175	0.0318742	0.241538	-0.875776	0.221659	0.380705	0.114211	0.297944	0.104349	-0.920251	0.403747	0.180424	0.258926	0.109648	0.247013	-0.796011
i14.3	-0.872992	0.221841	-0.0224263	0.244746	0.428831	0.147298	-0.750687	0.0365672	0.305751	0.261071	-0.0616951	0.151506	-0.899419	0.342889	0.466719	0.116797	0.219749	0.0594804	-0.796001	0.399975	0.151774	0.13916	0.0600443	0.296639	-0.647617
i15.a i15.b i15.c i15.d	-0.953853	0.19406	-0.0339223	0.511156	0.282559	0.041259	-0.76398	0.0235595	0.469236	0.229925	-0.0797485	0.260508	-1.1369	0.376282	0.579863	0.0276654	0.119452	0.00866283	-0.434698	0.278918	0.031376	0.120086	0.027389	0.572244	-0.751095
i15.e	-0.980809	0.457513	-0.00781508	0.24985	0.281261	0.025076	-0.487723	0.031946	0.243739	0.186963	-0.0182615	1.36196	-1.91259	0.333818	0.235071	0.0259632	0.462114	0.0148452	-0.827202	0.32428	0.0269201	0.326488	0.00962858	0.298681	-0.661717
i15.f	-0.975568	-0.0342955	0.081746	0.797836	0.130281	-0.0157385	-1.0209	0.104699	0.811763	0.120175	0.1062	0.296398	-1.33982	0.408027	0.529199	0.0449198	0.0995921	0.0176829	-0.467413	0.305218	0.017487	0.0351496	0.0546756	0.727646	-0.834958
i15.g i15.i	-0.950245	0.126643	0.0214788	0.590094	0.212029	0.0459364	-0.898744	0.0545983	0.650438	0.147771	0.0604014	0.423291	-1.27364	0.125495	0.664451	0.0595161	0.18086	0.00450093	-0.529601	0.284724	0.0475423	0.0913476	0.0529798	0.632988	-0.824858
i15.h	-0.92423	0.152317	-0.0302225	0.411239	0.390897	0.0150418	-0.638014	0.0237091	0.408296	0.190968	-0.0426814	0.339055	-1.19029	0.232806	0.661109	0.0225298	0.226509	0.00903129	-0.499428	0.241359	0.0398332	0.197056	0.0477032	0.448934	-0.733527
i15.j	-0.966453	0.0851366	0.145123	0.377568	0.358625	0.0234781	-0.912809	0.0827189	0.512947	0.293665	0.12595	0.260328	-1.21176	0.174391	0.651093	0.0358646	0.176684	0.0190868	-0.635654	0.404019	0.0351555	0.10439	0.0735414	0.416949	-0.630036
i15.k	-0.998296	-0.0211148	0.10859	0.499481	0.41134	-0.00733925	-0.933589	0.0453449	0.624457	0.271127	0.115589	0.138865	-1.25472	0.360784	0.639484	0.0242685	0.0872894	0.016468	-0.460103	0.332077	0.0298012	0.0565121	0.0435244	0.495164	-0.625002
i16	-0.644418	0.185825	0.00450814	0.315681	0.138404	0.166795	-0.880165	0.00604799	0.211392	0.49593	0.0419317	0.0626725	-1.06179	0.085889	0.871292	0.173961	0.129781	0.00508857	-0.643604	0.334773	0.051447	0.205377	0.0348201	0.225818	-0.517463
i17 i18	-0.956521	0.322925	0.0838982	0.384364	0.165335	0.0675302	-0.822931	0.130401	0.414551	0.210449	0.0903806	0.671747	-1.27219	0.0849455	0.425112	0.0649954	0.335213	0.0133339	-0.70141	0.287868	0.0351551	0.213981	0.0839084	0.361974	-0.695019
i19	-1.05166	0.255031	-0.0265901	0.431458	0.391766	0.0395653	-0.773926	0.0312575	0.406403	0.2967	-0.0523799	0.396897	-1.56289	0.0450991	1.17328	0.0397219	0.241172	0.00210772	-0.631834	0.348833	0.0422093	0.206052	0.0641706	0.408232	-0.720664
i20 i20.w	-1.00012	0.17075	0.234948	0.484882	0.109543	0.0347222	-0.814474	0.0941208	0.500395	0.185236	0.191421	0.377101	-1.17554	0.469171	0.137848	0.0516259	0.261998	0.0613118	-0.713614	0.338678	0.0212188	0.176447	0.0327731	0.616156	-0.846595
i21.1 i21.w.1	-0.883273	0.28249	0.127841	0.142793	0.330149	0.113643	-0.655711	0.00805109	0.142764	0.391253	0.267464	0.0418707	-1.00809	0.274304	0.424451	0.106649	0.265051	0.0979236	-0.755869	0.286246	0.1105	0.325513	0.067902	0.128274	-0.63219
i21.2	-0.865146	-0.0337831	0.12975	0.72275	0.0464291	-0.0123111	-0.8883	-0.0041507	0.763589	0.141172	0.258704	-0.0227101	-1.04099	0.307871	0.497127	0.0432999	0.125534	0.00925062	-0.322786	0.144702	0.0122894	0.10254	0.0659952	0.639318	-0.820142
i22	-0.985566	0.326562	0.000708275	0.205317	0.452979	0.0664452	-0.687383	0.00759507	0.337158	0.276184	0.00383789	0.202267	-0.817333	0.332357	0.278871	0.0458669	0.370179	0.0137022	-0.808351	0.378604	0.0947461	0.283912	0.0107646	0.354481	-0.743904
i23.1	-0.515504	0.116525	-0.272739	0.375028	0.29669	0.122517	-0.984355	0.264665	0.170928	0.426245	-0.0650357	0.060024	-0.751461	0.170898	0.585574	0.159958	0.069339	0.305685	-0.951605	0.416623	0.0592582	0.0809709	0.490482	0.195096	-0.825807
i23.2	-0.520788	0.0819787	0.478874	0.0331401	-0.073205	0.0674736	-0.728943	0.524658	0.0375324	0.0992791	0.0321818	0.0428384	-0.41359	0.0630775	0.275492	0.0211419	0.0290914	0.598792	-1.02134	0.372318	-0.0149445	0.0246245	0.836876	0.119142	-0.965698
i23.3	-0.730328	0.17631	0.489008	0.225354	-0.160343	0.271766	-0.690919	0.0887957	0.12752	0.202837	0.440242	0.0518621	-1.37155	0.17225	0.707197	0.214227	0.078645	0.181884	-0.769994	0.295238	-0.067388	0.0553046	0.330139	0.130525	-0.448581
i24.1 i24.1.w	-0.893951	0.342303	0.102349	0.178748	0.270551	0.119208	-0.698055	0.156744	0.217412	0.20469	0.175186	0.770392	-1.11582	-0.124011	0.294258	0.108646	0.379456	-0.0440369	-0.741104	0.297038	0.131596	0.285887	0.0836189	0.237701	-0.738802
i24.2 i24.3	-0.874364	0.317547	0.0524857	0.19272	0.311611	0.107015	-0.804318	0.244392	0.189959	0.262952	0.0432517	0.597605	-2.04177	0.593728	0.807182	0.0641267	0.187558	0.239738	-1.07508	0.583655	0.046471	0.116362	0.146076	0.261585	-0.570494
i24.4	-0.962779	0.0264415	0.292103	0.235893	0.408341	0.0112257	-0.965548	0.196065	0.390127	0.36813	0.124089	0.196188	-1.14477	0.176308	0.648181	0.0297311	0.115818	0.0523084	-0.663165	0.465307	0.0388101	0.0824132	0.145017	0.350884	-0.617125
i25	-0.870368	0.213419	0.0386149	0.487242	0.131093	0.0501864	-0.758662	0.0164752	0.522628	0.169372	0.100878	0.183028	-1.21206	0.45933	0.468826	0.0517184	0.235907	0.0186631	-0.483413	0.177124	0.0408597	0.224494	0.0559354	0.520108	-0.841398
i26.a i26.w.1	-0.966258	0.140975	0.140699	0.402947	0.281638	0.052256	-0.815199	0.0694414	0.4552	0.238302	0.247513	0.329558	-1.54448	0.0276052	0.939807	0.0839064	0.255715	0.00326761	-0.682851	0.339962	0.069719	0.159145	0.132249	0.404151	-0.765263
i26.b	-0.977134	0.179996	0.28424	0.329576	0.183322	0.0479115	-0.756817	0.189337	0.333412	0.186155	0.267064	0.668328	-1.74867	0.0727445	0.740534	0.0827959	0.314671	0.0194501	-0.75563	0.338713	0.046418	0.17708	0.199566	0.341389	-0.764453
i26.c	-0.989447	0.199431	0.252745	0.334288	0.202983	0.0592555	-0.741011	0.111823	0.330973	0.238959	0.333996	0.49734	-1.72851	0.143806	0.753367	0.0766375	0.255375	0.0249482	-0.685365	0.328405	0.0507959	0.20126	0.142665	0.358474	-0.753196
i26.d i26.d.w	-0.957348	0.207256	0.101378	0.386481	0.262233	0.0626538	-0.752438	0.0529658	0.366772	0.270046	0.132558	0.229097	-1.2399	0.292835	0.585408	0.0773559	0.242841	0.0448256	-0.638635	0.273612	0.0629508	0.214443	0.107475	0.328158	-0.713027
i26.e	-0.961083	0.233008	0.151951	0.268237	0.307887	0.0598213	-0.730845	0.0559874	0.358061	0.256974	0.153152	0.219797	-1.11681	0.136437	0.607424	0.0560717	0.291539	0.028297	-0.671107	0.295199	0.0668745	0.217407	0.130901	0.306732	-0.721915
i27.a i27.a.w	-0.994303	0.333943	0.0608511	0.488934	0.110575	0.135955	-0.978729	0.13652	0.582003	0.124251	0.055826	0.307639	-1.06623	0.40161	0.301154	0.0735743	0.215119	0.0658738	-0.578521	0.223954	0.0367802	0.101515	0.109188	0.495038	-0.742521
i27.41 i27.41.w	-1.085	0.264051	-0.0057933	0.420011	0.406732	0.106574	-1.03253	-0.00651955	0.584219	0.348256	-0.00577634	-0.0161058	-0.986697	0.264359	0.74422	0.022511	0.0775798	0.0142102	-0.418178	0.303877	0.044415	0.0942234	0.0815074	0.619135	-0.83928
i27.42 i27.42.w	-0.941148	0.245772	0.0320058	0.462056	0.201315	0.0922581	-0.954466	0.0590301	0.604765	0.198413	0.0235865	0.115887	-1.13129	0.287888	0.703928	0.0459129	0.160086	0.0388176	-0.602264	0.357448	0.0299696	0.0786869	0.1422	0.535523	-0.78638
i27.43 i27.43.w	-0.908927	0.407096	-0.228743	0.586985	0.143589	0.138065	-0.822088	-0.0393275	0.673774	0.0495761	-0.453903	-0.230105	-0.713579	0.53771	0.859877	0.060526	0.204854	0.0279414	-0.514008	0.220687	0.0429171	0.0436912	0.129518	0.639688	-0.855814
i27.44 i27.44.w	-1.17647	0.36533	-0.0542398	0.736191	0.129191	0.0820342	-0.885887	-0.0470371	0.825287	0.0256027	-0.0638467	-0.246576	-1.13718	0.699759	0.747845	0.0373041	0.186235	0.0301227	-0.435868	0.182207	0.0250624	0.022119	0.123248	0.69757	-0.868
i27.45 i27.45.w	-0.924317	0.519784	-0.167592	0.520424	0.0517018	0.129734	-0.922598	-0.0316293	0.668823	0.155669	-0.0793619	-0.0600089	-0.787449	0.478071	0.448748	0.0177402	0.0913444	0.0344141	-0.517762	0.374263	0.00269813	0.0325484	0.049454	0.57297	-0.65767
i27.5	-0.898394	0.348	-0.26802	0.435899	0.382515	0.0508168	-0.922984	0.139373	0.649033	0.0837606	-0.150776	0.536926	-1.44763	0.374991	0.686485	0.020775	0.211833	0.0317695	-0.494813	0.230435	0.0438416	0.0657429	0.139863	0.554156	-0.803604
i28	-0.995916	0.248443	0.035911	0.480661	0.230901	0.0419323	-0.751707	0.00757357	0.554733	0.147468	0.114703	0.143327	-0.94505	0.385902	0.301117	0.0532249	0.363947	0.0133784	-0.627982	0.197431	0.0618106	0.233891	0.0252361	0.477284	-0.798221
i29	-0.913023	0.325108	-0.0805261	0.472284	0.196157	0.0586571	-0.755217	8.80206e-06	0.537017	0.159534	-0.305043	0.000184806	-0.640214	-0.0182716	0.963344	0.0487853	0.307456	-0.000498241	-0.615305	0.259562	0.042569	0.191889	0.0551882	0.54531	-0.834956
i30 i32 i33	-0.906876	0.31867	-0.0388977	0.359921	0.267183	0.0687237	-0.738003	-0.00387447	0.403418	0.269735	-0.235105	-0.108589	-0.936106	0.01355	1.26625	0.0535816	0.278483	0.00033374	-0.658319	0.32592	0.0549648	0.257305	0.043098	0.45038	-0.805747
i31	-0.892288	0.243835	-0.0573622	0.516973	0.188842	0.0510608	-0.81665	0.0191032	0.579661	0.166826	-0.173288	0.275586	-0.920418	0.398078	0.420042	0.0586996	0.314304	0.0149621	-0.629712	0.241746	0.046908	0.197888	0.034538	0.528859	-0.808192
i34 i35	-0.911962	0.181705	-0.0567946	0.626639	0.160413	0.0420759	-0.837251	0.0110627	0.660793	0.123319	-0.198544	0.16701	-1.01014	0.411992	0.62968	0.0499642	0.227531	0.0093968	-0.504916	0.218025	0.0376383	0.124955	0.042263	0.641586	-0.846442
i36	-0.947265	0.254536	0.151889	0.297034	0.243806	0.0432486	-0.748673	0.170402	0.391511	0.143511	0.114608	0.756728	-1.55154	0.0153474	0.664856	0.0408033	0.316527	0.00279406	-0.669437	0.309313	0.0517258	0.179195	0.186941	0.477719	-0.895581
i37 i37.w.1	-0.919032	0.225132	0.0626962	0.319586	0.311617	0.0674061	-0.91858	0.13465	0.599348	0.117176	0.0587504	0.42142	-3.74667	-0.107899	3.3744	0.0382956	0.239872	-0.0137978	-0.888444	0.624074	0.0234602	0.0294637	0.271104	0.392089	-0.716117
i40.11.a i40.11.b i40.11.f	-0.671824	0.192608	0.128744	0.0938128	0.256659	0.136641	-0.812165	0.298453	0.0881453	0.288926	0.0504774	0.164946	-0.620317	0.110617	0.294276	0.0956399	0.126669	0.287627	-0.799807	0.289871	0.118283	0.187694	0.345901	0.131037	-0.782915
i40.11.c	-0.503417	0.230394	0.0329281	0.0671728	0.172923	0.437647	-0.8397	0.12337	0.0940917	0.184592	0.309079	0.609616	-0.91783	0.111242	-0.112107	0.352328	0.259807	0.0621614	-0.643862	-0.0304343	0.416234	0.233908	-0.0287485	-0.0139667	-0.607426
i40.11.d	-0.501228	0.126396	0.0313493	0.0789766	0.264506	0.46994	-0.928895	0.124476	0.0246729	0.309806	0.24305	0.259564	-0.764757	0.15508	0.107063	0.444766	0.037372	0.112648	-0.724093	0.129308	0.462217	0.14561	0.0241314	0.0401236	-0.672083
i40.11.e i40.11.h	-0.400533	0.0901798	0.040679	0.0916574	0.178017	0.542297	-1.02754	0.0876209	0.0890834	0.308539	0.307999	0.110321	-1.15983	-0.193879	0.935391	0.52995	0.0856518	-0.148053	-1.10991	0.642357	0.226891	0.0653941	0.15746	0.141601	-0.591346
i40.11.g i40.11.i i40.11.j i40.11.k i40.11.l	-0.827513	0.100358	0.42231	0.10004	0.204806	0.122036	-0.90553	0.495735	0.0533419	0.234417	0.14259	0.137647	-0.593269	0.0768969	0.236135	0.141616	0.0620971	0.322398	-0.545751	0.0196394	0.127108	0.119641	0.434044	0.00861028	-0.689404
i40.12	-0.647564	0.116771	0.290886	0.0507118	0.189195	0.288958	-0.830199	0.400254	0.00787229	0.133115	0.297812	0.165597	-0.746348	0.0964859	0.186453	0.170048	0.0106675	0.316016	-0.694955	0.198223	0.308993	0.0878543	0.297433	0.0965448	-0.790825
i40.13	-0.633651	0.127198	0.283889	0.0461378	0.176427	0.314042	-0.839879	0.377599	0.0355765	0.112662	0.319477	0.172113	-0.749906	0.107262	0.151054	0.171971	0.0537096	0.355266	-0.621859	0.0409131	0.351392	0.0908857	0.267342	0.0218621	-0.731482
i40.2	-0.743811	0.139266	0.204615	0.130444	0.269487	0.0575662	-0.812901	0.25195	0.196322	0.307063	0.0625731	0.186398	-0.78607	0.184466	0.352633	0.0893033	0.325153	0.412961	-1.0151	0.187685	0.0600051	0.165407	0.256758	0.0610432	-0.543213
i40.3	-0.706813	0.0828124	0.0566047	0.103416	0.46398	0.0618331	-0.650847	0.279756	0.1007	0.208557	0.0141682	0.0937815	-0.600894	0.133212	0.359733	0.0559239	0.072931	0.287799	-0.803198	0.386544	0.121775	0.0733089	0.377202	0.187606	-0.759892
i41	-0.750597	0.297735	0.0483	0.115211	0.28935	0.353758	-0.877084	0.0571512	0.20275	0.263425	0.30102	0.299776	-1.19506	0.486219	0.108049	0.203335	0.301164	0.13769	-0.823666	0.181478	0.343942	0.263537	0.0206079	0.122227	-0.750314
i45	-0.941249	0.223712	0.1129	0.520233	0.0844036	0.0412638	-0.704219	0.0203414	0.448505	0.194109	0.293805	0.286992	-1.41711	0.408707	0.427605	0.0602843	0.28177	0.0181992	-0.586224	0.22597	0.0211299	0.263452	0.041135	0.488182	-0.813899
i45.w	-0.911808	0.472153	-0.0290286	0.280129	0.188554	0.0470157	-0.472089	0.00466417	0.215847	0.204562	-0.107176	0.172936	-0.977781	0.36307	0.548951	0.152162	1.17743	0.0534155	-1.71169	0.328687	0.0515562	0.561705	0.0406543	0.165455	-0.81937
i50.a i50.b	-0.847182	0.536508	-0.00741231	0.113351	0.204735	0.0886646	-0.419031	0.010855	0.0798719	0.239639	-0.037489	0.332206	-0.734788	0.111985	0.328086	0.133829	0.570615	0.0261418	-1.01279	0.282201	0.0925671	0.655612	0.0293293	0.108068	-0.885576
i51	-0.874742	0.638438	0.0508611	-0.0289705	0.214413	0.0942133	-0.345868	0.0196524	0.011918	0.220084	0.359759	0.941993	-1.62271	0.174646	0.146314	-0.136645	0.380933	0.116458	-0.684301	0.323555	0.0913409	0.635346	0.008812	0.0292229	-0.764721
i52	-0.869195	0.734722	0.0249409	-0.00654153	0.116074	0.126461	-0.244662	0.0136933	0.0177431	0.0867642	0.303326	0.967542	-1.28541	0.0481394	-0.0335967	-0.0476892	0.75151	0.0288565	-0.642083	-0.0905947	0.176353	0.765867	-0.00419708	-0.0188804	-0.919143
i55	-0.852997	0.43678	-0.0290873	0.234187	0.211117	0.0779793	-0.514125	0.00947536	0.192554	0.234117	-0.112104	0.204549	-0.791691	0.04093	0.658317	0.0939817	0.432828	0.0042619	-0.708741	0.17767	0.0896462	0.556831	0.0725311	0.187993	-0.907002
i60.1	-0.734641	0.125218	0.169811	0.0428252	0.396787	0.198737	-0.816487	0.0575245	0.0280404	0.532186	0.803998	0.171604	-1.48133	-0.101074	0.606802	0.377541	0.155753	-0.188199	-0.0497063	-0.295389	0.310651	0.262521	0.10034	-0.0262328	-0.647279
i60.2	-1.12017	0.330695	0.433425	0.0510517	0.304997	0.0663963	-0.549449	0.0974738	0.0340964	0.351482	0.34421	0.38555	-1.10402	-0.0300209	0.404284	0.210905	0.701565	-0.156167	-0.886608	0.130306	0.0813685	0.467033	0.135812	0.00841491	-0.692629
i60.3	-0.868096	0.229969	0.122777	-0.0335337	0.548884	0.187636	-0.81708	0.101208	0.00163367	0.526602	0.32142	0.324728	-1.2168	0.124032	0.44662	-0.0784189	0.00468224	0.110795	-0.691941	0.654883	0.180039	0.2117	0.0559591	0.0918569	-0.539555
i61.1	-0.937411	0.289425	0.0635574	-0.0164384	0.600867	0.22081	-0.929779	-0.00182926	0.0294572	0.681341	0.384483	-0.0145045	-0.96614	-0.232018	0.82818	-0.0703702	0.165286	-0.164187	-0.783002	0.852274	0.161307	0.239749	0.0367528	0.0534474	-0.491256
i61.2	-0.885355	0.225013	0.0557065	0.0101296	0.594506	0.297555	-0.962072	-0.0624125	-0.00778581	0.734715	0.193632	-0.164053	-0.987396	-0.148277	1.10609	0.0220828	-0.0128353	-0.0929954	-1.08994	1.17369	0.18119	0.169331	0.0969835	0.164085	-0.61159
i62	-1.01173	0.183022	0.288847	-0.0296878	0.569554	0.0893892	-0.826656	0.127336	0.0539285	0.556002	0.325497	0.293799	-1.29976	0.0974059	0.583062	-0.0781175	0.290542	0.227445	-0.595083	0.155214	0.120439	0.240728	0.109412	0.0124736	-0.483053
i63	-0.863938	0.2784	0.0700581	0.0545015	0.460978	0.100091	-0.680878	0.014003	0.00998053	0.556803	0.407212	0.22639	-1.1763	-0.1845	0.7272	0.258602	0.131719	-0.150611	-0.882963	0.643253	0.12256	0.41176	0.033263	0.0360436	-0.603626
i64	-0.806485	0.460652	0.000848318	-0.0241941	0.369179	0.275916	-0.646701	0.00607518	0.0339606	0.330749	0.020217	0.24172	-0.665954	-0.200043	0.60406	-0.137522	0.322281	-0.0477122	-0.903592	0.766546	0.207176	0.309883	0.0142241	0.0756795	-0.606963
i65	-0.900831	0.357195	0.0254546	0.0801498	0.438031	0.0937067	-0.626092	0.00591799	0.0232456	0.503221	0.313209	0.277574	-1.09693	-0.0156331	0.521784	0.236024	0.260933	-0.00374135	-1.1251	0.631881	0.0871438	0.381615	0.00843633	0.0426888	-0.519884
i66	-0.930354	0.223374	-0.00655015	-0.0187334	0.732264	0.0519141	-0.711266	0.0045195	0.0274053	0.627427	-0.0357116	0.106022	-0.82861	0.624988	0.133312	-0.028133	0.177085	0.172153	-0.833066	0.511962	0.0683281	0.251908	0.00228161	0.0318104	-0.354328
i67	-0.945304	0.390773	0.00852409	-0.0272036	0.57321	0.0853297	-0.657373	0.00658375	0.0224086	0.543051	0.0754253	0.266788	-1.19339	0.0940179	0.757157	-0.0566747	0.213797	0.0221363	-0.835053	0.655794	0.0751484	0.32604	0.0112182	0.0412678	-0.453674
i70	-0.499978	0.0704702	0.0207958	0.134936	0.273775	0.461788	-0.890689	0.00513856	0.0933501	0.330413	0.688329	0.0259552	-1.51019	0.205531	0.590371	0.421008	0.0444468	0.0193741	-0.785475	0.300646	0.461968	0.085082	0.030097	0.162597	-0.739744
i71	-0.642752	0.152718	0.0457723	0.0627694	0.381492	0.340621	-0.887225	0.0645032	0.032645	0.449456	0.660662	0.417425	-1.61815	-0.449632	0.989698	0.375564	0.0875734	-0.186387	-0.75786	0.48111	0.319436	0.168735	0.0574149	0.0673297	-0.612916
i72 i73 i74	-0.928012	0.388269	0.0273219	0.0819371	0.430484	0.0491224	-0.602877	0.00992013	0.0890201	0.454814	0.138692	0.398024	-1.25898	-0.468166	1.19043	0.0648757	0.557112	-0.0730236	-1.20123	0.652269	0.0512691	0.42814	0.0279295	0.0981124	-0.605451
i75	-0.895491	0.411319	0.0275784	0.087683	0.36891	0.119018	-0.551785	0.0248807	0.108736	0.299151	0.160532	0.500521	-1.07968	0.15469	0.263936	0.106123	0.454813	0.0321637	-0.953817	0.360717	0.169818	0.475904	0.0208722	0.137194	-0.803788
i80	-0.874794	0.680182	0.0468617	-0.0185422	0.166292	0.078106	-0.362897	0.0236439	0.0661118	0.195035	0.150843	0.662777	-1.31281	-0.0663264	0.565516	-0.0207173	0.643269	-0.0230225	-0.810286	0.210756	0.0646414	0.660226	0.0682932	0.0733241	-0.866485
i85	-0.968278	0.548573	0.0241094	0.0517505	0.343845	0.0543811	-0.461412	0.020415	0.152011	0.234605	0.0551875	0.471402	-1.10591	-0.115135	0.694456	0.0180406	0.534563	-0.0175344	-0.972144	0.437075	0.0702812	0.483727	0.0620107	0.256269	-0.872288
i90.1.a i90.1.b i90.1.c i90.1.d i90.1.e i90.1.f i90.1.g	-0.876092	0.300371	0.00677541	0.147594	0.421351	0.176065	-0.729305	-0.0203793	0.070127	0.503492	0.0280376	-0.143873	-0.906636	-0.10202	1.12449	0.186627	0.151278	-0.0311734	-0.890794	0.584062	0.107648	0.219452	0.0694246	0.118009	-0.514534
i90.3.a i90.3.b i90.3.c	-0.960605	0.26309	0.0483821	0.108205	0.540927	0.155223	-0.684204	-0.0462644	0.117051	0.458195	0.42045	-0.681436	-0.593417	-0.402611	1.25701	0.135457	0.248356	-0.0579973	-0.889211	0.563395	0.137242	0.197037	0.0366994	0.114185	-0.485163
i90.4.a i90.4.b	-0.861358	0.260722	0.0941012	0.0786959	0.427838	0.133159	-0.730225	0.0132532	0.111133	0.472679	0.167662	0.0462348	-1.10909	0.0849433	0.810248	0.0963852	0.266507	0.0583911	-0.949326	0.528042	0.0945838	0.204602	0.100534	0.095312	-0.495032
i90.5.a i90.5.b	-0.908262	0.295879	0.0642811	0.150469	0.397632	0.169707	-0.733997	0.000710212	0.124025	0.439556	0.156976	0.00302379	-0.978626	0.0166766	0.80195	0.184379	0.264964	0.00836802	-0.945697	0.487986	0.101515	0.195649	0.0838393	0.10167	-0.482674
i90.6.a i90.6.b i90.6.c i90.6.d i90.6.e i90.6.f	-0.903675	0.27548	0.00314916	0.123298	0.501748	0.157	-0.758454	-0.0060344	0.109687	0.497802	0.0175079	-0.0588661	-0.852428	0.169353	0.724433	0.150409	0.234781	0.0371595	-0.975039	0.552689	0.119259	0.207612	0.0309716	0.107689	-0.465532
i91 i92	-0.961461	0.243549	0.0626027	0.112569	0.54274	0.0632654	-0.726801	0.0324778	0.116749	0.514309	0.166199	0.331926	-1.09653	0.295767	0.302641	0.0853697	0.340845	0.0844885	-0.980337	0.469634	0.086025	0.313818	0.0180686	0.0981543	-0.516065
i93 i95	-0.888947	0.51738	-0.0402168	0.104004	0.307781	0.0671859	-0.522426	0.0160389	0.10585	0.333351	-0.0946865	0.290796	-0.643426	-0.444128	0.891444	0.0685087	0.53693	-0.124258	-0.846469	0.365288	0.0642232	0.535654	0.0790068	0.115715	-0.7946

## Sheet: Elast_4D
Industry	e_KK	e_KL	e_KE	e_KM	e_KS	e_LK	e_LL	e_LE	e_LM	e_LS	e_EK	e_EL	e_EE	e_EM	e_ES	e_MK	e_ML	e_ME	e_MM	e_MS	e_SK	e_SL	e_SE	e_SM	e_SS
i01.a	NA	NA	NA	NA	NA	NA	NA	NA	NA	NA	NA	NA	NA	NA	NA	NA	NA	NA	NA	NA	NA	NA	NA	NA	NA
i01.b	-0.746282	0.133642	0.108868	0.209916	0.293856	0.191454	-0.801105	0.0962743	0.195103	0.318274	0.188634	0.116441	-1.09322	0.297796	0.490349	0.140771	0.0913289	0.115257	-0.702762	0.355405	0.160081	0.121027	0.154167	0.288708	-0.723983
i01.c	-0.731458	0.211607	0.0966291	0.162402	0.260819	0.248056	-0.749461	0.0820388	0.153247	0.266119	0.214778	0.155555	-1.07179	0.260828	0.440633	0.150931	0.121495	0.109058	-0.761737	0.380253	0.176066	0.153247	0.133823	0.276199	-0.739335
i01.d	-0.734053	0.192899	0.101863	0.150072	0.289219	0.247948	-0.75472	0.0595952	0.048849	0.398328	0.340715	0.15508	-1.0902	0.43942	0.154989	0.130522	0.0330529	0.114258	-0.64944	0.371607	0.23674	0.253662	0.0379289	0.34974	-0.878071
i01.e	-0.84642	0.186206	0.133673	0.190271	0.33627	0.157561	-0.683133	0.0855318	0.155757	0.284283	0.284782	0.215347	-1.21632	0.28444	0.431751	0.173656	0.167999	0.121854	-0.762501	0.298992	0.173116	0.172959	0.104331	0.168652	-0.619059
i01.f	-0.884613	0.104219	0.124313	0.318858	0.337223	0.129955	-0.846338	0.0968654	0.289612	0.329906	0.449067	0.280621	-1.36466	0.271361	0.363608	0.278652	0.202973	0.0656473	-0.897619	0.350347	0.224521	0.176151	0.0670156	0.266914	-0.734601
i01.g	-0.862215	-0.0268284	0.0209519	0.166956	0.701136	-0.133631	-1.97113	0.438004	-0.135973	1.80273	0.118543	0.49753	-1.2598	-0.280487	0.924213	0.437221	-0.071489	-0.129825	-0.905882	0.669975	0.212656	0.109773	0.0495445	0.0775955	-0.449569
i01.h	-0.831762	0.167771	0.176746	0.117529	0.369717	0.174668	-0.764893	0.179711	0.116822	0.293692	0.238538	0.232962	-1.14268	0.277892	0.393283	0.0932063	0.0889878	0.163294	-0.776671	0.431183	0.112734	0.0860166	0.0888556	0.165785	-0.453392
i01.i	-0.980177	0.0811575	0.122328	0.437434	0.339257	0.089255	-0.840559	-0.0308902	0.545404	0.23679	0.254642	-0.0584683	-1.23995	0.63367	0.410104	0.0765602	0.0867971	0.0532783	-0.497097	0.280461	0.125442	0.0796109	0.0728455	0.592508	-0.870406
i01.j	-0.829826	0.0845535	0.0868792	0.392505	0.265889	0.145228	-0.837613	-0.000876712	0.481477	0.211785	0.380786	-0.00223719	-1.27254	0.533932	0.360055	0.169277	0.120896	0.0525381	-0.646506	0.303796	0.202749	0.0940229	0.0626414	0.537138	-0.896551
i01.k	-0.835627	0.121418	0.114619	0.385286	0.214304	0.14292	-0.750857	0.0233032	0.412869	0.171765	0.327563	0.0565777	-1.19699	0.47243	0.340415	0.162918	0.148316	0.069901	-0.605824	0.224688	0.18029	0.122762	0.100209	0.447029	-0.85029
i01.l	-0.649502	0.102687	0.0503226	0.160408	0.336084	0.297696	-0.832488	0.0648269	0.176243	0.293722	0.809151	0.359552	-1.91672	0.464875	0.283136	0.289881	0.109861	0.0522472	-0.913387	0.461398	0.349595	0.105389	0.0183167	0.265583	-0.738884
i01.m	-0.650218	0.0726881	0.0526169	0.170582	0.354331	0.23781	-0.927225	0.025471	0.28244	0.381503	0.730278	0.108054	-2.24218	0.364854	1.03899	0.363697	0.184062	0.0560482	-0.989619	0.385812	0.240053	0.0790003	0.0507162	0.122593	-0.492363
i01.n	-0.827262	0.10571	0.0655377	0.412932	0.243082	0.16008	-0.811799	-0.00679395	0.472504	0.186008	0.336764	-0.0230534	-1.26986	0.590017	0.366135	0.183957	0.139002	0.0511525	-0.555012	0.180901	0.213523	0.107895	0.0625888	0.356693	-0.740699
i01.o	-0.973763	0.00556404	0.255622	0.280355	0.432221	0.00592348	-0.819209	0.201426	0.200613	0.411247	0.102829	0.0761106	-1.60852	0.819342	0.61024	0.0465548	0.0312916	0.338223	-0.463855	0.0477861	0.0343728	0.0307202	0.12064	0.0228852	-0.208618
i02	-1.26657	0.329199	0.226648	0.529158	0.181561	0.138488	-0.709277	0.0536487	0.266998	0.250143	0.493237	0.277529	-1.25791	0.280715	0.206429	0.195519	0.234508	0.0476612	-0.755899	0.278211	0.0830547	0.272004	0.0433919	0.34444	-0.742891
i05	-0.866263	0.255273	0.291873	0.409998	-0.0908808	0.167772	-0.64424	0.131403	0.25101	0.0940549	0.373826	0.256075	-1.44295	0.670649	0.142405	0.210057	0.195673	0.268271	-0.751719	0.0777186	-0.0403266	0.0635018	0.0493366	0.0673116	-0.139823
i10	-0.78893	0.225367	0.0519462	0.257214	0.254403	0.096192	-0.700565	0.170482	0.243464	0.190427	0.0496191	0.381527	-0.828754	0.202345	0.195263	0.132759	0.294411	0.109337	-0.80445	0.267943	0.0787261	0.138063	0.063259	0.160647	-0.440696
i11.a	-0.594407	0.183771	0.116213	-0.036168	0.330591	0.199378	-0.805731	0.00697473	0.155397	0.44398	0.227408	0.0125799	-1.51446	0.583078	0.691395	-0.0639935	0.253428	0.527215	-1.21573	0.499081	0.105352	0.130412	0.112598	0.0898904	-0.438252
i11.b	-0.555204	0.330032	0.0314221	0.00367995	0.19007	0.380474	-0.606291	-0.0478151	0.0702888	0.203343	0.151586	-0.200087	-0.834386	0.326141	0.556746	0.0150179	0.248819	0.275897	-1.18558	0.645842	0.115526	0.107208	0.0701455	0.0961895	-0.389069
i11.c	-0.850208	0.094281	1.3131	-0.0931934	-0.463982	0.0657143	-0.910651	0.363382	0.0817841	0.39977	0.511383	0.203037	-1.8509	-0.0208175	1.15729	-0.175961	0.221546	-0.100928	-2.15102	2.20636	-0.100433	0.124151	0.643238	0.252942	-0.919898
i12	-0.814956	0.0541401	0.00693981	0.0607533	0.693122	0.0267884	-0.710592	0.123163	0.295714	0.264928	0.0119794	0.429675	-1.03301	0.161219	0.430141	0.0429947	0.422949	0.0660955	-0.410689	-0.121351	0.22738	0.175647	0.0817456	-0.0562522	-0.428521
i13.1	NA	NA	NA	NA	NA	NA	NA	NA	NA	NA	NA	NA	NA	NA	NA	NA	NA	NA	NA	NA	NA	NA	NA	NA	NA
i13.20.11	-1.0349	0.0646937	0.0280721	0.418445	0.523688	0.0932045	-0.934799	0.0232564	0.505215	0.313124	0.326307	0.187638	-0.595494	0.394092	-0.312543	0.437285	0.366461	0.03543	-1.00196	0.162779	0.915741	0.38005	-0.0470173	0.272377	-1.52115
i13.20.12	NA	NA	NA	NA	NA	NA	NA	NA	NA	NA	NA	NA	NA	NA	NA	NA	NA	NA	NA	NA	NA	NA	NA	NA	NA
i13.20.13	NA	NA	NA	NA	NA	NA	NA	NA	NA	NA	NA	NA	NA	NA	NA	NA	NA	NA	NA	NA	NA	NA	NA	NA	NA
i13.20.14	-0.873964	0.111165	-0.155536	0.183413	0.734923	0.0992204	-0.918306	0.0625182	0.126203	0.630364	-0.876773	0.394847	-2.19201	1.80357	0.870372	0.152091	0.117249	0.265308	-0.91317	0.378523	0.359978	0.345933	0.0756281	0.22359	-1.00513
i13.20.15	-0.960114	0.0805853	0.0177187	0.279092	0.582718	0.121581	-0.871801	0.226318	0.128114	0.395788	0.0688442	0.582833	0.685201	0.935105	-2.27198	0.341673	0.103956	0.294637	-1.42097	0.680702	0.287782	0.129556	-0.288785	0.2746	-0.403153
i13.20.16	-0.60638	0.212571	-0.240676	0.145702	0.488783	0.495032	-0.883018	0.253549	-0.105349	0.239786	-0.512447	0.231819	-1.42934	1.16291	0.547061	0.193813	-0.0601755	0.726519	-0.185425	-0.674732	0.110043	0.0231815	0.057845	-0.114198	-0.0768714
i14.1	-0.964699	0.384225	-0.0179358	0.123875	0.474535	0.107791	-0.587214	0.0299378	0.188269	0.261217	-0.0627083	0.373102	-1.08219	0.330519	0.441283	0.0691106	0.374407	0.0527418	-0.84752	0.351261	0.180222	0.353627	0.0479351	0.239115	-0.820899
i14.2	-0.870507	0.312588	0.0197388	0.150241	0.38794	0.145519	-0.656785	0.0696331	0.182458	0.259175	0.0318742	0.241538	-0.875776	0.221659	0.380705	0.114211	0.297944	0.104349	-0.920251	0.403747	0.180424	0.258926	0.109648	0.247013	-0.796011
i14.3	-0.872992	0.221841	-0.0224263	0.244746	0.428831	0.147298	-0.750687	0.0365672	0.305751	0.261071	-0.0616951	0.151506	-0.899419	0.342889	0.466719	0.116797	0.219749	0.0594804	-0.796001	0.399975	0.151774	0.13916	0.0600443	0.296639	-0.647617
i15.a	-0.97091	0.114537	-0.0393743	0.56914	0.326607	0.0317643	-0.876716	0.0167024	0.525376	0.302874	-0.0989838	0.151403	-0.927916	0.585121	0.290376	0.029398	0.0978525	0.0120224	-0.429619	0.290346	0.0360622	0.120585	0.0127537	0.620647	-0.790047
i15.b	-0.96248	0.194017	-0.0518584	0.545449	0.274872	0.033777	-0.76681	0.0515071	0.528607	0.152919	-0.119305	0.680651	-1.3796	0.309794	0.508457	0.0233358	0.129903	0.00576106	-0.44228	0.28328	0.0252178	0.0805854	0.0202765	0.607471	-0.73355
i15.c	-0.935454	0.30984	-0.0359591	0.430368	0.231205	0.0518053	-0.717492	0.00810736	0.44726	0.210319	-0.220898	0.297869	-1.24139	0.337749	0.826669	0.046251	0.287478	0.00590869	-0.608683	0.269046	0.0430383	0.234152	0.0250499	0.466018	-0.768259
i15.d	-0.842025	0.229213	-0.094097	0.575568	0.131341	0.0625463	-0.797467	0.0198728	0.358253	0.356795	-0.46972	0.363547	-1.31697	-0.103258	1.5264	0.115002	0.262324	-0.00413305	-0.662566	0.289373	0.0252275	0.251147	0.0587325	0.278177	-0.613284
i15.e	-0.980809	0.457513	-0.00781508	0.24985	0.281261	0.025076	-0.487723	0.031946	0.243739	0.186963	-0.0182615	1.36196	-1.91259	0.333818	0.235071	0.0259632	0.462114	0.0148452	-0.827202	0.32428	0.0269201	0.326488	0.00962858	0.298681	-0.661717
i15.f	-0.975568	-0.0342955	0.081746	0.797836	0.130281	-0.0157385	-1.0209	0.104699	0.811763	0.120175	0.1062	0.296398	-1.33982	0.408027	0.529199	0.0449198	0.0995921	0.0176829	-0.467413	0.305218	0.017487	0.0351496	0.0546756	0.727646	-0.834958
i15.g	-0.935408	0.539037	-0.00419938	0.160184	0.240387	0.0360686	-0.530584	-0.000659196	0.215886	0.279289	-0.00582709	-0.01367	-1.39721	-0.0940797	1.51078	0.0273441	0.550752	-0.0115737	-0.89463	0.328108	0.0170109	0.295366	0.0770465	0.136016	-0.52544
i15.h	-0.92423	0.152317	-0.0302225	0.411239	0.390897	0.0150418	-0.638014	0.0237091	0.408296	0.190968	-0.0426814	0.339055	-1.19029	0.232806	0.661109	0.0225298	0.226509	0.00903129	-0.499428	0.241359	0.0398332	0.197056	0.0477032	0.448934	-0.733527
i15.i	-0.953591	0.130163	0.0190014	0.590596	0.21383	0.0477981	-0.904376	0.0580115	0.645395	0.153171	0.0533195	0.443293	-1.2909	0.135744	0.658542	0.059995	0.178537	0.0049141	-0.530125	0.286679	0.0482404	0.0941012	0.052945	0.636668	-0.831955
i15.j	-0.966453	0.0851366	0.145123	0.377568	0.358625	0.0234781	-0.912809	0.0827189	0.512947	0.293665	0.12595	0.260328	-1.21176	0.174391	0.651093	0.0358646	0.176684	0.0190868	-0.635654	0.404019	0.0351555	0.10439	0.0735414	0.416949	-0.630036
i15.k	-0.998296	-0.0211148	0.10859	0.499481	0.41134	-0.00733925	-0.933589	0.0453449	0.624457	0.271127	0.115589	0.138865	-1.25472	0.360784	0.639484	0.0242685	0.0872894	0.016468	-0.460103	0.332077	0.0298012	0.0565121	0.0435244	0.495164	-0.625002
i16	-0.644418	0.185825	0.00450814	0.315681	0.138404	0.166795	-0.880165	0.00604799	0.211392	0.49593	0.0419317	0.0626725	-1.06179	0.085889	0.871292	0.173961	0.129781	0.00508857	-0.643604	0.334773	0.051447	0.205377	0.0348201	0.225818	-0.517463
i17	-0.990019	0.224709	0.267765	0.215802	0.281743	0.0566599	-0.74588	0.0880411	0.38612	0.215059	0.313697	0.40906	-1.54595	0.807843	0.0153483	0.0406484	0.288439	0.129884	-0.780419	0.321447	0.0676226	0.204711	0.00314443	0.409601	-0.685078
i18	-1.04368	0.282207	0.238409	0.239734	0.28333	0.0538541	-0.725569	0.0650108	0.363657	0.243047	0.220614	0.315243	-0.794554	0.197361	0.0613365	0.0365538	0.290566	0.0325203	-0.587175	0.227535	0.0447985	0.201378	0.0104804	0.235948	-0.492604
i19	-1.05166	0.255031	-0.0265901	0.431458	0.391766	0.0395653	-0.773926	0.0312575	0.406403	0.2967	-0.0523799	0.396897	-1.56289	0.0450991	1.17328	0.0397219	0.241172	0.00210772	-0.631834	0.348833	0.0422093	0.206052	0.0641706	0.408232	-0.720664
i20	-0.997767	0.16435	0.201102	0.525949	0.106366	0.0336108	-0.833117	0.0812575	0.521865	0.196384	0.162902	0.321859	-1.11463	0.584246	0.0456251	0.0510738	0.247801	0.0700388	-0.681891	0.312977	0.0201488	0.181905	0.0106694	0.610527	-0.82325
i20.w	-1.04003	0.182933	0.309612	0.31705	0.230435	0.0374092	-0.788618	0.109748	0.392514	0.248946	0.217335	0.376724	-1.19869	0.43342	0.171209	0.0462204	0.279816	0.0900122	-0.759065	0.343017	0.0402894	0.212843	0.0426439	0.411389	-0.707165
i21.1	-0.941696	0.212787	0.115491	0.274304	0.339114	0.0851481	-0.718616	0.0385829	0.169888	0.424997	0.14882	0.124245	-0.930616	0.214209	0.443342	0.142884	0.22115	0.0865922	-0.695293	0.244666	0.0951402	0.297972	0.0965264	0.131777	-0.621416
i21.w.1	-0.838611	0.306073	0.10483	0.07778	0.349927	0.126812	-0.630121	0.00975371	0.0754953	0.41806	0.335091	0.0752508	-1.10719	0.205271	0.491578	0.0810163	0.189798	0.0668894	-0.772809	0.435106	0.117271	0.338155	0.0515382	0.139992	-0.646956
i21.2	-0.865146	-0.0337831	0.12975	0.72275	0.0464291	-0.0123111	-0.8883	-0.0041507	0.763589	0.141172	0.258704	-0.0227101	-1.04099	0.307871	0.497127	0.0432999	0.125534	0.00925062	-0.322786	0.144702	0.0122894	0.10254	0.0659952	0.639318	-0.820142
i22	-0.985566	0.326562	0.000708275	0.205317	0.452979	0.0664452	-0.687383	0.00759507	0.337158	0.276184	0.00383789	0.202267	-0.817333	0.332357	0.278871	0.0458669	0.370179	0.0137022	-0.808351	0.378604	0.0947461	0.283912	0.0107646	0.354481	-0.743904
i23.1	-0.515504	0.116525	-0.272739	0.375028	0.29669	0.122517	-0.984355	0.264665	0.170928	0.426245	-0.0650357	0.060024	-0.751461	0.170898	0.585574	0.159958	0.069339	0.305685	-0.951605	0.416623	0.0592582	0.0809709	0.490482	0.195096	-0.825807
i23.2	-0.520788	0.0819787	0.478874	0.0331401	-0.073205	0.0674736	-0.728943	0.524658	0.0375324	0.0992791	0.0321818	0.0428384	-0.41359	0.0630775	0.275492	0.0211419	0.0290914	0.598792	-1.02134	0.372318	-0.0149445	0.0246245	0.836876	0.119142	-0.965698
i23.3	-0.730328	0.17631	0.489008	0.225354	-0.160343	0.271766	-0.690919	0.0887957	0.12752	0.202837	0.440242	0.0518621	-1.37155	0.17225	0.707197	0.214227	0.078645	0.181884	-0.769994	0.295238	-0.067388	0.0553046	0.330139	0.130525	-0.448581
i24.1	-0.91212	0.327448	0.146001	0.135955	0.302716	0.11052	-0.740082	0.217013	0.192035	0.220514	0.13612	0.59945	-0.872562	0.136161	0.000831179	0.085119	0.356215	0.091436	-0.88507	0.3523	0.142597	0.307761	0.000419957	0.265068	-0.715847
i24.1.w	-0.888716	0.35147	0.0177352	0.186586	0.332924	0.132063	-0.684622	0.0334996	0.240355	0.278705	0.11701	0.588212	-0.853051	-0.124507	0.272336	0.102604	0.351758	-0.0103775	-0.742194	0.29821	0.14574	0.324703	0.0180697	0.237396	-0.725909
i24.2	-0.842997	0.323505	-0.0919046	0.157611	0.453785	0.109366	-0.827486	0.20609	0.146158	0.365872	-0.0638199	0.423327	-1.78683	0.329978	1.09734	0.05355	0.14689	0.16145	-0.923231	0.561341	0.0407598	0.0972099	0.14194	0.148401	-0.42831
i24.3	-0.879791	0.296398	0.0761304	0.188971	0.318292	0.0998486	-0.820684	0.253987	0.193006	0.273842	0.064218	0.635981	-2.00174	0.605488	0.696052	0.0640814	0.194286	0.243413	-1.0719	0.570125	0.0522117	0.133345	0.135358	0.275788	-0.596703
i24.4	-0.962779	0.0264415	0.292103	0.235893	0.408341	0.0112257	-0.965548	0.196065	0.390127	0.36813	0.124089	0.196188	-1.14477	0.176308	0.648181	0.0297311	0.115818	0.0523084	-0.663165	0.465307	0.0388101	0.0824132	0.145017	0.350884	-0.617125
i25	-0.870368	0.213419	0.0386149	0.487242	0.131093	0.0501864	-0.758662	0.0164752	0.522628	0.169372	0.100878	0.183028	-1.21206	0.45933	0.468826	0.0517184	0.235907	0.0186631	-0.483413	0.177124	0.0408597	0.224494	0.0559354	0.520108	-0.841398
i26.a	-0.995245	0.123015	0.186784	0.42659	0.258856	0.0458315	-0.839803	0.0982454	0.469046	0.226679	0.285709	0.40336	-1.74009	0.108341	0.942677	0.0727071	0.214574	0.0120718	-0.615487	0.316135	0.0615524	0.144675	0.146542	0.441055	-0.793825
i26.w.1	-0.877057	0.198724	0.0751807	0.228741	0.37441	0.0736698	-0.742744	0.046301	0.29905	0.323723	0.175975	0.292346	-1.19065	0.0933919	0.628939	0.0872669	0.307759	0.0152219	-0.861577	0.451329	0.0965968	0.225294	0.0693233	0.305214	-0.696428
i26.b	-0.977134	0.179996	0.28424	0.329576	0.183322	0.0479115	-0.756817	0.189337	0.333412	0.186155	0.267064	0.668328	-1.74867	0.0727445	0.740534	0.0827959	0.314671	0.0194501	-0.75563	0.338713	0.046418	0.17708	0.199566	0.341389	-0.764453
i26.c	-0.989447	0.199431	0.252745	0.334288	0.202983	0.0592555	-0.741011	0.111823	0.330973	0.238959	0.333996	0.49734	-1.72851	0.143806	0.753367	0.0766375	0.255375	0.0249482	-0.685365	0.328405	0.0507959	0.20126	0.142665	0.358474	-0.753196
i26.d	-0.968724	0.203782	0.116501	0.389489	0.258953	0.0613267	-0.749589	0.048347	0.368455	0.27146	0.142986	0.197174	-1.15748	0.316815	0.5005	0.0772972	0.242979	0.0512282	-0.636298	0.264794	0.0633563	0.220694	0.099772	0.326444	-0.710267
i26.d.w	-0.942156	0.19872	0.0967474	0.346694	0.299995	0.0615047	-0.781147	0.0621434	0.338073	0.319426	0.172808	0.358636	-1.53362	0.203097	0.799078	0.0725323	0.228523	0.0237883	-0.66618	0.341336	0.0599082	0.206099	0.0893381	0.325814	-0.681159
i26.e	-0.961083	0.233008	0.151951	0.268237	0.307887	0.0598213	-0.730845	0.0559874	0.358061	0.256974	0.153152	0.219797	-1.11681	0.136437	0.607424	0.0560717	0.291539	0.028297	-0.671107	0.295199	0.0668745	0.217407	0.130901	0.306732	-0.721915
i27.a	-1.02088	0.277313	0.154668	0.481152	0.107752	0.112754	-1.03338	0.234405	0.570897	0.115325	0.1614	0.601604	-1.54503	0.412363	0.36966	0.0714252	0.208433	0.0586605	-0.562643	0.224124	0.0360021	0.0947693	0.118359	0.504457	-0.753588
i27.a.w	-0.971661	0.238522	0.175382	0.358217	0.199541	0.102713	-0.876906	0.0853885	0.510845	0.177959	0.142887	0.161551	-0.799446	0.425645	0.0693633	0.0636755	0.210871	0.0928678	-0.602746	0.235333	0.0694605	0.143855	0.0296364	0.460852	-0.703803
i27.41	-1.10119	0.267149	-0.0172051	0.428308	0.422942	0.10786	-1.00817	-0.00943421	0.585918	0.323824	-0.0168596	-0.0228975	-0.947489	0.258953	0.728293	0.0236029	0.0799719	0.0145626	-0.43231	0.314172	0.0457129	0.0866878	0.0803291	0.616192	-0.828922
i27.41.w	0.0419636	0.877873	0.0017395	-0.763509	-0.158067	0.584284	-0.58114	0.021519	0.232523	-0.257186	0.00920186	0.171033	-2.79215	2.75432	-0.142404	-0.144599	0.0661645	0.0986087	-0.653819	0.633645	-0.0291476	-0.0712553	-0.00496403	0.61696	-0.511593
i27.42	-1.0415	0.236105	0.117068	0.268	0.42033	0.0883305	-0.959456	0.144199	0.561228	0.165699	0.0540182	0.177851	-0.934421	0.419643	0.282909	0.0278758	0.156037	0.0945961	-0.564039	0.285531	0.0821727	0.0865869	0.119863	0.536657	-0.82528
i27.42.w	-0.873215	0.259605	-0.11213	0.436622	0.289118	0.100105	-0.944476	0.00730332	0.5702	0.266867	-0.32303	0.0545629	-1.24254	-0.127731	1.63874	0.0451419	0.152883	-0.00458408	-0.601417	0.407977	0.0420628	0.100688	0.0827587	0.574096	-0.799605
i27.43	-0.961093	0.424893	-0.220099	0.614183	0.142116	0.146058	-0.837006	-0.0467263	0.682177	0.055497	-0.393626	-0.243098	-0.750443	0.631185	0.755982	0.0586598	0.189536	0.033708	-0.491515	0.20961	0.043273	0.0491583	0.128712	0.668259	-0.889402
i27.43.w	-1.09658	0.890693	-0.580763	0.642616	0.144032	0.276381	-0.744625	-0.11843	0.708637	-0.121962	-1.60974	-1.05788	0.0779431	-0.456599	3.04628	0.0755046	0.268328	-0.0193554	-0.548015	0.223538	0.0407096	-0.111092	0.310637	0.537735	-0.777988
i27.44	-1.19031	0.351333	-0.0490481	0.713686	0.174339	0.081098	-0.891228	-0.0441899	0.835806	0.0185138	-0.0595393	-0.232388	-1.17094	0.712031	0.750834	0.0361955	0.183638	0.0297486	-0.429873	0.180291	0.0349137	0.0160623	0.123869	0.711913	-0.886759
i27.44.w	-1.04434	0.00252965	0.0841169	0.300836	0.656853	0.000668405	-1.22168	0.161019	0.475898	0.58409	0.0347232	0.251556	-1.63593	0.794585	0.555069	0.0117223	0.0701808	0.0750046	-0.529717	0.372809	0.0237122	0.0798003	0.0485417	0.345387	-0.497442
i27.45	-0.908975	0.501054	-0.179197	0.550066	0.0370516	0.121024	-0.904227	-0.019886	0.675695	0.127394	-0.0764153	-0.0351083	-0.724238	0.510501	0.32526	0.0168738	0.0858151	0.0367237	-0.506643	0.367231	0.0018052	0.025697	0.0371621	0.583256	-0.647921
i27.45.w	-7.41792	4.7513	6.24906	-4.22477	0.64233	1.63126	-1.75451	-1.20285	1.25411	0.0719936	8.85064	-4.96203	-11.3217	6.44874	0.984335	-0.3504	0.30296	0.377639	-1.68419	1.35399	0.021338	0.00696591	0.0230876	0.542312	-0.593704
i27.5	-0.898394	0.348	-0.26802	0.435899	0.382515	0.0508168	-0.922984	0.139373	0.649033	0.0837606	-0.150776	0.536926	-1.44763	0.374991	0.686485	0.020775	0.211833	0.0317695	-0.494813	0.230435	0.0438416	0.0657429	0.139863	0.554156	-0.803604
i28	-0.995916	0.248443	0.035911	0.480661	0.230901	0.0419323	-0.751707	0.00757357	0.554733	0.147468	0.114703	0.143327	-0.94505	0.385902	0.301117	0.0532249	0.363947	0.0133784	-0.627982	0.197431	0.0618106	0.233891	0.0252361	0.477284	-0.798221
i29	-0.913023	0.325108	-0.0805261	0.472284	0.196157	0.0586571	-0.755217	8.80206e-06	0.537017	0.159534	-0.305043	0.000184806	-0.640214	-0.0182716	0.963344	0.0487853	0.307456	-0.000498241	-0.615305	0.259562	0.042569	0.191889	0.0551882	0.54531	-0.834956
i30	-0.903104	0.31407	-0.118719	0.239037	0.468716	0.10374	-0.777408	-0.0236657	0.439496	0.257837	-0.863003	-0.520822	-1.12293	-0.911332	3.41808	0.0443632	0.24694	-0.0232671	-0.575472	0.307436	0.103425	0.172243	0.103755	0.365522	-0.744945
i31	-0.892288	0.243835	-0.0573622	0.516973	0.188842	0.0510608	-0.81665	0.0191032	0.579661	0.166826	-0.173288	0.275586	-0.920418	0.398078	0.420042	0.0586996	0.314304	0.0149621	-0.629712	0.241746	0.046908	0.197888	0.034538	0.528859	-0.808192
i32	-0.987798	0.362332	-0.0134311	0.409982	0.228915	0.0951854	-0.747077	-0.00152437	0.422667	0.230749	-0.0770004	-0.0332667	-0.9664	0.116719	0.959948	0.0610958	0.239762	0.00303393	-0.645919	0.342027	0.0497869	0.191037	0.0364172	0.499177	-0.776418
i33	-0.863243	0.333009	0.00850833	0.368192	0.153535	0.0558682	-0.638684	0.0014454	0.343834	0.237536	0.0437906	0.0443421	-0.700439	0.251162	0.361145	0.0611583	0.340425	0.00810584	-0.694276	0.284587	0.0322805	0.297683	0.0147529	0.36022	-0.704936
i34	-0.963538	0.19679	-0.0269521	0.713749	0.079952	0.0475499	-0.847268	0.0122304	0.707931	0.0795563	-0.0899597	0.168947	-1.14565	0.33507	0.731598	0.0555644	0.228084	0.00781503	-0.539961	0.248498	0.0195265	0.080412	0.0535317	0.779588	-0.933058
i35	-0.848258	0.168922	-0.0300778	0.568988	0.140427	0.031786	-0.77273	0.0180134	0.510057	0.212873	-0.107098	0.340865	-1.15998	0.87939	0.0468274	0.0519933	0.247693	0.0225678	-0.533114	0.21086	0.0299433	0.241224	0.00280422	0.492038	-0.76601
i36	-0.947265	0.254536	0.151889	0.297034	0.243806	0.0432486	-0.748673	0.170402	0.391511	0.143511	0.114608	0.756728	-1.55154	0.0153474	0.664856	0.0408033	0.316527	0.00279406	-0.669437	0.309313	0.0517258	0.179195	0.186941	0.477719	-0.895581
i37	-0.929122	0.0920227	0.080589	0.309842	0.446669	0.027657	-0.831422	-0.0265843	0.568255	0.262094	0.152699	-0.167601	-1.0079	-0.402956	1.42576	0.0400796	0.244577	-0.0275093	-0.768149	0.511001	0.0593354	0.115844	0.099957	0.524767	-0.799904
i37.w.1	-0.91422	0.223422	-0.033971	0.0290819	0.695687	0.0641909	-0.964638	0.153978	0.421832	0.324637	-0.0172626	0.272339	-6.02985	-0.995023	6.76979	0.00214416	0.10825	-0.144368	-0.911507	0.945481	0.0222588	0.0361525	0.426251	0.410304	-0.894965
i40.11.a	-0.670657	0.18162	0.207298	0.0498386	0.231901	0.129561	-0.852223	0.371164	0.0512647	0.300232	0.0834982	0.209574	-0.658223	0.112	0.253151	0.075661	0.109097	0.422126	-0.924028	0.317144	0.124437	0.225837	0.337246	0.112099	-0.799619
i40.11.b	-0.792956	0.161148	0.122155	0.175805	0.333848	0.116859	-0.787007	0.238081	0.140145	0.291923	0.0674526	0.181291	-0.670236	0.119714	0.301778	0.145948	0.160438	0.17998	-0.865498	0.379132	0.12735	0.153561	0.208472	0.17421	-0.663594
i40.11.c	-0.503417	0.230394	0.0329281	0.0671728	0.172923	0.437647	-0.8397	0.12337	0.0940917	0.184592	0.309079	0.609616	-0.91783	0.111242	-0.112107	0.352328	0.259807	0.0621614	-0.643862	-0.0304343	0.416234	0.233908	-0.0287485	-0.0139667	-0.607426
i40.11.d	-0.501228	0.126396	0.0313493	0.0789766	0.264506	0.46994	-0.928895	0.124476	0.0246729	0.309806	0.24305	0.259564	-0.764757	0.15508	0.107063	0.444766	0.037372	0.112648	-0.724093	0.129308	0.462217	0.14561	0.0241314	0.0401236	-0.672083
i40.11.e	-0.454275	0.100582	0.0493268	0.0890627	0.215304	0.560962	-1.03501	0.0995903	0.0635634	0.310894	0.356654	0.129113	-1.1152	-0.113842	0.743271	0.503947	0.0644888	-0.0890896	-1.10474	0.625393	0.29833	0.0772406	0.142439	0.153147	-0.671156
i40.11.f	-0.652695	0.200582	0.224591	0.116416	0.111106	0.153462	-0.790026	0.386376	0.0278629	0.222325	0.0306899	0.0690088	-0.506003	0.04105	0.365254	0.0693525	0.0216955	0.178962	-0.784064	0.514054	0.0235963	0.0617143	0.567674	0.183259	-0.836243
i40.11.g	-0.827331	0.0713285	0.465521	0.105031	0.185451	0.0612043	-0.890653	0.595965	0.0320761	0.201408	0.10057	0.150049	-0.605763	0.0935088	0.261635	0.114241	0.0406602	0.47079	-0.567405	-0.0582867	0.0949682	0.120201	0.620175	-0.0274418	-0.807902
i40.11.h	-0.48353	0.0306742	-0.00167731	-0.0227409	0.477274	0.38961	-1.19871	0.239907	0.0891847	0.480004	-0.0102633	0.115574	-1.394	0.0221673	1.26652	-0.100035	0.0308872	0.0159362	-0.31007	0.363282	0.31623	0.0250393	0.137144	0.0547185	-0.533132
i40.11.i	9.20163	3.00148	-11.7239	-2.7218	2.24259	27.2933	8.38896	-30.4946	-8.02918	2.84149	-10.8838	-3.11322	12.8033	3.85524	-2.66155	-19.5761	-6.35068	29.8685	0.381967	-4.32367	0.820664	0.114351	-1.04916	-0.219987	0.334129
i40.11.j	-1.99283	-0.0401366	-0.253184	0.940996	1.34516	-3.19354	-1.34041	0.0636925	2.63263	1.83763	-3.35122	0.0105955	7.34306	-5.44513	1.44269	11.9949	0.421762	-5.24387	4.28598	-11.4588	3.61536	0.0620734	0.292945	-2.41606	-1.55432
i40.11.k	-0.015739	0.0989874	-0.707022	0.129853	0.493921	0.757439	-1.15574	-0.418602	-0.0254215	0.842322	-1.53999	-0.119157	0.174744	-0.24727	1.73167	0.741703	-0.0189764	-0.648433	-0.248523	0.174229	0.433903	0.0967042	0.698419	0.0267964	-1.25582
i40.11.l	-0.705047	0.105632	0.148912	0.0477875	0.402716	0.240281	-0.903093	0.221227	0.161224	0.28036	0.265419	0.173347	-0.888947	0.210467	0.239715	0.0992086	0.147143	0.245141	-1.12196	0.630471	0.242981	0.0743644	0.0811461	0.183233	-0.581725
i40.12	-0.647564	0.116771	0.290886	0.0507118	0.189195	0.288958	-0.830199	0.400254	0.00787229	0.133115	0.297812	0.165597	-0.746348	0.0964859	0.186453	0.170048	0.0106675	0.316016	-0.694955	0.198223	0.308993	0.0878543	0.297433	0.0965448	-0.790825
i40.13	-0.633651	0.127198	0.283889	0.0461378	0.176427	0.314042	-0.839879	0.377599	0.0355765	0.112662	0.319477	0.172113	-0.749906	0.107262	0.151054	0.171971	0.0537096	0.355266	-0.621859	0.0409131	0.351392	0.0908857	0.267342	0.0218621	-0.731482
i40.2	-0.743811	0.139266	0.204615	0.130444	0.269487	0.0575662	-0.812901	0.25195	0.196322	0.307063	0.0625731	0.186398	-0.78607	0.184466	0.352633	0.0893033	0.325153	0.412961	-1.0151	0.187685	0.0600051	0.165407	0.256758	0.0610432	-0.543213
i40.3	-0.706813	0.0828124	0.0566047	0.103416	0.46398	0.0618331	-0.650847	0.279756	0.1007	0.208557	0.0141682	0.0937815	-0.600894	0.133212	0.359733	0.0559239	0.072931	0.287799	-0.803198	0.386544	0.121775	0.0733089	0.377202	0.187606	-0.759892
i41	-0.750597	0.297735	0.0483	0.115211	0.28935	0.353758	-0.877084	0.0571512	0.20275	0.263425	0.30102	0.299776	-1.19506	0.486219	0.108049	0.203335	0.301164	0.13769	-0.823666	0.181478	0.343942	0.263537	0.0206079	0.122227	-0.750314
i45	-0.941249	0.223712	0.1129	0.520233	0.0844036	0.0412638	-0.704219	0.0203414	0.448505	0.194109	0.293805	0.286992	-1.41711	0.408707	0.427605	0.0602843	0.28177	0.0181992	-0.586224	0.22597	0.0211299	0.263452	0.041135	0.488182	-0.813899
i45.w	-0.911808	0.472153	-0.0290286	0.280129	0.188554	0.0470157	-0.472089	0.00466417	0.215847	0.204562	-0.107176	0.172936	-0.977781	0.36307	0.548951	0.152162	1.17743	0.0534155	-1.71169	0.328687	0.0515562	0.561705	0.0406543	0.165455	-0.81937
i50.a	-0.849755	0.5609	-0.00850029	0.130056	0.1673	0.0932932	-0.402761	0.0111063	0.0851732	0.213188	-0.0429669	0.337523	-0.712759	0.0977239	0.320479	0.15477	0.609389	0.0230068	-1.01312	0.22595	0.0884768	0.677846	0.0335299	0.100413	-0.900265
i50.b	-0.97135	0.326081	0.0090586	0.0740411	0.562169	0.0449047	-0.668434	0.00347209	0.116376	0.503682	0.0366538	0.102019	-0.66365	-0.0585375	0.583514	0.0369192	0.421381	-0.00721363	-1.04504	0.593956	0.0596443	0.388053	0.0153001	0.12638	-0.589377
i51	-0.874742	0.638438	0.0508611	-0.0289705	0.214413	0.0942133	-0.345868	0.0196524	0.011918	0.220084	0.359759	0.941993	-1.62271	0.174646	0.146314	-0.136645	0.380933	0.116458	-0.684301	0.323555	0.0913409	0.635346	0.008812	0.0292229	-0.764721
i52	-0.869195	0.734722	0.0249409	-0.00654153	0.116074	0.126461	-0.244662	0.0136933	0.0177431	0.0867642	0.303326	0.967542	-1.28541	0.0481394	-0.0335967	-0.0476892	0.75151	0.0288565	-0.642083	-0.0905947	0.176353	0.765867	-0.00419708	-0.0188804	-0.919143
i55	-0.852997	0.43678	-0.0290873	0.234187	0.211117	0.0779793	-0.514125	0.00947536	0.192554	0.234117	-0.112104	0.204549	-0.791691	0.04093	0.658317	0.0939817	0.432828	0.0042619	-0.708741	0.17767	0.0896462	0.556831	0.0725311	0.187993	-0.907002
i60.1	-0.734641	0.125218	0.169811	0.0428252	0.396787	0.198737	-0.816487	0.0575245	0.0280404	0.532186	0.803998	0.171604	-1.48133	-0.101074	0.606802	0.377541	0.155753	-0.188199	-0.0497063	-0.295389	0.310651	0.262521	0.10034	-0.0262328	-0.647279
i60.2	-1.12017	0.330695	0.433425	0.0510517	0.304997	0.0663963	-0.549449	0.0974738	0.0340964	0.351482	0.34421	0.38555	-1.10402	-0.0300209	0.404284	0.210905	0.701565	-0.156167	-0.886608	0.130306	0.0813685	0.467033	0.135812	0.00841491	-0.692629
i60.3	-0.868096	0.229969	0.122777	-0.0335337	0.548884	0.187636	-0.81708	0.101208	0.00163367	0.526602	0.32142	0.324728	-1.2168	0.124032	0.44662	-0.0784189	0.00468224	0.110795	-0.691941	0.654883	0.180039	0.2117	0.0559591	0.0918569	-0.539555
i61.1	-0.937411	0.289425	0.0635574	-0.0164384	0.600867	0.22081	-0.929779	-0.00182926	0.0294572	0.681341	0.384483	-0.0145045	-0.96614	-0.232018	0.82818	-0.0703702	0.165286	-0.164187	-0.783002	0.852274	0.161307	0.239749	0.0367528	0.0534474	-0.491256
i61.2	-0.885355	0.225013	0.0557065	0.0101296	0.594506	0.297555	-0.962072	-0.0624125	-0.00778581	0.734715	0.193632	-0.164053	-0.987396	-0.148277	1.10609	0.0220828	-0.0128353	-0.0929954	-1.08994	1.17369	0.18119	0.169331	0.0969835	0.164085	-0.61159
i62	-1.01173	0.183022	0.288847	-0.0296878	0.569554	0.0893892	-0.826656	0.127336	0.0539285	0.556002	0.325497	0.293799	-1.29976	0.0974059	0.583062	-0.0781175	0.290542	0.227445	-0.595083	0.155214	0.120439	0.240728	0.109412	0.0124736	-0.483053
i63	-0.863938	0.2784	0.0700581	0.0545015	0.460978	0.100091	-0.680878	0.014003	0.00998053	0.556803	0.407212	0.22639	-1.1763	-0.1845	0.7272	0.258602	0.131719	-0.150611	-0.882963	0.643253	0.12256	0.41176	0.033263	0.0360436	-0.603626
i64	-0.806485	0.460652	0.000848318	-0.0241941	0.369179	0.275916	-0.646701	0.00607518	0.0339606	0.330749	0.020217	0.24172	-0.665954	-0.200043	0.60406	-0.137522	0.322281	-0.0477122	-0.903592	0.766546	0.207176	0.309883	0.0142241	0.0756795	-0.606963
i65	-0.900831	0.357195	0.0254546	0.0801498	0.438031	0.0937067	-0.626092	0.00591799	0.0232456	0.503221	0.313209	0.277574	-1.09693	-0.0156331	0.521784	0.236024	0.260933	-0.00374135	-1.1251	0.631881	0.0871438	0.381615	0.00843633	0.0426888	-0.519884
i66	-0.930354	0.223374	-0.00655015	-0.0187334	0.732264	0.0519141	-0.711266	0.0045195	0.0274053	0.627427	-0.0357116	0.106022	-0.82861	0.624988	0.133312	-0.028133	0.177085	0.172153	-0.833066	0.511962	0.0683281	0.251908	0.00228161	0.0318104	-0.354328
i67	-0.945304	0.390773	0.00852409	-0.0272036	0.57321	0.0853297	-0.657373	0.00658375	0.0224086	0.543051	0.0754253	0.266788	-1.19339	0.0940179	0.757157	-0.0566747	0.213797	0.0221363	-0.835053	0.655794	0.0751484	0.32604	0.0112182	0.0412678	-0.453674
i70	-0.499978	0.0704702	0.0207958	0.134936	0.273775	0.461788	-0.890689	0.00513856	0.0933501	0.330413	0.688329	0.0259552	-1.51019	0.205531	0.590371	0.421008	0.0444468	0.0193741	-0.785475	0.300646	0.461968	0.085082	0.030097	0.162597	-0.739744
i71	-0.642752	0.152718	0.0457723	0.0627694	0.381492	0.340621	-0.887225	0.0645032	0.032645	0.449456	0.660662	0.417425	-1.61815	-0.449632	0.989698	0.375564	0.0875734	-0.186387	-0.75786	0.48111	0.319436	0.168735	0.0574149	0.0673297	-0.612916
i72	-0.925578	0.400312	0.0218278	0.0830391	0.420399	0.0714556	-0.57334	0.00344736	0.0387701	0.459667	0.218681	0.193486	-1.16544	-0.288862	1.04213	0.128979	0.337362	-0.0447843	-1.15819	0.736628	0.0720111	0.441106	0.017818	0.081236	-0.612171
i73	-0.915996	0.599706	0.0437536	0.059378	0.213159	0.115436	-0.555651	0.0151678	0.0633143	0.361733	0.188333	0.33918	-0.954736	-0.378989	0.806212	0.0629412	0.348664	-0.0933304	-1.14229	0.824013	0.0508685	0.448467	0.0446975	0.185511	-0.729544
i74	-0.938992	0.36258	0.0303446	0.140173	0.405894	0.0385382	-0.608013	0.0100202	0.0959744	0.46348	0.131936	0.409895	-1.25271	-0.249508	0.960391	0.0879331	0.566442	-0.0359988	-1.12492	0.50654	0.0403543	0.433532	0.0219605	0.0802793	-0.576126
i75	-0.895491	0.411319	0.0275784	0.087683	0.36891	0.119018	-0.551785	0.0248807	0.108736	0.299151	0.160532	0.500521	-1.07968	0.15469	0.263936	0.106123	0.454813	0.0321637	-0.953817	0.360717	0.169818	0.475904	0.0208722	0.137194	-0.803788
i80	-0.874794	0.680182	0.0468617	-0.0185422	0.166292	0.078106	-0.362897	0.0236439	0.0661118	0.195035	0.150843	0.662777	-1.31281	-0.0663264	0.565516	-0.0207173	0.643269	-0.0230225	-0.810286	0.210756	0.0646414	0.660226	0.0682932	0.0733241	-0.866485
i85	-0.968278	0.548573	0.0241094	0.0517505	0.343845	0.0543811	-0.461412	0.020415	0.152011	0.234605	0.0551875	0.471402	-1.10591	-0.115135	0.694456	0.0180406	0.534563	-0.0175344	-0.972144	0.437075	0.0702812	0.483727	0.0620107	0.256269	-0.872288
i90.1.a	-0.85076	0.293038	-0.0438154	0.216551	0.384986	0.185974	-0.790167	-0.01333	0.0738051	0.543718	-0.194346	-0.0931645	-0.66559	-0.294084	1.24719	0.266857	0.14331	-0.0817032	-0.854527	0.526064	0.0977319	0.217488	0.0713792	0.108371	-0.49497
i90.1.b	-0.87207	0.278149	-0.014348	0.201968	0.406301	0.173348	-0.776055	-0.0604575	0.0923485	0.570816	-0.0522407	-0.353203	-0.688363	-0.547102	1.64091	0.257727	0.189088	-0.191746	-0.585286	0.330218	0.0962849	0.217051	0.106801	0.0613244	-0.481462
i90.1.c	-0.941251	0.271738	0.104563	0.135741	0.42921	0.165654	-0.786847	0.0253306	0.0221592	0.573702	0.401688	0.159626	-1.74357	0.0757979	1.10646	0.184481	0.0494016	0.0268156	-0.815033	0.554335	0.102031	0.223716	0.0684683	0.0969608	-0.491177
i90.1.d	-0.87498	0.305192	0.0145393	0.146153	0.409095	0.173194	-0.761926	-0.0133425	0.085168	0.516907	0.0643481	-0.104057	-0.930286	-0.115251	1.08525	0.179367	0.184184	-0.0319586	-0.880066	0.548473	0.103014	0.229364	0.0617458	0.112536	-0.506661
i90.1.e	-0.880691	0.303721	-0.0166416	0.260675	0.332936	0.189968	-0.767733	-0.0245093	0.058474	0.5438	-0.0659568	-0.155307	-0.941785	-0.192638	1.35569	0.316783	0.113611	-0.0590663	-0.83026	0.458933	0.0720214	0.188076	0.0739938	0.0816936	-0.415785
i90.1.f	-0.872869	0.312713	-0.0216291	0.147671	0.434114	0.201756	-0.753898	-0.0394942	0.0485237	0.543113	-0.083039	-0.235017	-0.87302	-0.000860737	1.19194	0.185145	0.0942958	-0.000281089	-0.842658	0.563498	0.101553	0.196925	0.0726272	0.105139	-0.476245
i90.1.g	-0.899835	0.278393	0.0160368	0.1402	0.465205	0.169367	-0.751193	-0.0292014	0.0805001	0.530527	0.0644434	-0.192884	-0.918522	-0.186241	1.2332	0.176181	0.166279	-0.0582404	-0.914323	0.630104	0.114165	0.214005	0.0753111	0.123052	-0.526532
i90.3.a	-0.880645	0.248344	0.0657219	0.307025	0.259553	0.162982	-0.744426	-0.0422522	0.110073	0.513623	0.447664	-0.438537	-1.31628	-0.808592	2.11574	0.389065	0.212542	-0.15043	-0.934293	0.483116	0.0518339	0.156296	0.062031	0.0761363	-0.346297
i90.3.b	NA	NA	NA	NA	NA	NA	NA	NA	NA	NA	NA	NA	NA	NA	NA	NA	NA	NA	NA	NA	NA	NA	NA	NA	NA
i90.3.c	-0.905264	0.243891	0.0385204	0.151676	0.471177	0.150413	-0.726021	-0.0395054	0.10825	0.506864	0.369352	-0.614211	-0.640733	-0.431296	1.31689	0.200067	0.231525	-0.0593314	-0.89487	0.522609	0.12196	0.212733	0.0355493	0.102553	-0.472795
i90.4.a	-0.912992	0.26382	0.100349	0.105323	0.443501	0.145794	-0.775	0.0214342	0.0976605	0.510111	0.16955	0.0655331	-1.14326	0.0439078	0.864265	0.12601	0.211432	0.0310915	-0.926616	0.558081	0.0939783	0.195598	0.108391	0.0988427	-0.49681
i90.4.b	-0.962173	-0.00907078	0.633603	-0.0895409	0.427181	-0.00599127	-0.683136	0.213686	0.0089519	0.466489	1.51172	0.77189	-0.377954	-0.436418	-1.46923	-0.0823834	0.0124698	-0.168294	-0.50554	0.743747	0.0439602	0.0726799	-0.0633702	0.0831867	-0.136456
i90.5.a	-0.910471	0.290164	0.0693672	0.137758	0.413182	0.169743	-0.729744	-8.55502e-05	0.115515	0.444571	0.15801	-0.000333122	-0.967394	0.0540768	0.755641	0.168481	0.241504	0.0290345	-0.968958	0.529939	0.104334	0.191901	0.0837662	0.109415	-0.489416
i90.5.b	-0.921223	0.295813	0.0801186	0.160428	0.384864	0.165322	-0.738453	0.00442691	0.120365	0.448339	0.200094	0.0197827	-1.03682	0.0171188	0.799829	0.194708	0.26139	0.00831912	-0.934125	0.469707	0.0973154	0.202846	0.0809789	0.0978585	-0.478999
i90.6.a	-0.928172	0.27144	0.0211436	0.0773618	0.558226	0.14733	-0.7968	0.0119761	0.136187	0.501306	0.0873225	0.0911268	-1.073	0.204395	0.690154	0.0888048	0.288024	0.0568111	-1.01483	0.581187	0.11882	0.196591	0.0355695	0.107767	-0.458748
i90.6.b	-0.925526	0.268178	0.0100485	0.0906839	0.556615	0.147879	-0.777134	0.000802001	0.123094	0.50536	0.0514547	0.00744763	-0.939719	0.163791	0.717026	0.106092	0.26116	0.0374212	-0.9851	0.580427	0.12221	0.20122	0.0307441	0.10893	-0.463103
i90.6.c	-0.947491	0.287795	0.047144	0.0720876	0.540464	0.159632	-0.733604	-0.0448908	0.10246	0.516404	0.197775	-0.339521	-0.807564	0.0457076	0.903603	0.0781231	0.200187	0.0118076	-1.07847	0.788356	0.0977554	0.168395	0.0389589	0.131576	-0.436685
i90.6.d	-0.894554	0.295004	0.00381576	0.127417	0.468317	0.167255	-0.75616	-0.00356421	0.0973925	0.495077	0.0242333	-0.0399249	-0.835685	0.232992	0.618385	0.158683	0.213933	0.045689	-0.947998	0.529693	0.114731	0.213925	0.0238543	0.104199	-0.45671
i90.6.e	-0.948753	0.270482	0.0344224	0.036896	0.606952	0.14187	-0.771211	-0.0465059	0.0865169	0.58933	0.121124	-0.311994	-1.23301	0.0160888	1.40779	0.0362138	0.161899	0.00448776	-1.05762	0.855017	0.0875869	0.162141	0.0577343	0.125709	-0.43317
i90.6.f	-0.986037	0.245909	0.056009	0.0549242	0.629194	0.135784	-0.755388	-0.0486137	0.0962204	0.571997	0.266011	-0.418145	-0.695932	0.22665	0.621415	0.0602155	0.191046	0.052319	-1.0017	0.69812	0.110833	0.182475	0.0230475	0.112168	-0.428522
i91	-1.00814	0.145869	0.107162	0.195367	0.559742	0.0212032	-0.633654	0.024212	0.0666398	0.521599	0.147749	0.229657	-1.07047	0.441556	0.251506	0.0831946	0.195227	0.136378	-0.666581	0.251782	0.0514994	0.330152	0.0167833	0.0543996	-0.452834
i92	-0.909243	0.254159	0.0488715	0.0597348	0.546478	0.0920999	-0.767729	0.0317676	0.135294	0.508567	0.185292	0.332378	-1.10082	0.134233	0.448915	0.0609625	0.381032	0.0361322	-1.07806	0.599936	0.113427	0.291299	0.0245758	0.122015	-0.551318
i93	-0.938048	0.364995	0.0654558	0.155033	0.352564	0.0864085	-0.636301	0.00484603	0.105942	0.439104	0.160898	0.0503176	-0.658991	-0.194544	0.642319	0.119167	0.343979	-0.0608342	-0.82521	0.422898	0.0803094	0.4225	0.0595219	0.125323	-0.687655
i95	-0.658594	0.288829	0.0752262	0.00144218	0.293096	0.179938	-0.650658	0.0154679	0.25222	0.203032	1.13402	0.374284	-2.72313	0.257711	0.957114	0.00227986	0.640008	0.0270252	-0.211453	-0.45786	0.244174	0.271502	0.0528933	-0.241287	-0.327282

## Sheet: Elast_Opt
Industry	e_KK	e_KL	e_KE	e_KM	e_KS	e_LK	e_LL	e_LE	e_LM	e_LS	e_EK	e_EL	e_EE	e_EM	e_ES	e_MK	e_ML	e_ME	e_MM	e_MS	e_SK	e_SL	e_SE	e_SM	e_SS
i01.a i01.b i01.c	-0.728936	0.184933	0.106053	0.178859	0.259091	0.263882	-0.76399	0.06384	0.169944	0.266324	0.229464	0.0968031	-1.08931	0.267011	0.496032	0.156713	0.104353	0.108127	-0.73106	0.361868	0.179949	0.129632	0.159226	0.286848	-0.755655
i01.d	-0.734053	0.192899	0.101863	0.150072	0.289219	0.247948	-0.75472	0.0595952	0.048849	0.398328	0.340715	0.15508	-1.0902	0.43942	0.154989	0.130522	0.0330529	0.114258	-0.64944	0.371607	0.23674	0.253662	0.0379289	0.34974	-0.878071
i01.e	-0.84642	0.186206	0.133673	0.190271	0.33627	0.157561	-0.683133	0.0855318	0.155757	0.284283	0.284782	0.215347	-1.21632	0.28444	0.431751	0.173656	0.167999	0.121854	-0.762501	0.298992	0.173116	0.172959	0.104331	0.168652	-0.619059
i01.f i01.g i01.h	-0.855527	0.0950207	0.107348	0.314726	0.338432	0.117353	-0.843004	0.113391	0.228792	0.383468	0.267919	0.229145	-1.17016	0.200303	0.472791	0.30101	0.177178	0.0767586	-1.1034	0.548451	0.178615	0.16387	0.0999787	0.302648	-0.745111
i01.i i01.n	-0.878255	0.0923471	0.0857903	0.441005	0.259113	0.129113	-0.849624	-0.00701689	0.513689	0.213838	0.330657	-0.0193436	-1.28151	0.623315	0.346882	0.141674	0.118032	0.0519535	-0.531533	0.219873	0.170391	0.100576	0.0591835	0.450074	-0.780225
i01.j i01.k i01.l	-0.83893	0.0971865	0.109004	0.395203	0.237537	0.15202	-0.763687	0.0106182	0.443833	0.157215	0.393331	0.0244947	-1.28325	0.526662	0.338763	0.176793	0.126931	0.065292	-0.619124	0.250108	0.196511	0.0831486	0.0776668	0.462529	-0.819855
i01.m i01.o	-0.694783	0.0787212	0.125866	0.224993	0.265202	0.234433	-0.827833	0.115424	0.236975	0.241001	0.517746	0.159432	-3.08161	0.311419	2.09301	0.32349	0.114411	0.108851	-0.846907	0.300155	0.151877	0.0463456	0.291394	0.119555	-0.609172
i02	-1.26657	0.329199	0.226648	0.529158	0.181561	0.138488	-0.709277	0.0536487	0.266998	0.250143	0.493237	0.277529	-1.25791	0.280715	0.206429	0.195519	0.234508	0.0476612	-0.755899	0.278211	0.0830547	0.272004	0.0433919	0.34444	-0.742891
i05	-0.866263	0.255273	0.291873	0.409998	-0.0908808	0.167772	-0.64424	0.131403	0.25101	0.0940549	0.373826	0.256075	-1.44295	0.670649	0.142405	0.210057	0.195673	0.268271	-0.751719	0.0777186	-0.0403266	0.0635018	0.0493366	0.0673116	-0.139823
i10	-0.78893	0.225367	0.0519462	0.257214	0.254403	0.096192	-0.700565	0.170482	0.243464	0.190427	0.0496191	0.381527	-0.828754	0.202345	0.195263	0.132759	0.294411	0.109337	-0.80445	0.267943	0.0787261	0.138063	0.063259	0.160647	-0.440696
i11.a i11.b i11.c	-0.628454	0.235367	0.131897	-0.0515892	0.312779	0.233595	-0.712446	0.044916	0.102071	0.331864	0.3242	0.11124	-1.37902	0.394704	0.548878	-0.129325	0.257816	0.402549	-1.16666	0.635623	0.138394	0.147953	0.098805	0.11219	-0.497342
i12	-0.814956	0.0541401	0.00693981	0.0607533	0.693122	0.0267884	-0.710592	0.123163	0.295714	0.264928	0.0119794	0.429675	-1.03301	0.161219	0.430141	0.0429947	0.422949	0.0660955	-0.410689	-0.121351	0.22738	0.175647	0.0817456	-0.0562522	-0.428521
i13.1 i13.20.11 i13.20.12 i13.20.13 i13.20.14 i13.20.15 i13.20.16	-0.901254	0.244166	-0.0970036	0.256236	0.497855	0.215666	-0.721694	0.00140409	0.166277	0.338346	-0.423761	0.00694433	-1.09841	0.550507	0.964717	0.281864	0.207078	0.138621	-0.832474	0.204911	0.241069	0.185483	0.106932	0.0901998	-0.623684
i14.1 i14.2 i14.3	-0.936199	0.353812	0.00457371	0.168963	0.40885	0.145079	-0.632012	0.0468848	0.191002	0.249046	0.0114655	0.286631	-0.984563	0.219142	0.467324	0.120111	0.331127	0.0621428	-0.896657	0.383276	0.211468	0.314143	0.0964216	0.278871	-0.900904
i15.a	-0.97091	0.114537	-0.0393743	0.56914	0.326607	0.0317643	-0.876716	0.0167024	0.525376	0.302874	-0.0989838	0.151403	-0.927916	0.585121	0.290376	0.029398	0.0978525	0.0120224	-0.429619	0.290346	0.0360622	0.120585	0.0127537	0.620647	-0.790047
i15.b	-0.96248	0.194017	-0.0518584	0.545449	0.274872	0.033777	-0.76681	0.0515071	0.528607	0.152919	-0.119305	0.680651	-1.3796	0.309794	0.508457	0.0233358	0.129903	0.00576106	-0.44228	0.28328	0.0252178	0.0805854	0.0202765	0.607471	-0.73355
i15.c	-0.935454	0.30984	-0.0359591	0.430368	0.231205	0.0518053	-0.717492	0.00810736	0.44726	0.210319	-0.220898	0.297869	-1.24139	0.337749	0.826669	0.046251	0.287478	0.00590869	-0.608683	0.269046	0.0430383	0.234152	0.0250499	0.466018	-0.768259
i15.d	-0.842025	0.229213	-0.094097	0.575568	0.131341	0.0625463	-0.797467	0.0198728	0.358253	0.356795	-0.46972	0.363547	-1.31697	-0.103258	1.5264	0.115002	0.262324	-0.00413305	-0.662566	0.289373	0.0252275	0.251147	0.0587325	0.278177	-0.613284
i15.e	-0.980809	0.457513	-0.00781508	0.24985	0.281261	0.025076	-0.487723	0.031946	0.243739	0.186963	-0.0182615	1.36196	-1.91259	0.333818	0.235071	0.0259632	0.462114	0.0148452	-0.827202	0.32428	0.0269201	0.326488	0.00962858	0.298681	-0.661717
i15.f	-0.975568	-0.0342955	0.081746	0.797836	0.130281	-0.0157385	-1.0209	0.104699	0.811763	0.120175	0.1062	0.296398	-1.33982	0.408027	0.529199	0.0449198	0.0995921	0.0176829	-0.467413	0.305218	0.017487	0.0351496	0.0546756	0.727646	-0.834958
i15.g i15.i	-0.950245	0.126643	0.0214788	0.590094	0.212029	0.0459364	-0.898744	0.0545983	0.650438	0.147771	0.0604014	0.423291	-1.27364	0.125495	0.664451	0.0595161	0.18086	0.00450093	-0.529601	0.284724	0.0475423	0.0913476	0.0529798	0.632988	-0.824858
i15.h	-0.92423	0.152317	-0.0302225	0.411239	0.390897	0.0150418	-0.638014	0.0237091	0.408296	0.190968	-0.0426814	0.339055	-1.19029	0.232806	0.661109	0.0225298	0.226509	0.00903129	-0.499428	0.241359	0.0398332	0.197056	0.0477032	0.448934	-0.733527
i15.j	-0.966453	0.0851366	0.145123	0.377568	0.358625	0.0234781	-0.912809	0.0827189	0.512947	0.293665	0.12595	0.260328	-1.21176	0.174391	0.651093	0.0358646	0.176684	0.0190868	-0.635654	0.404019	0.0351555	0.10439	0.0735414	0.416949	-0.630036
i15.k	-0.998296	-0.0211148	0.10859	0.499481	0.41134	-0.00733925	-0.933589	0.0453449	0.624457	0.271127	0.115589	0.138865	-1.25472	0.360784	0.639484	0.0242685	0.0872894	0.016468	-0.460103	0.332077	0.0298012	0.0565121	0.0435244	0.495164	-0.625002
i16	-0.644418	0.185825	0.00450814	0.315681	0.138404	0.166795	-0.880165	0.00604799	0.211392	0.49593	0.0419317	0.0626725	-1.06179	0.085889	0.871292	0.173961	0.129781	0.00508857	-0.643604	0.334773	0.051447	0.205377	0.0348201	0.225818	-0.517463
i17 i18	-0.956521	0.322925	0.0838982	0.384364	0.165335	0.0675302	-0.822931	0.130401	0.414551	0.210449	0.0903806	0.671747	-1.27219	0.0849455	0.425112	0.0649954	0.335213	0.0133339	-0.70141	0.287868	0.0351551	0.213981	0.0839084	0.361974	-0.695019
i19	-1.05166	0.255031	-0.0265901	0.431458	0.391766	0.0395653	-0.773926	0.0312575	0.406403	0.2967	-0.0523799	0.396897	-1.56289	0.0450991	1.17328	0.0397219	0.241172	0.00210772	-0.631834	0.348833	0.0422093	0.206052	0.0641706	0.408232	-0.720664
i20	-0.997767	0.16435	0.201102	0.525949	0.106366	0.0336108	-0.833117	0.0812575	0.521865	0.196384	0.162902	0.321859	-1.11463	0.584246	0.0456251	0.0510738	0.247801	0.0700388	-0.681891	0.312977	0.0201488	0.181905	0.0106694	0.610527	-0.82325
i20.w	-1.04003	0.182933	0.309612	0.31705	0.230435	0.0374092	-0.788618	0.109748	0.392514	0.248946	0.217335	0.376724	-1.19869	0.43342	0.171209	0.0462204	0.279816	0.0900122	-0.759065	0.343017	0.0402894	0.212843	0.0426439	0.411389	-0.707165
i21.1 i21.w.1 i21.2	-0.888045	0.116357	0.11735	0.551101	0.103236	0.0442516	-0.782749	0.00639348	0.523086	0.209018	0.288325	0.0413049	-1.0619	0.192644	0.539632	0.0857522	0.214019	0.0122003	-0.505171	0.1932	0.0365986	0.194841	0.0778628	0.440173	-0.749475
i22	-0.985566	0.326562	0.000708275	0.205317	0.452979	0.0664452	-0.687383	0.00759507	0.337158	0.276184	0.00383789	0.202267	-0.817333	0.332357	0.278871	0.0458669	0.370179	0.0137022	-0.808351	0.378604	0.0947461	0.283912	0.0107646	0.354481	-0.743904
i23.1 i23.2 i23.3	-0.562827	0.0797863	0.466125	0.0390857	-0.0221701	0.0617742	-0.645406	0.575366	0.0153926	-0.00712771	0.034762	0.0554203	-0.412023	0.0681669	0.253673	0.0258526	0.0131499	0.604586	-0.998331	0.354743	-0.00484846	-0.0020133	0.74389	0.117291	-0.854319
i24.1 i24.1.w	-0.893951	0.342303	0.102349	0.178748	0.270551	0.119208	-0.698055	0.156744	0.217412	0.20469	0.175186	0.770392	-1.11582	-0.124011	0.294258	0.108646	0.379456	-0.0440369	-0.741104	0.297038	0.131596	0.285887	0.0836189	0.237701	-0.738802
i24.2 i24.3	-0.874364	0.317547	0.0524857	0.19272	0.311611	0.107015	-0.804318	0.244392	0.189959	0.262952	0.0432517	0.597605	-2.04177	0.593728	0.807182	0.0641267	0.187558	0.239738	-1.07508	0.583655	0.046471	0.116362	0.146076	0.261585	-0.570494
i24.4	-0.962779	0.0264415	0.292103	0.235893	0.408341	0.0112257	-0.965548	0.196065	0.390127	0.36813	0.124089	0.196188	-1.14477	0.176308	0.648181	0.0297311	0.115818	0.0523084	-0.663165	0.465307	0.0388101	0.0824132	0.145017	0.350884	-0.617125
i25	-0.870368	0.213419	0.0386149	0.487242	0.131093	0.0501864	-0.758662	0.0164752	0.522628	0.169372	0.100878	0.183028	-1.21206	0.45933	0.468826	0.0517184	0.235907	0.0186631	-0.483413	0.177124	0.0408597	0.224494	0.0559354	0.520108	-0.841398
i26.a i26.w.1 i26.b i26.c i26.d i26.d.w i26.e	-0.98778	0.221022	0.133307	0.364358	0.269093	0.0645391	-0.741951	0.0591761	0.376427	0.241809	0.192623	0.292828	-1.35671	0.196324	0.674938	0.0753493	0.26659	0.0280977	-0.657119	0.287082	0.0690838	0.212598	0.119918	0.356394	-0.757994
i27.a i27.a.w	-0.994303	0.333943	0.0608511	0.488934	0.110575	0.135955	-0.978729	0.13652	0.582003	0.124251	0.055826	0.307639	-1.06623	0.40161	0.301154	0.0735743	0.215119	0.0658738	-0.578521	0.223954	0.0367802	0.101515	0.109188	0.495038	-0.742521
i27.41 i27.41.w	-1.085	0.264051	-0.0057933	0.420011	0.406732	0.106574	-1.03253	-0.00651955	0.584219	0.348256	-0.00577634	-0.0161058	-0.986697	0.264359	0.74422	0.022511	0.0775798	0.0142102	-0.418178	0.303877	0.044415	0.0942234	0.0815074	0.619135	-0.83928
i27.42 i27.42.w	-0.941148	0.245772	0.0320058	0.462056	0.201315	0.0922581	-0.954466	0.0590301	0.604765	0.198413	0.0235865	0.115887	-1.13129	0.287888	0.703928	0.0459129	0.160086	0.0388176	-0.602264	0.357448	0.0299696	0.0786869	0.1422	0.535523	-0.78638
i27.43 i27.43.w	-0.908927	0.407096	-0.228743	0.586985	0.143589	0.138065	-0.822088	-0.0393275	0.673774	0.0495761	-0.453903	-0.230105	-0.713579	0.53771	0.859877	0.060526	0.204854	0.0279414	-0.514008	0.220687	0.0429171	0.0436912	0.129518	0.639688	-0.855814
i27.44 i27.44.w	-1.17647	0.36533	-0.0542398	0.736191	0.129191	0.0820342	-0.885887	-0.0470371	0.825287	0.0256027	-0.0638467	-0.246576	-1.13718	0.699759	0.747845	0.0373041	0.186235	0.0301227	-0.435868	0.182207	0.0250624	0.022119	0.123248	0.69757	-0.868
i27.45 i27.45.w	-0.924317	0.519784	-0.167592	0.520424	0.0517018	0.129734	-0.922598	-0.0316293	0.668823	0.155669	-0.0793619	-0.0600089	-0.787449	0.478071	0.448748	0.0177402	0.0913444	0.0344141	-0.517762	0.374263	0.00269813	0.0325484	0.049454	0.57297	-0.65767
i27.5	-0.898394	0.348	-0.26802	0.435899	0.382515	0.0508168	-0.922984	0.139373	0.649033	0.0837606	-0.150776	0.536926	-1.44763	0.374991	0.686485	0.020775	0.211833	0.0317695	-0.494813	0.230435	0.0438416	0.0657429	0.139863	0.554156	-0.803604
i28	-0.995916	0.248443	0.035911	0.480661	0.230901	0.0419323	-0.751707	0.00757357	0.554733	0.147468	0.114703	0.143327	-0.94505	0.385902	0.301117	0.0532249	0.363947	0.0133784	-0.627982	0.197431	0.0618106	0.233891	0.0252361	0.477284	-0.798221
i29	-0.913023	0.325108	-0.0805261	0.472284	0.196157	0.0586571	-0.755217	8.80206e-06	0.537017	0.159534	-0.305043	0.000184806	-0.640214	-0.0182716	0.963344	0.0487853	0.307456	-0.000498241	-0.615305	0.259562	0.042569	0.191889	0.0551882	0.54531	-0.834956
i30 i32 i33	-0.906876	0.31867	-0.0388977	0.359921	0.267183	0.0687237	-0.738003	-0.00387447	0.403418	0.269735	-0.235105	-0.108589	-0.936106	0.01355	1.26625	0.0535816	0.278483	0.00033374	-0.658319	0.32592	0.0549648	0.257305	0.043098	0.45038	-0.805747
i31	-0.892288	0.243835	-0.0573622	0.516973	0.188842	0.0510608	-0.81665	0.0191032	0.579661	0.166826	-0.173288	0.275586	-0.920418	0.398078	0.420042	0.0586996	0.314304	0.0149621	-0.629712	0.241746	0.046908	0.197888	0.034538	0.528859	-0.808192
i34	-0.963538	0.19679	-0.0269521	0.713749	0.079952	0.0475499	-0.847268	0.0122304	0.707931	0.0795563	-0.0899597	0.168947	-1.14565	0.33507	0.731598	0.0555644	0.228084	0.00781503	-0.539961	0.248498	0.0195265	0.080412	0.0535317	0.779588	-0.933058
i35	-0.848258	0.168922	-0.0300778	0.568988	0.140427	0.031786	-0.77273	0.0180134	0.510057	0.212873	-0.107098	0.340865	-1.15998	0.87939	0.0468274	0.0519933	0.247693	0.0225678	-0.533114	0.21086	0.0299433	0.241224	0.00280422	0.492038	-0.76601
i36	-0.947265	0.254536	0.151889	0.297034	0.243806	0.0432486	-0.748673	0.170402	0.391511	0.143511	0.114608	0.756728	-1.55154	0.0153474	0.664856	0.0408033	0.316527	0.00279406	-0.669437	0.309313	0.0517258	0.179195	0.186941	0.477719	-0.895581
i37 i37.w.1	-0.919032	0.225132	0.0626962	0.319586	0.311617	0.0674061	-0.91858	0.13465	0.599348	0.117176	0.0587504	0.42142	-3.74667	-0.107899	3.3744	0.0382956	0.239872	-0.0137978	-0.888444	0.624074	0.0234602	0.0294637	0.271104	0.392089	-0.716117
i40.11.a i40.11.b i40.11.f	-0.671824	0.192608	0.128744	0.0938128	0.256659	0.136641	-0.812165	0.298453	0.0881453	0.288926	0.0504774	0.164946	-0.620317	0.110617	0.294276	0.0956399	0.126669	0.287627	-0.799807	0.289871	0.118283	0.187694	0.345901	0.131037	-0.782915
i40.11.c	-0.503417	0.230394	0.0329281	0.0671728	0.172923	0.437647	-0.8397	0.12337	0.0940917	0.184592	0.309079	0.609616	-0.91783	0.111242	-0.112107	0.352328	0.259807	0.0621614	-0.643862	-0.0304343	0.416234	0.233908	-0.0287485	-0.0139667	-0.607426
i40.11.d	-0.501228	0.126396	0.0313493	0.0789766	0.264506	0.46994	-0.928895	0.124476	0.0246729	0.309806	0.24305	0.259564	-0.764757	0.15508	0.107063	0.444766	0.037372	0.112648	-0.724093	0.129308	0.462217	0.14561	0.0241314	0.0401236	-0.672083
i40.11.e i40.11.h	-0.400533	0.0901798	0.040679	0.0916574	0.178017	0.542297	-1.02754	0.0876209	0.0890834	0.308539	0.307999	0.110321	-1.15983	-0.193879	0.935391	0.52995	0.0856518	-0.148053	-1.10991	0.642357	0.226891	0.0653941	0.15746	0.141601	-0.591346
i40.11.g i40.11.i i40.11.j i40.11.k i40.11.l	-0.827513	0.100358	0.42231	0.10004	0.204806	0.122036	-0.90553	0.495735	0.0533419	0.234417	0.14259	0.137647	-0.593269	0.0768969	0.236135	0.141616	0.0620971	0.322398	-0.545751	0.0196394	0.127108	0.119641	0.434044	0.00861028	-0.689404
i40.12 i40.13	-0.63308	0.125394	0.283868	0.0459654	0.177853	0.312232	-0.840747	0.379666	0.0334552	0.115393	0.322252	0.173093	-0.75312	0.10303	0.154745	0.174041	0.0508726	0.343643	-0.631577	0.0630196	0.350856	0.0914214	0.268909	0.032834	-0.744021
i40.2	-0.743811	0.139266	0.204615	0.130444	0.269487	0.0575662	-0.812901	0.25195	0.196322	0.307063	0.0625731	0.186398	-0.78607	0.184466	0.352633	0.0893033	0.325153	0.412961	-1.0151	0.187685	0.0600051	0.165407	0.256758	0.0610432	-0.543213
i40.3	-0.706813	0.0828124	0.0566047	0.103416	0.46398	0.0618331	-0.650847	0.279756	0.1007	0.208557	0.0141682	0.0937815	-0.600894	0.133212	0.359733	0.0559239	0.072931	0.287799	-0.803198	0.386544	0.121775	0.0733089	0.377202	0.187606	-0.759892
i41	-0.750597	0.297735	0.0483	0.115211	0.28935	0.353758	-0.877084	0.0571512	0.20275	0.263425	0.30102	0.299776	-1.19506	0.486219	0.108049	0.203335	0.301164	0.13769	-0.823666	0.181478	0.343942	0.263537	0.0206079	0.122227	-0.750314
i45	-0.941249	0.223712	0.1129	0.520233	0.0844036	0.0412638	-0.704219	0.0203414	0.448505	0.194109	0.293805	0.286992	-1.41711	0.408707	0.427605	0.0602843	0.28177	0.0181992	-0.586224	0.22597	0.0211299	0.263452	0.041135	0.488182	-0.813899
i45.w	-0.911808	0.472153	-0.0290286	0.280129	0.188554	0.0470157	-0.472089	0.00466417	0.215847	0.204562	-0.107176	0.172936	-0.977781	0.36307	0.548951	0.152162	1.17743	0.0534155	-1.71169	0.328687	0.0515562	0.561705	0.0406543	0.165455	-0.81937
i50.a i50.b	-0.847182	0.536508	-0.00741231	0.113351	0.204735	0.0886646	-0.419031	0.010855	0.0798719	0.239639	-0.037489	0.332206	-0.734788	0.111985	0.328086	0.133829	0.570615	0.0261418	-1.01279	0.282201	0.0925671	0.655612	0.0293293	0.108068	-0.885576
i51	-0.874742	0.638438	0.0508611	-0.0289705	0.214413	0.0942133	-0.345868	0.0196524	0.011918	0.220084	0.359759	0.941993	-1.62271	0.174646	0.146314	-0.136645	0.380933	0.116458	-0.684301	0.323555	0.0913409	0.635346	0.008812	0.0292229	-0.764721
i52	-0.869195	0.734722	0.0249409	-0.00654153	0.116074	0.126461	-0.244662	0.0136933	0.0177431	0.0867642	0.303326	0.967542	-1.28541	0.0481394	-0.0335967	-0.0476892	0.75151	0.0288565	-0.642083	-0.0905947	0.176353	0.765867	-0.00419708	-0.0188804	-0.919143
i55	-0.852997	0.43678	-0.0290873	0.234187	0.211117	0.0779793	-0.514125	0.00947536	0.192554	0.234117	-0.112104	0.204549	-0.791691	0.04093	0.658317	0.0939817	0.432828	0.0042619	-0.708741	0.17767	0.0896462	0.556831	0.0725311	0.187993	-0.907002
i60.1 i60.2 i60.3	-1.04017	0.298503	0.394138	0.0365158	0.31101	0.103191	-0.610865	0.0904591	0.0375467	0.379668	0.515065	0.341958	-1.23345	-0.0676597	0.444086	0.210427	0.625893	-0.298358	-0.66122	0.123258	0.117234	0.413991	0.128095	0.00806259	-0.667383
i61.1	-0.937411	0.289425	0.0635574	-0.0164384	0.600867	0.22081	-0.929779	-0.00182926	0.0294572	0.681341	0.384483	-0.0145045	-0.96614	-0.232018	0.82818	-0.0703702	0.165286	-0.164187	-0.783002	0.852274	0.161307	0.239749	0.0367528	0.0534474	-0.491256
i61.2	-0.885355	0.225013	0.0557065	0.0101296	0.594506	0.297555	-0.962072	-0.0624125	-0.00778581	0.734715	0.193632	-0.164053	-0.987396	-0.148277	1.10609	0.0220828	-0.0128353	-0.0929954	-1.08994	1.17369	0.18119	0.169331	0.0969835	0.164085	-0.61159
i62	-1.01173	0.183022	0.288847	-0.0296878	0.569554	0.0893892	-0.826656	0.127336	0.0539285	0.556002	0.325497	0.293799	-1.29976	0.0974059	0.583062	-0.0781175	0.290542	0.227445	-0.595083	0.155214	0.120439	0.240728	0.109412	0.0124736	-0.483053
i63	-0.863938	0.2784	0.0700581	0.0545015	0.460978	0.100091	-0.680878	0.014003	0.00998053	0.556803	0.407212	0.22639	-1.1763	-0.1845	0.7272	0.258602	0.131719	-0.150611	-0.882963	0.643253	0.12256	0.41176	0.033263	0.0360436	-0.603626
i64	-0.806485	0.460652	0.000848318	-0.0241941	0.369179	0.275916	-0.646701	0.00607518	0.0339606	0.330749	0.020217	0.24172	-0.665954	-0.200043	0.60406	-0.137522	0.322281	-0.0477122	-0.903592	0.766546	0.207176	0.309883	0.0142241	0.0756795	-0.606963
i65 i66 i67	-0.959894	0.301371	0.020962	0.0952013	0.54236	0.0750963	-0.66411	0.00750465	0.0241035	0.557406	0.189897	0.272834	-1.04148	0.015036	0.563715	0.213977	0.217414	0.00373053	-1.07187	0.636746	0.0837244	0.345318	0.00960592	0.0437327	-0.482381
i70	-0.499978	0.0704702	0.0207958	0.134936	0.273775	0.461788	-0.890689	0.00513856	0.0933501	0.330413	0.688329	0.0259552	-1.51019	0.205531	0.590371	0.421008	0.0444468	0.0193741	-0.785475	0.300646	0.461968	0.085082	0.030097	0.162597	-0.739744
i71	-0.642752	0.152718	0.0457723	0.0627694	0.381492	0.340621	-0.887225	0.0645032	0.032645	0.449456	0.660662	0.417425	-1.61815	-0.449632	0.989698	0.375564	0.0875734	-0.186387	-0.75786	0.48111	0.319436	0.168735	0.0574149	0.0673297	-0.612916
i72	-0.925578	0.400312	0.0218278	0.0830391	0.420399	0.0714556	-0.57334	0.00344736	0.0387701	0.459667	0.218681	0.193486	-1.16544	-0.288862	1.04213	0.128979	0.337362	-0.0447843	-1.15819	0.736628	0.0720111	0.441106	0.017818	0.081236	-0.612171
i73	-0.915996	0.599706	0.0437536	0.059378	0.213159	0.115436	-0.555651	0.0151678	0.0633143	0.361733	0.188333	0.33918	-0.954736	-0.378989	0.806212	0.0629412	0.348664	-0.0933304	-1.14229	0.824013	0.0508685	0.448467	0.0446975	0.185511	-0.729544
i74	-0.938992	0.36258	0.0303446	0.140173	0.405894	0.0385382	-0.608013	0.0100202	0.0959744	0.46348	0.131936	0.409895	-1.25271	-0.249508	0.960391	0.0879331	0.566442	-0.0359988	-1.12492	0.50654	0.0403543	0.433532	0.0219605	0.0802793	-0.576126
i75	-0.895491	0.411319	0.0275784	0.087683	0.36891	0.119018	-0.551785	0.0248807	0.108736	0.299151	0.160532	0.500521	-1.07968	0.15469	0.263936	0.106123	0.454813	0.0321637	-0.953817	0.360717	0.169818	0.475904	0.0208722	0.137194	-0.803788
i80	-0.874794	0.680182	0.0468617	-0.0185422	0.166292	0.078106	-0.362897	0.0236439	0.0661118	0.195035	0.150843	0.662777	-1.31281	-0.0663264	0.565516	-0.0207173	0.643269	-0.0230225	-0.810286	0.210756	0.0646414	0.660226	0.0682932	0.0733241	-0.866485
i85	-0.968278	0.548573	0.0241094	0.0517505	0.343845	0.0543811	-0.461412	0.020415	0.152011	0.234605	0.0551875	0.471402	-1.10591	-0.115135	0.694456	0.0180406	0.534563	-0.0175344	-0.972144	0.437075	0.0702812	0.483727	0.0620107	0.256269	-0.872288
i90.1.a i90.1.b i90.1.c i90.1.d i90.1.e i90.1.f i90.1.g i90.3.a i90.3.b i90.3.c i90.4.a i90.4.b i90.5.a i90.5.b i90.6.a i90.6.b i90.6.c i90.6.d i90.6.e i90.6.f	-0.885312	0.306718	0.00466119	0.146685	0.427248	0.173914	-0.728856	-0.0126033	0.101761	0.465784	0.0190887	-0.0910263	-0.854272	-0.041638	0.967847	0.186428	0.228092	-0.0129221	-0.91387	0.512272	0.110697	0.212836	0.0612328	0.104432	-0.489198
i91	-1.00814	0.145869	0.107162	0.195367	0.559742	0.0212032	-0.633654	0.024212	0.0666398	0.521599	0.147749	0.229657	-1.07047	0.441556	0.251506	0.0831946	0.195227	0.136378	-0.666581	0.251782	0.0514994	0.330152	0.0167833	0.0543996	-0.452834
i92	-0.909243	0.254159	0.0488715	0.0597348	0.546478	0.0920999	-0.767729	0.0317676	0.135294	0.508567	0.185292	0.332378	-1.10082	0.134233	0.448915	0.0609625	0.381032	0.0361322	-1.07806	0.599936	0.113427	0.291299	0.0245758	0.122015	-0.551318
i93	-0.938048	0.364995	0.0654558	0.155033	0.352564	0.0864085	-0.636301	0.00484603	0.105942	0.439104	0.160898	0.0503176	-0.658991	-0.194544	0.642319	0.119167	0.343979	-0.0608342	-0.82521	0.422898	0.0803094	0.4225	0.0595219	0.125323	-0.687655
i95	-0.658594	0.288829	0.0752262	0.00144218	0.293096	0.179938	-0.650658	0.0154679	0.25222	0.203032	1.13402	0.374284	-2.72313	0.257711	0.957114	0.00227986	0.640008	0.0270252	-0.211453	-0.45786	0.244174	0.271502	0.0528933	-0.241287	-0.327282

## Sheet: dElast_0D
Industry	de_KK	de_KL	de_KE	de_KM	de_KS	de_LK	de_LL	de_LE	de_LM	de_LS	de_EK	de_EL	de_EE	de_EM	de_ES	de_MK	de_ML	de_ME	de_MM	de_MS	de_SK	de_SL	de_SE	de_SM	de_SS
i01.a i01.b i01.c i01.d i01.e i01.f i01.g i01.h i01.i i01.j i01.k i01.l i01.m i01.n i01.o i02 i05	0.0026272	0.00175318	0.00191982	0.00292626	0.00458486	0.00199385	0.00272703	0.00189151	0.00329172	0.004994	0.00557716	0.00482291	0.00770274	0.00777123	0.0129866	0.00148931	0.00147365	0.00135975	0.00328845	0.00403538	0.00318748	0.0030504	0.00310909	0.00550716	0.00777527
i10 i11.a i11.b i11.c i12 i13.1 i13.20.11 i13.20.12 i13.20.13 i13.20.14 i13.20.15 i13.20.16 i14.1 i14.2 i14.3	0.00526602	0.00270139	0.00269583	0.00243759	0.00659011	0.00182761	0.00264122	0.00098518	0.00152976	0.00351544	0.0101453	0.0054294	0.0145782	0.0054098	0.0191199	0.00263465	0.0024448	0.00155485	0.00332489	0.0048041	0.00439485	0.00344948	0.00338436	0.00297009	0.00746901
i15.a i15.b i15.c i15.d i15.e i15.f i15.g i15.h i15.i i15.j i15.k i16 i17 i18 i19 i20 i20.w i21.1 i21.w.1 i21.2 i22 i36 i37 i37.w.1	0.00264117	0.00219276	0.00292322	0.00388093	0.00586541	0.000569675	0.00182332	0.00148948	0.00237979	0.00333251	0.00487542	0.00959723	0.0163623	0.0160521	0.025121	0.000447966	0.00105527	0.0011179	0.00228238	0.00274522	0.00108963	0.00238066	0.0028009	0.00441636	0.00586989
i23.1 i23.2 i23.3 i24.1 i24.1.w i24.2 i24.3 i24.4 i25 i26.a i26.w.1 i26.b i26.c i26.d i26.d.w i26.e i27.a i27.a.w i27.41 i27.41.w i27.42 i27.42.w i27.43 i27.43.w i27.44 i27.44.w i27.45 i27.45.w i27.5 i28	0.00363873	0.00308691	0.00511187	0.00320759	0.00762573	0.000912449	0.00259408	0.00299867	0.00224749	0.00451599	0.00242809	0.00484265	0.00871304	0.00441533	0.0110007	0.000538008	0.0012663	0.00156058	0.00203576	0.00281751	0.00208501	0.00417798	0.00632527	0.00458212	0.0091077
i29 i30 i31 i32 i33 i34 i35	0.00321744	0.00221475	0.00206568	0.00384046	0.00569046	0.000463553	0.00142178	0.000346061	0.00191784	0.00233337	0.0083288	0.00662191	0.0116407	0.0115168	0.0194768	0.000379323	0.000902549	0.000284732	0.00210967	0.00222824	0.0012476	0.00243167	0.00105833	0.00491461	0.00574264
i40.11.a i40.11.b i40.11.c i40.11.d i40.11.e i40.11.f i40.11.g i40.11.h i40.11.i i40.11.j i40.11.k i40.11.l i40.12 i40.13 i40.2 i40.3	0.0049085	0.0029111	0.00392442	0.00262506	0.00730392	0.00408688	0.00323905	0.00374332	0.00246939	0.00675434	0.00346603	0.00236577	0.00525524	0.00233993	0.00689919	0.00620854	0.00415841	0.00628286	0.00584187	0.0112794	0.00806984	0.00531471	0.00865656	0.00527101	0.0140189
i41 i90.1.a i90.1.b i90.1.c i90.1.d i90.1.e i90.1.f i90.1.g i90.3.a i90.3.b i90.3.c i90.4.a i90.4.b i90.5.a i90.5.b i90.6.a i90.6.b i90.6.c i90.6.d i90.6.e i90.6.f	0.0045152	0.00267295	0.00154387	0.00388304	0.00664522	0.00196495	0.0021564	0.000955613	0.00220366	0.00370324	0.00763355	0.00641324	0.00979604	0.0109489	0.0177256	0.00556153	0.00428753	0.00317136	0.00980299	0.0124266	0.00252737	0.0019113	0.00136074	0.00330212	0.00482901
i45 i45.w	0.00334844	0.00186949	0.00298454	0.00486641	0.00656208	0.000338289	0.00111015	0.000336208	0.00112475	0.00146936	0.00777642	0.0047901	0.0130111	0.0122962	0.0197934	0.000557314	0.000708163	0.000547476	0.00219722	0.00229368	0.00164382	0.00200133	0.00190413	0.0049519	0.00591586
i50.a i50.b i51 i52	0.00208239	0.00227867	0.00150901	0.00176392	0.00370014	0.000355417	0.00137599	0.000241838	0.000390712	0.00120541	0.0113529	0.011723	0.019196	0.010231	0.0269171	0.00556739	0.00798237	0.00429584	0.00903502	0.013673	0.00207457	0.00448679	0.00199878	0.00241781	0.00590939
i55 i64 i70 i71 i72 i73 i74 i91 i92 i93 i95	0.0011743	0.000870494	0.00046021	0.00116123	0.00182512	0.000442996	0.000848167	0.000214075	0.000608176	0.0010223	0.00480038	0.00437642	0.00805325	0.0106471	0.0147498	0.00186283	0.00193531	0.00163552	0.00541414	0.00615764	0.000826183	0.000901685	0.0006428	0.00174443	0.00226032
i60.1 i60.2 i60.3 i61.1 i61.2 i62 i63	0.00524091	0.00381302	0.0044865	0.00229243	0.00810272	0.00147321	0.00270036	0.00164086	0.000829996	0.00351818	0.00901875	0.00849987	0.0130531	0.00587213	0.0187152	0.0128299	0.0120273	0.0164131	0.0149504	0.0282371	0.00241412	0.00269773	0.00278892	0.00150722	0.00482869
i65 i66 i67	0.00523398	0.00318289	0.0010805	0.00302936	0.00679385	0.000786317	0.0012274	0.000164456	0.000502281	0.0014591	0.00980407	0.00604362	0.0109319	0.0117537	0.0195635	0.00681289	0.00454673	0.00291616	0.0101598	0.0132724	0.00104187	0.000893833	0.000331899	0.000908153	0.0017871
i75 i80 i85	0.00208081	0.00163201	0.00108852	0.00204306	0.00316829	0.000242877	0.000650025	0.000169591	0.000369232	0.000712382	0.00410671	0.00397625	0.00586997	0.00714655	0.0107121	0.00155012	0.00175642	0.00143758	0.00388673	0.00466483	0.00108878	0.00153037	0.000980096	0.00212614	0.00303104

## Sheet: dElast_1D
Industry	de_KK	de_KL	de_KE	de_KM	de_KS	de_LK	de_LL	de_LE	de_LM	de_LS	de_EK	de_EL	de_EE	de_EM	de_ES	de_MK	de_ML	de_ME	de_MM	de_MS	de_SK	de_SL	de_SE	de_SM	de_SS
i01.a i01.b i01.c i01.d i01.e i01.f i01.g i01.h i01.i i01.j i01.k i01.l i01.m i01.n i01.o	0.00254007	0.00162476	0.00181573	0.00262857	0.00424127	0.00219131	0.00300066	0.00203289	0.0033126	0.00526392	0.00562181	0.00465834	0.00761074	0.00699544	0.0124461	0.00140245	0.00131227	0.0012073	0.00297578	0.00363469	0.00307573	0.00282731	0.00291417	0.00493404	0.00719324
i02	0.00807218	0.00523635	0.00576684	0.0064516	0.0123412	0.00218572	0.00386489	0.0019539	0.00320738	0.00559056	0.0125915	0.010139	0.0161853	0.0120741	0.0254126	0.00235919	0.0028255	0.00204593	0.00451771	0.00585742	0.00564322	0.00608089	0.0053404	0.00724706	0.012281
i05	0.0128447	0.00652266	0.0125396	0.00853612	0.0207962	0.00428283	0.00441659	0.00527964	0.00409778	0.00894713	0.016086	0.0103114	0.024748	0.0133848	0.0335859	0.00436512	0.00319198	0.00530352	0.00645558	0.0098217	0.00922762	0.00604011	0.011635	0.00850615	0.0181451
i10 i11.a i11.b i11.c i12	0.00849844	0.00407761	0.00811131	0.0110653	0.0164577	0.0027218	0.00422467	0.00331435	0.00544832	0.00791435	0.0168887	0.0102865	0.0299989	0.0286009	0.0458224	0.0131207	0.00961475	0.0162795	0.0324556	0.0396101	0.00784866	0.0056148	0.0105002	0.0159333	0.0214649
i13.1 i13.20.11 i13.20.12 i13.20.13 i13.20.14 i13.20.15 i13.20.16 i14.1 i14.2 i14.3	0.00550762	0.00295639	0.00251351	0.00255827	0.00679098	0.00167395	0.00269997	0.000777567	0.0015856	0.00346194	0.00843713	0.00462465	0.0121839	0.00438258	0.0156125	0.00215122	0.00235212	0.00108529	0.00324278	0.00432842	0.00413609	0.00371732	0.00282458	0.00315507	0.00729075
i15.a i15.b i15.c i15.d i15.e i15.f i15.g i15.h i15.i i15.j i15.k i16	0.00303174	0.00255179	0.0030554	0.00417004	0.00638428	0.000842386	0.00239302	0.00168349	0.00312162	0.00406995	0.00571898	0.00957665	0.0161718	0.0170642	0.025794	0.000356933	0.000791343	0.000789615	0.00187122	0.00214992	0.00103306	0.00199409	0.00222759	0.00404353	0.00515373
i17 i18 i19	0.00559031	0.00497272	0.00764166	0.00687456	0.0126183	0.000997322	0.00389764	0.00283727	0.00316358	0.00572917	0.0082615	0.0154678	0.029564	0.0196199	0.0391715	0.00106107	0.00242972	0.00280708	0.00362047	0.00519524	0.0025049	0.00566371	0.00719114	0.00667195	0.0116114
i20 i20.w	0.00408265	0.00266489	0.00471831	0.00491893	0.008232	0.000540781	0.00192055	0.00255167	0.00239267	0.0039483	0.00390137	0.0103141	0.0248732	0.0181019	0.0322683	0.000520817	0.00124927	0.00235505	0.0031303	0.00407803	0.00159443	0.00376156	0.00767083	0.00742607	0.0114378
i21.1 i21.w.1 i21.2 i22	0.00295734	0.00177856	0.00215154	0.00295845	0.00492315	0.000465029	0.00135994	0.000439626	0.00133679	0.001895	0.00778446	0.00607012	0.0115749	0.0106598	0.0184703	0.000558828	0.000961544	0.000558642	0.00198928	0.00225853	0.00125523	0.00184408	0.00130082	0.0030452	0.00402458
i23.1 i23.2 i23.3	0.016729	0.00578227	0.0170594	0.00782835	0.0256997	0.00447742	0.00505818	0.00978125	0.00458488	0.0124193	0.00126961	0.000931098	0.00383143	0.00117432	0.00413407	0.00517817	0.00391689	0.0105735	0.00798581	0.0142525	0.00562035	0.00350797	0.0121759	0.00470249	0.0146551
i24.1 i24.1.w i24.2 i24.3 i24.4	0.00366925	0.0025751	0.00333104	0.00358814	0.00647112	0.00095459	0.00243132	0.00156092	0.00185401	0.00326297	0.00418513	0.00535349	0.0104795	0.0082119	0.0146588	0.00141994	0.00197802	0.00259054	0.00408014	0.00527412	0.00214902	0.00292342	0.00388034	0.00442389	0.00694425
i25 i26.a i26.w.1 i26.b i26.c i26.d i26.d.w i26.e	0.00363126	0.00227216	0.00335286	0.00245613	0.00587299	0.000588969	0.00139563	0.000870704	0.00133728	0.00213182	0.00616391	0.00616253	0.0114319	0.00580215	0.0153804	0.000341214	0.000716157	0.000441895	0.0012011	0.00143321	0.00165089	0.00230539	0.00235058	0.00287793	0.00468521
i27.a i27.a.w i27.41 i27.41.w i27.42 i27.42.w i27.43 i27.43.w i27.44 i27.44.w i27.45 i27.45.w i27.5	0.00721681	0.00449272	0.00817612	0.00484242	0.0126324	0.00149901	0.0028894	0.00271368	0.0030521	0.00498299	0.00757682	0.00753705	0.0144945	0.0071451	0.0192366	0.000463694	0.000863318	0.000738959	0.00206578	0.0022249	0.00248287	0.00293812	0.0040799	0.00464524	0.00738884
i28	0.00314852	0.00218534	0.00208203	0.00298284	0.00518311	0.000368338	0.00132254	0.000290519	0.00148106	0.00189294	0.00665237	0.00550239	0.00985676	0.00711824	0.0147838	0.0003289	0.000963892	0.000245871	0.00174447	0.00190862	0.00138715	0.00300202	0.00123839	0.00461611	0.00581705
i29	0.00323093	0.00251699	0.00190151	0.00427937	0.00605955	0.000450289	0.00163324	0.00029868	0.00198454	0.0025308	0.00722377	0.00627101	0.0103119	0.0102391	0.0174156	0.000438804	0.00112821	0.000279203	0.00228082	0.00253633	0.00131433	0.00304421	0.000991305	0.00533455	0.00636824
i30 i31 i32 i33	0.00415083	0.00276395	0.00250609	0.00414195	0.00670671	0.000591328	0.00159556	0.000423494	0.00190878	0.00244137	0.0110385	0.00862411	0.0159006	0.0129291	0.024759	0.000534954	0.00115869	0.000383039	0.00249897	0.00263768	0.00147407	0.00248587	0.0012353	0.0044426	0.00547487
i34 i35	0.00551912	0.00262653	0.00383454	0.00612314	0.00934446	0.00060745	0.00169076	0.000492359	0.00244616	0.00286086	0.0134125	0.00744362	0.0175621	0.0180707	0.0293632	0.000485297	0.000822951	0.000411486	0.00230635	0.00242213	0.00219239	0.00289904	0.00196828	0.00714804	0.0082698
i36 i37 i37.w.1	0.00467277	0.00256478	0.0062256	0.00566476	0.0098592	0.000449062	0.00246648	0.00303404	0.00249033	0.00456484	0.00506406	0.0143117	0.0354262	0.0234159	0.0445489	0.000739868	0.00186646	0.00377156	0.00498241	0.0064544	0.00146223	0.00385725	0.00811417	0.0073349	0.0117587
i40.11.a i40.11.b i40.11.c i40.11.d i40.11.e i40.11.f i40.11.g i40.11.h i40.11.i i40.11.j i40.11.k i40.11.l i40.12 i40.13	0.00439726	0.00248609	0.00368545	0.00214714	0.00651477	0.00438768	0.00337892	0.00420238	0.00238738	0.00719457	0.00390505	0.00252836	0.00574736	0.00231409	0.00752053	0.00649123	0.00409126	0.0066281	0.00579691	0.0115499	0.00953343	0.00596968	0.0104259	0.00559323	0.0163356
i40.2 i40.3	0.0135694	0.00933851	0.0121658	0.00937757	0.0221834	0.00418993	0.00481098	0.00478319	0.00354948	0.00857483	0.00362564	0.00320534	0.00674211	0.00295705	0.00830333	0.00610885	0.00515478	0.00642877	0.00728122	0.012435	0.00623789	0.00536512	0.00779075	0.00535763	0.0125837
i41	0.00602147	0.00311063	0.00139173	0.00437732	0.00803735	0.00367237	0.00338864	0.00119287	0.00332189	0.00601402	0.00870411	0.00630868	0.0108724	0.0110663	0.0184372	0.00772735	0.00495346	0.00311822	0.0102016	0.0139724	0.00955299	0.00602388	0.00351612	0.00940987	0.0151439
i45 i45.w	0.00334844	0.00186949	0.00298454	0.00486641	0.00656208	0.000338289	0.00111015	0.000336208	0.00112475	0.00146936	0.00777642	0.0047901	0.0130111	0.0122962	0.0197934	0.000557314	0.000708163	0.000547476	0.00219722	0.00229368	0.00164382	0.00200133	0.00190413	0.0049519	0.00591586
i50.a i50.b	0.00366189	0.00316166	0.00220374	0.00309253	0.00589219	0.000516656	0.00196743	0.000329868	0.000895659	0.00186348	0.0111461	0.0101242	0.0180577	0.00867447	0.0249633	0.0036753	0.00666362	0.00202586	0.00875696	0.0110224	0.00266982	0.00527917	0.00223141	0.00421235	0.00772481
i51 i52	0.00184454	0.00213675	0.00113134	0.00120427	0.00309276	0.000323753	0.00120588	0.000197444	0.0002314	0.00102168	0.00983462	0.011424	0.0172899	0.010154	0.0245766	0.00687144	0.00867021	0.00668042	0.00940021	0.0157751	0.00189664	0.00428752	0.00172796	0.00168514	0.00530797
i55	0.00318566	0.00249163	0.00198722	0.00310536	0.00521298	0.000440929	0.00169173	0.000276492	0.00111873	0.00168301	0.00766351	0.00599054	0.00977077	0.00811529	0.0158884	0.00124794	0.00255381	0.000844961	0.00412984	0.00490202	0.00221404	0.00403482	0.0017424	0.00518606	0.00720557
i60.1 i60.2 i60.3	0.00614039	0.00437311	0.00581304	0.0023463	0.00970445	0.00150865	0.00237499	0.00187899	0.000726469	0.00339304	0.00764621	0.00713376	0.0114544	0.00396033	0.0157645	0.0135344	0.0122564	0.0174775	0.0144886	0.0289723	0.00365645	0.00370035	0.00454053	0.00189499	0.00717885
i61.1 i61.2	0.00614848	0.00350798	0.00299373	0.00323405	0.00809839	0.00278301	0.00349234	0.00144897	0.00196952	0.00494566	0.0179095	0.0107589	0.0195764	0.0114683	0.0307897	0.0139782	0.0105909	0.00829498	0.0143465	0.0241622	0.00224677	0.00170193	0.00144289	0.0015608	0.00368796
i62	0.00967069	0.00345238	0.00712963	0.00652639	0.0139789	0.00167873	0.00228385	0.00179745	0.00155894	0.00358704	0.00803363	0.00417867	0.0108394	0.00711087	0.0156025	0.0171736	0.00843352	0.0166101	0.0231783	0.0343042	0.00294541	0.0015309	0.0029192	0.00275659	0.00524256
i63	0.00478696	0.0031732	0.00199363	0.00195523	0.00621522	0.00113294	0.00221529	0.000513657	0.000517683	0.00234646	0.0116018	0.0083159	0.0142802	0.010865	0.0228058	0.00929207	0.00683969	0.00887211	0.0132625	0.0196254	0.00163934	0.00168179	0.00104061	0.00109555	0.00291915
i64	0.00397002	0.0022605	0.000334336	0.00153545	0.00467017	0.00133069	0.00157152	0.000168691	0.00083647	0.00208229	0.00796793	0.00672905	0.0109922	0.00981699	0.0180345	0.00873219	0.00797034	0.00234194	0.0135787	0.0181059	0.00261573	0.00195586	0.000423776	0.00177992	0.00382242
i65 i66 i67	0.00523398	0.00318289	0.0010805	0.00302936	0.00679385	0.000786317	0.0012274	0.000164456	0.000502281	0.0014591	0.00980407	0.00604362	0.0109319	0.0117537	0.0195635	0.00681289	0.00454673	0.00291616	0.0101598	0.0132724	0.00104187	0.000893833	0.000331899	0.000908153	0.0017871
i70 i71 i72 i73 i74	0.00143562	0.000961723	0.000371938	0.00109264	0.00192941	0.000668889	0.00108571	0.000282925	0.000799198	0.00142174	0.00590613	0.00632868	0.0116865	0.0151843	0.0209304	0.00234176	0.00244983	0.002049	0.00703233	0.00796772	0.00100916	0.00105751	0.000697712	0.00197179	0.00258996
i75 i80 i85	0.00208081	0.00163201	0.00108852	0.00204306	0.00316829	0.000242877	0.000650025	0.000169591	0.000369232	0.000712382	0.00410671	0.00397625	0.00586997	0.00714655	0.0107121	0.00155012	0.00175642	0.00143758	0.00388673	0.00466483	0.00108878	0.00153037	0.000980096	0.00212614	0.00303104
i90.1.a i90.1.b i90.1.c i90.1.d i90.1.e i90.1.f i90.1.g i90.3.a i90.3.b i90.3.c i90.4.a i90.4.b i90.5.a i90.5.b i90.6.a i90.6.b i90.6.c i90.6.d i90.6.e i90.6.f	0.00412735	0.00262527	0.00217011	0.00414234	0.00667228	0.00148091	0.00241423	0.00103772	0.00222879	0.00366251	0.00888719	0.00749628	0.0118476	0.0120768	0.020555	0.00526542	0.00500083	0.00374793	0.0106842	0.0134014	0.00172304	0.00166193	0.00129559	0.00272834	0.00390179
i91 i92 i93 i95	0.00202116	0.00173997	0.00122278	0.00274778	0.00392085	0.000381618	0.00112338	0.00031715	0.000834579	0.00138174	0.00326521	0.00387772	0.00595433	0.00742661	0.0105803	0.00204236	0.00282859	0.00207176	0.00624861	0.00737217	0.000662206	0.00104885	0.00067457	0.00168266	0.00223267

## Sheet: dElast_2D
Industry	de_KK	de_KL	de_KE	de_KM	de_KS	de_LK	de_LL	de_LE	de_LM	de_LS	de_EK	de_EL	de_EE	de_EM	de_ES	de_MK	de_ML	de_ME	de_MM	de_MS	de_SK	de_SL	de_SE	de_SM	de_SS
i01.a i01.b i01.c i01.d i01.e i01.f i01.g i01.h	0.00339955	0.0022001	0.00210134	0.00286802	0.00526279	0.00269533	0.00357738	0.00211137	0.00315184	0.00573365	0.00541018	0.00444309	0.00724139	0.00582202	0.0114366	0.00237252	0.00213522	0.00187132	0.0036735	0.00513638	0.00364656	0.00324935	0.00307989	0.00430631	0.007313
i01.i i01.j i01.k i01.l i01.m i01.n i01.o	0.00277146	0.00162998	0.00201087	0.0029226	0.00454602	0.00243887	0.0032049	0.00238098	0.00361833	0.00574941	0.00730935	0.00576411	0.00989134	0.00795647	0.0154238	0.00107698	0.000894993	0.000810476	0.00257072	0.00282357	0.00329309	0.00278121	0.00307979	0.0055153	0.00771162
i02	0.00807218	0.00523635	0.00576684	0.0064516	0.0123412	0.00218572	0.00386489	0.0019539	0.00320738	0.00559056	0.0125915	0.010139	0.0161853	0.0120741	0.0254126	0.00235919	0.0028255	0.00204593	0.00451771	0.00585742	0.00564322	0.00608089	0.0053404	0.00724706	0.012281
i05	0.0128447	0.00652266	0.0125396	0.00853612	0.0207962	0.00428283	0.00441659	0.00527964	0.00409778	0.00894713	0.016086	0.0103114	0.024748	0.0133848	0.0335859	0.00436512	0.00319198	0.00530352	0.00645558	0.0098217	0.00922762	0.00604011	0.011635	0.00850615	0.0181451
i10 i11.a i11.b i11.c i12	0.00849844	0.00407761	0.00811131	0.0110653	0.0164577	0.0027218	0.00422467	0.00331435	0.00544832	0.00791435	0.0168887	0.0102865	0.0299989	0.0286009	0.0458224	0.0131207	0.00961475	0.0162795	0.0324556	0.0396101	0.00784866	0.0056148	0.0105002	0.0159333	0.0214649
i13.1 i13.20.11 i13.20.12 i13.20.13 i13.20.14 i13.20.15 i13.20.16	0.00946029	0.0048547	0.00781987	0.00553922	0.0136401	0.00423819	0.010089	0.0050015	0.00608948	0.0131685	0.0342043	0.0247364	0.0612851	0.0300774	0.0801044	0.00608025	0.0076039	0.00755023	0.0105759	0.0157246	0.00655977	0.0072165	0.00886181	0.00691698	0.0151317
i14.1 i14.2 i14.3	0.00577485	0.0033441	0.00347969	0.003014	0.00794397	0.00136278	0.00238208	0.000686159	0.00120091	0.00287837	0.00872306	0.00432453	0.0125462	0.00469386	0.0161054	0.00214563	0.00213431	0.00131436	0.00292374	0.00403446	0.00410809	0.00364379	0.00330548	0.00292151	0.00714459
i15.a i15.b i15.c i15.d i15.e i15.f i15.g i15.h i15.i i15.j i15.k	0.0031371	0.00258526	0.00312162	0.00421567	0.00644283	0.000808531	0.00242781	0.00170076	0.00316934	0.00410433	0.00546645	0.0095477	0.0160847	0.0168915	0.0255531	0.000335132	0.000789811	0.000780424	0.00185259	0.00212281	0.000999778	0.00203575	0.00226379	0.00410213	0.00522544
i16	0.00897631	0.00676419	0.00229419	0.00694982	0.0130719	0.00604585	0.00821776	0.00190125	0.00609197	0.0119372	0.0213391	0.0197031	0.0209701	0.017836	0.0399384	0.0037856	0.00374019	0.00105655	0.00593369	0.00793317	0.00485567	0.00493802	0.00159047	0.00534489	0.00893189
i17 i18	0.00558789	0.00489781	0.00771972	0.0067329	0.0125645	0.00102326	0.00390242	0.0028984	0.00318531	0.00577581	0.00832218	0.0151209	0.0292639	0.0194587	0.0387805	0.00113725	0.00257027	0.00305406	0.00386031	0.0055721	0.00267142	0.00587177	0.00764854	0.00700657	0.0122265
i19	0.00706411	0.00561025	0.00689085	0.00744302	0.0133639	0.000867687	0.00278898	0.00126113	0.00278685	0.00406672	0.013575	0.0160634	0.0268666	0.0204894	0.0396077	0.000681539	0.00164987	0.000957555	0.00324804	0.00368145	0.0014384	0.00282922	0.00215722	0.0043254	0.00589568
i20 i20.w	0.00408265	0.00266489	0.00471831	0.00491893	0.008232	0.000540781	0.00192055	0.00255167	0.00239267	0.0039483	0.00390137	0.0103141	0.0248732	0.0181019	0.0322683	0.000520817	0.00124927	0.00235505	0.0031303	0.00407803	0.00159443	0.00376156	0.00767083	0.00742607	0.0114378
i21.1 i21.w.1 i21.2	0.00467416	0.00276333	0.00342612	0.00418084	0.00755911	0.00105057	0.0017825	0.000993112	0.00178962	0.00275416	0.00846271	0.00641722	0.0123061	0.00997119	0.0187564	0.000645556	0.00071597	0.000630306	0.00139318	0.00172978	0.00267981	0.00257035	0.00269616	0.00396356	0.00609305
i22	0.00418135	0.00230716	0.00196949	0.00403016	0.0064551	0.000465849	0.00123314	0.000249538	0.00125635	0.00174236	0.010672	0.00665587	0.0119051	0.0117377	0.0208438	0.000900015	0.00140386	0.000483357	0.00311781	0.00343913	0.00134843	0.00179648	0.000804357	0.00321497	0.0040439
i23.1 i23.2 i23.3	0.016729	0.00578227	0.0170594	0.00782835	0.0256997	0.00447742	0.00505818	0.00978125	0.00458488	0.0124193	0.00126961	0.000931098	0.00383143	0.00117432	0.00413407	0.00517817	0.00391689	0.0105735	0.00798581	0.0142525	0.00562035	0.00350797	0.0121759	0.00470249	0.0146551
i24.1 i24.1.w i24.2 i24.3 i24.4	0.00366925	0.0025751	0.00333104	0.00358814	0.00647112	0.00095459	0.00243132	0.00156092	0.00185401	0.00326297	0.00418513	0.00535349	0.0104795	0.0082119	0.0146588	0.00141994	0.00197802	0.00259054	0.00408014	0.00527412	0.00214902	0.00292342	0.00388034	0.00442389	0.00694425
i25	0.00438458	0.002715	0.00334711	0.00252461	0.00654264	0.000637279	0.00142872	0.00067719	0.001325	0.00203617	0.008746	0.00753206	0.0132477	0.00640278	0.0184849	0.000263582	0.000584784	0.000257259	0.000999611	0.00111329	0.00203903	0.00269948	0.00220262	0.00328356	0.00521571
i26.a i26.w.1 i26.b i26.c i26.d i26.d.w i26.e	0.00400095	0.00269274	0.00402793	0.00274971	0.00674043	0.000783745	0.00170932	0.00136441	0.00162086	0.00278889	0.00582344	0.00676424	0.0119855	0.00612085	0.016029	0.000564105	0.00114957	0.000875138	0.00196249	0.00243402	0.00172925	0.00245275	0.0028431	0.00302227	0.00513818
i27.a i27.a.w	0.00924328	0.00545467	0.0107228	0.00566276	0.0161239	0.00222093	0.00336007	0.00402241	0.00292994	0.00623566	0.00983761	0.00907478	0.0183226	0.00819413	0.0240113	0.000849652	0.00106505	0.00133943	0.00227791	0.00284472	0.00536326	0.00509508	0.00870459	0.00631239	0.0130708
i27.41 i27.41.w i27.42 i27.42.w i27.43 i27.43.w i27.44 i27.44.w i27.45 i27.45.w i27.5	0.00803964	0.00512691	0.00868182	0.00532882	0.0137809	0.00135143	0.00290771	0.00241202	0.00310518	0.00475762	0.0078374	0.00824948	0.0153954	0.00771835	0.0204317	0.000331473	0.000719297	0.000533604	0.00194224	0.00189841	0.00194309	0.00254333	0.00318838	0.00439985	0.00643795
i28	0.00314852	0.00218534	0.00208203	0.00298284	0.00518311	0.000368338	0.00132254	0.000290519	0.00148106	0.00189294	0.00665237	0.00550239	0.00985676	0.00711824	0.0147838	0.0003289	0.000963892	0.000245871	0.00174447	0.00190862	0.00138715	0.00300202	0.00123839	0.00461611	0.00581705
i29	0.00323093	0.00251699	0.00190151	0.00427937	0.00605955	0.000450289	0.00163324	0.00029868	0.00198454	0.0025308	0.00722377	0.00627101	0.0103119	0.0102391	0.0174156	0.000438804	0.00112821	0.000279203	0.00228082	0.00253633	0.00131433	0.00304421	0.000991305	0.00533455	0.00636824
i30 i32 i33	0.00564438	0.0030967	0.00198208	0.00412316	0.00766971	0.000660302	0.00171121	0.000258766	0.00180946	0.00241274	0.0119805	0.00725424	0.0135823	0.00987641	0.0218933	0.000610153	0.00126617	0.000243259	0.00268037	0.00274481	0.00157593	0.00230371	0.00074249	0.00378215	0.00481237
i31	0.00392339	0.00248154	0.00325666	0.00475423	0.00718469	0.000515303	0.0015092	0.000510431	0.00184675	0.00230305	0.00985729	0.00743666	0.0172706	0.0147101	0.0254802	0.000533457	0.000988662	0.000549949	0.00219683	0.00239819	0.00178353	0.00273106	0.00209102	0.00525026	0.00653544
i34 i35	0.00551912	0.00262653	0.00383454	0.00612314	0.00934446	0.00060745	0.00169076	0.000492359	0.00244616	0.00286086	0.0134125	0.00744362	0.0175621	0.0180707	0.0293632	0.000485297	0.000822951	0.000411486	0.00230635	0.00242213	0.00219239	0.00289904	0.00196828	0.00714804	0.0082698
i36 i37 i37.w.1	0.00467277	0.00256478	0.0062256	0.00566476	0.0098592	0.000449062	0.00246648	0.00303404	0.00249033	0.00456484	0.00506406	0.0143117	0.0354262	0.0234159	0.0445489	0.000739868	0.00186646	0.00377156	0.00498241	0.0064544	0.00146223	0.00385725	0.00811417	0.0073349	0.0117587
i40.11.a i40.11.b i40.11.f	0.00533315	0.0046847	0.00565538	0.00372805	0.00966434	0.00332091	0.00495262	0.00470019	0.00288459	0.00792108	0.00221711	0.00260026	0.00490248	0.00212844	0.00607431	0.00379883	0.00414409	0.00552599	0.00528207	0.0093668	0.00444987	0.00514004	0.00712181	0.00423219	0.0107508
i40.11.c i40.11.d i40.11.g i40.11.i i40.11.j i40.11.k i40.11.l	0.00418442	0.00237268	0.00439568	0.00199499	0.00671809	0.00494935	0.00399532	0.00585181	0.00273597	0.0088934	0.00873576	0.0055988	0.0146905	0.00469392	0.0183808	0.00741486	0.00486668	0.00878759	0.00772959	0.0145615	0.0127476	0.00810823	0.0176551	0.00746947	0.0244061
i40.11.e i40.11.h	0.00509105	0.00134345	0.0025255	0.0020781	0.00603353	0.00809924	0.00409449	0.00544465	0.00559493	0.0117558	0.0191366	0.00685958	0.0216246	0.0149352	0.0331386	0.0120516	0.00538076	0.0114023	0.0177424	0.0247474	0.00769749	0.00249255	0.00556998	0.00545367	0.0113775
i40.12 i40.13	0.00508114	0.00178627	0.00345513	0.00225088	0.00655385	0.00444859	0.00305218	0.00410354	0.00271662	0.00702748	0.00398148	0.00190601	0.00558364	0.00231573	0.00687159	0.0085305	0.00413231	0.00772331	0.00799639	0.0144089	0.0129341	0.00556834	0.0119308	0.00750699	0.0199319
i40.2 i40.3	0.0135694	0.00933851	0.0121658	0.00937757	0.0221834	0.00418993	0.00481098	0.00478319	0.00354948	0.00857483	0.00362564	0.00320534	0.00674211	0.00295705	0.00830333	0.00610885	0.00515478	0.00642877	0.00728122	0.012435	0.00623789	0.00536512	0.00779075	0.00535763	0.0125837
i41	0.00602147	0.00311063	0.00139173	0.00437732	0.00803735	0.00367237	0.00338864	0.00119287	0.00332189	0.00601402	0.00870411	0.00630868	0.0108724	0.0110663	0.0184372	0.00772735	0.00495346	0.00311822	0.0102016	0.0139724	0.00955299	0.00602388	0.00351612	0.00940987	0.0151439
i45 i45.w	0.00334844	0.00186949	0.00298454	0.00486641	0.00656208	0.000338289	0.00111015	0.000336208	0.00112475	0.00146936	0.00777642	0.0047901	0.0130111	0.0122962	0.0197934	0.000557314	0.000708163	0.000547476	0.00219722	0.00229368	0.00164382	0.00200133	0.00190413	0.0049519	0.00591586
i50.a i50.b	0.00366189	0.00316166	0.00220374	0.00309253	0.00589219	0.000516656	0.00196743	0.000329868	0.000895659	0.00186348	0.0111461	0.0101242	0.0180577	0.00867447	0.0249633	0.0036753	0.00666362	0.00202586	0.00875696	0.0110224	0.00266982	0.00527917	0.00223141	0.00421235	0.00772481
i51 i52	0.00184454	0.00213675	0.00113134	0.00120427	0.00309276	0.000323753	0.00120588	0.000197444	0.0002314	0.00102168	0.00983462	0.011424	0.0172899	0.010154	0.0245766	0.00687144	0.00867021	0.00668042	0.00940021	0.0157751	0.00189664	0.00428752	0.00172796	0.00168514	0.00530797
i55	0.00318566	0.00249163	0.00198722	0.00310536	0.00521298	0.000440929	0.00169173	0.000276492	0.00111873	0.00168301	0.00766351	0.00599054	0.00977077	0.00811529	0.0158884	0.00124794	0.00255381	0.000844961	0.00412984	0.00490202	0.00221404	0.00403482	0.0017424	0.00518606	0.00720557
i60.1 i60.2 i60.3	0.00614039	0.00437311	0.00581304	0.0023463	0.00970445	0.00150865	0.00237499	0.00187899	0.000726469	0.00339304	0.00764621	0.00713376	0.0114544	0.00396033	0.0157645	0.0135344	0.0122564	0.0174775	0.0144886	0.0289723	0.00365645	0.00370035	0.00454053	0.00189499	0.00717885
i61.1 i61.2	0.00614848	0.00350798	0.00299373	0.00323405	0.00809839	0.00278301	0.00349234	0.00144897	0.00196952	0.00494566	0.0179095	0.0107589	0.0195764	0.0114683	0.0307897	0.0139782	0.0105909	0.00829498	0.0143465	0.0241622	0.00224677	0.00170193	0.00144289	0.0015608	0.00368796
i62	0.00967069	0.00345238	0.00712963	0.00652639	0.0139789	0.00167873	0.00228385	0.00179745	0.00155894	0.00358704	0.00803363	0.00417867	0.0108394	0.00711087	0.0156025	0.0171736	0.00843352	0.0166101	0.0231783	0.0343042	0.00294541	0.0015309	0.0029192	0.00275659	0.00524256
i63	0.00478696	0.0031732	0.00199363	0.00195523	0.00621522	0.00113294	0.00221529	0.000513657	0.000517683	0.00234646	0.0116018	0.0083159	0.0142802	0.010865	0.0228058	0.00929207	0.00683969	0.00887211	0.0132625	0.0196254	0.00163934	0.00168179	0.00104061	0.00109555	0.00291915
i64	0.00397002	0.0022605	0.000334336	0.00153545	0.00467017	0.00133069	0.00157152	0.000168691	0.00083647	0.00208229	0.00796793	0.00672905	0.0109922	0.00981699	0.0180345	0.00873219	0.00797034	0.00234194	0.0135787	0.0181059	0.00261573	0.00195586	0.000423776	0.00177992	0.00382242
i65	0.00671062	0.00455755	0.000863372	0.00308303	0.00856746	0.00118511	0.00164886	0.000172133	0.000594803	0.00203979	0.0106309	0.00809484	0.0106098	0.012884	0.0212596	0.00908237	0.00669706	0.00308344	0.0121748	0.0167578	0.00169804	0.00154592	0.000343267	0.00112889	0.002668
i66	0.00552878	0.00314051	0.00214456	0.00320149	0.00736782	0.00072543	0.00198062	0.000288635	0.000462724	0.00204762	0.0116959	0.00682999	0.0181616	0.0161184	0.026824	0.00480807	0.00301532	0.00421198	0.00830661	0.0108281	0.000673558	0.000755328	0.000458675	0.000667885	0.00153808
i67	0.00465511	0.00307341	0.000942466	0.00294836	0.00610235	0.000650376	0.00203215	0.000138099	0.000524319	0.0020119	0.00834008	0.00563279	0.0112247	0.00779654	0.0168166	0.00614263	0.00502256	0.00183549	0.00852751	0.0117621	0.000784003	0.00117534	0.000247505	0.000734222	0.00183952
i70	0.00149289	0.000306515	0.000277183	0.000885278	0.00144649	0.00203874	0.00179588	0.00120536	0.00288251	0.0039174	0.00946253	0.00608895	0.0185833	0.0164292	0.0266355	0.00287099	0.00137452	0.00154772	0.00576488	0.00647758	0.00245904	0.00100819	0.00135423	0.00349173	0.00464798
i71 i72 i73 i74	0.00177038	0.00149348	0.000741639	0.00210149	0.00309543	0.000304347	0.00105033	0.000149783	0.000499025	0.00107441	0.00519777	0.0051019	0.00961237	0.0110882	0.0163049	0.0026015	0.00305295	0.00195779	0.00815765	0.0091601	0.000569805	0.000955683	0.000427836	0.00136583	0.0018906
i75	0.00292622	0.00197254	0.000831841	0.0022249	0.00389389	0.0005374	0.00100176	0.000184084	0.000539547	0.00113094	0.0048395	0.00375807	0.00654583	0.00861148	0.0123015	0.00269008	0.00231576	0.00179043	0.00616407	0.00720416	0.00177304	0.00181237	0.000972489	0.00273625	0.00388044
i80	0.00386119	0.00290193	0.00190234	0.00291553	0.00558233	0.000308918	0.000769679	0.000186087	0.000306543	0.000688481	0.00612562	0.00537098	0.00820349	0.00837428	0.0139628	0.00325745	0.00306228	0.00290656	0.00590463	0.00783958	0.00216906	0.00247693	0.00168326	0.0027279	0.00463469
i85	0.00237711	0.00224644	0.00179226	0.00292381	0.00453161	0.000214997	0.000902118	0.000236509	0.000660807	0.00103406	0.00410341	0.00553081	0.00693348	0.00781309	0.012333	0.00101932	0.00241499	0.00118964	0.00420243	0.00487631	0.000924064	0.00214956	0.0010958	0.00284539	0.00386974
i90.1.a i90.1.b i90.1.c i90.1.d i90.1.e i90.1.f i90.1.g	0.00411248	0.0026956	0.00240554	0.00445613	0.00696593	0.00156988	0.00253198	0.001251	0.00270638	0.00415434	0.00995455	0.00883566	0.0132506	0.0146321	0.0238563	0.00563515	0.00584059	0.0044708	0.0127597	0.0157359	0.00177394	0.00180102	0.00146625	0.00317517	0.00435674
i90.3.a i90.3.b i90.3.c	0.00563994	0.00405328	0.00256696	0.00510153	0.00890681	0.00238744	0.00428112	0.0015207	0.00311012	0.00594401	0.0223315	0.0224698	0.0271443	0.0301691	0.0515324	0.00638651	0.00660323	0.00434363	0.0114591	0.0152807	0.00225226	0.00254837	0.00150099	0.00309295	0.00488397
i90.4.a i90.4.b	0.00494209	0.00397664	0.00407992	0.00411757	0.00851464	0.00202557	0.00570418	0.00200755	0.00210044	0.00667321	0.00727252	0.00700389	0.0115901	0.00859075	0.01755	0.00504302	0.00504506	0.00590489	0.00894498	0.0128188	0.00187767	0.00288324	0.0021691	0.00231013	0.00472193
i90.5.a i90.5.b	0.00442459	0.00309008	0.0034551	0.0044072	0.00767144	0.00176511	0.00293824	0.00182452	0.00263847	0.00461508	0.00843839	0.00776805	0.013355	0.0108185	0.0206451	0.0054003	0.0056421	0.00542854	0.0111776	0.0146247	0.00195403	0.00204666	0.00215447	0.00304418	0.00473335
i90.6.a i90.6.b i90.6.c i90.6.d i90.6.e i90.6.f	0.00431463	0.00288101	0.00242101	0.00459942	0.00726053	0.00163664	0.00266916	0.00120323	0.00252415	0.00411333	0.0134597	0.011738	0.0188947	0.0178379	0.0315276	0.00561121	0.00540762	0.00391377	0.0117351	0.0145698	0.00171872	0.00170294	0.00134674	0.00283489	0.00401405
i91 i92 i93 i95	0.00202116	0.00173997	0.00122278	0.00274778	0.00392085	0.000381618	0.00112338	0.00031715	0.000834579	0.00138174	0.00326521	0.00387772	0.00595433	0.00742661	0.0105803	0.00204236	0.00282859	0.00207176	0.00624861	0.00737217	0.000662206	0.00104885	0.00067457	0.00168266	0.00223267

[truncated: 3 more sheets: dElast_3D, dElast_4D, dElast_Opt]
